# Supplementary material for: Exploring the Archaeome: Detection of Archaeal Signatures in the Human Body
Source: Front Microbiol. 2019 Dec 5;10:2796. doi: 10.3389/fmicb.2019.02796 (PMC6906140; doi:10.3389/fmicb.2019.02796)
Supplement: Supplementary file 2 [file Table_1.xlsx]

## Sheet: biom_2nd_PCR349F-519R
Supplementary table 1a - biom table obtained after DADA2 analysis from the primer pair combinations with the second primer pair based on 349F-519R
#OTU ID	oral-21	oral-31	oral-91	oral-A1	oral-M1	oral-M5	oral-Q1	appendix-21	appendix-31	appendix-41	appendix-61	appendix-91	appendix-A1	appendix-M1	appendix-M5	appendix-Q1	appendix-Q5	nose-21	nose-31	nose-91	nose-A1	nose-M1	nose-M5	nose-Q1	nose-Q5	stool-21	stool-31	stool-41	stool-61	stool-91	stool-A1	stool-M1	stool-M5	stool-Q1	stool-Q5	skin-21	skin-31	skin-91	skin-M1	skin-M5	skin-Q5	taxonomy
OTU001	12	0	0	0	0	81	30	9	0	6	96	0	0	0	81	0	93	325	0	0	30	37	0	34	79	12	60162	26283	18	33782	32511	30745	35295	32341	48240	0	230	0	0	147	0	Archaea;Euryarchaeota;Methanobacteria;Methanobacteriales;Methanobacteriaceae;Methanobrevibacter
OTU002	0	0	0	0	0	34	0	0	0	0	31	0	7	0	0	0	0	165	0	0	0	0	0	0	0	0	14376	4803	0	14519	9871	5015	17486	4721	22773	0	78	0	0	39	0	Archaea;Euryarchaeota;Methanobacteria;Methanobacteriales;Methanobacteriaceae;Methanobrevibacter
OTU003	0	0	0	0	0	26	0	0	0	0	35	0	0	0	0	0	0	137	0	0	0	0	0	0	0	0	11095	12186	0	12681	12285	5603	12004	4726	14819	0	48	0	0	54	0	Archaea;Euryarchaeota;Methanobacteria;Methanobacteriales;Methanobacteriaceae;Methanobrevibacter
OTU004	0	0	0	10	24	6	17	15	0	0	98	0	0	0	0	0	19	360	0	0	0	0	55	34	0	19	69595	24308	19	32005	50215	42586	26147	43683	26090	11	113	0	0	0	11	Archaea;Euryarchaeota;Methanobacteria;Methanobacteriales;Methanobacteriaceae;Methanosphaera
OTU005	0	0	0	0	0	0	0	0	0	0	0	0	0	0	0	0	0	0	0	0	0	352	0	0	0	0	0	0	0	0	0	0	0	0	0	0	0	0	0	0	0	Archaea;NA;NA;NA;NA;NA
OTU006	0	0	0	0	0	0	0	0	0	0	0	0	0	0	0	0	0	0	0	0	0	363	0	0	0	0	0	0	0	0	0	0	0	0	0	0	0	0	0	0	0	Archaea;Thaumarchaeota;Soil_Crenarchaeotic_Group(SCG);NA;NA;NA
OTU007	0	0	0	0	0	0	0	0	0	0	0	0	0	0	0	0	0	0	167	0	0	0	0	0	0	0	0	0	0	0	0	0	0	0	0	0	0	0	0	0	0	Archaea;Thaumarchaeota;Soil_Crenarchaeotic_Group(SCG);NA;NA;NA
OTU008	0	177	0	0	0	0	0	0	0	0	0	0	0	0	0	0	0	0	0	0	0	0	0	0	0	0	0	0	0	0	0	0	0	0	0	0	0	0	0	0	0	Archaea;Woesearchaeota_(DHVEG-6);NA;NA;NA;NA
OTU009	0	0	0	0	0	0	0	0	0	0	0	0	0	0	0	129	0	0	0	0	0	0	0	0	0	0	0	0	0	0	0	0	0	0	0	0	0	0	0	0	0	Archaea;Woesearchaeota_(DHVEG-6);NA;NA;NA;NA
OTU010	0	0	0	0	0	0	0	0	0	0	0	128	0	0	0	0	0	0	0	0	0	0	0	0	0	0	0	0	0	0	0	0	0	0	0	0	0	0	0	0	0	Archaea;Woesearchaeota_(DHVEG-6);NA;NA;NA;NA
OTU011	0	0	121	0	0	0	0	0	0	0	0	0	0	0	0	0	0	0	0	0	0	0	0	0	0	0	0	0	0	0	0	0	0	0	0	0	0	0	0	0	0	Archaea;Woesearchaeota_(DHVEG-6);NA;NA;NA;NA
OTU012	0	0	0	0	0	0	0	0	0	0	0	0	0	0	0	0	0	0	0	0	0	0	0	0	0	0	0	0	0	0	0	0	0	0	0	0	103	0	0	0	0	Archaea;Woesearchaeota_(DHVEG-6);NA;NA;NA;NA
OTU013	0	0	0	0	0	0	0	0	0	0	0	0	0	0	0	0	0	0	0	68	0	0	0	0	0	0	0	0	0	0	0	0	0	0	0	0	0	0	0	0	0	Archaea;Woesearchaeota_(DHVEG-6);NA;NA;NA;NA
OTU014	0	0	0	0	0	0	0	0	0	0	0	0	0	0	0	0	0	0	0	0	0	0	0	0	0	0	0	0	0	0	0	0	0	61	0	0	0	0	0	0	0	Archaea;Woesearchaeota_(DHVEG-6);NA;NA;NA;NA
OTU015	0	0	0	0	0	0	0	0	0	0	0	0	0	0	0	0	0	0	0	0	0	0	0	0	0	0	0	0	0	0	0	0	0	24	0	0	0	0	0	0	0	Archaea;Woesearchaeota_(DHVEG-6);NA;NA;NA;NA
OTU016	0	0	0	0	0	0	0	0	0	0	0	0	0	0	0	0	0	0	0	0	0	0	0	0	0	0	0	0	0	0	0	0	0	0	4	0	0	0	0	0	0	Bacteria;Verrucomicrobia;Opitutae;NA;NA;NA
OTU017	0	0	0	0	0	0	0	0	0	0	0	0	0	0	0	0	0	0	0	0	0	0	0	0	0	0	0	0	0	42	0	0	58	0	50	0	0	0	0	0	0	Bacteria;Verrucomicrobia;Verrucomicrobiae;Verrucomicrobiales;Verrucomicrobiaceae;Akkermansia
OTU018	0	0	0	0	0	0	0	0	0	0	0	0	0	0	0	0	0	0	0	4	0	0	0	0	0	0	0	0	0	0	0	0	0	0	0	0	0	0	0	0	0	Eukaryota;Ascomycota;Eurotiomycetes;Eurotiales;Trichocomaceae;Penicillium
OTU019	0	0	0	0	0	0	0	0	0	0	0	0	0	0	0	0	0	0	0	0	0	0	0	0	0	0	0	0	0	59	0	0	0	0	0	0	0	0	0	0	0	Eukaryota;NA;NA;NA;NA;NA
OTU020	0	0	0	0	0	0	0	0	0	0	0	0	0	0	0	0	0	0	0	0	0	0	0	0	0	0	0	0	0	46	0	0	0	0	0	0	0	0	0	0	0	Eukaryota;NA;NA;NA;NA;NA
OTU021	0	0	0	0	0	0	0	0	0	0	18	0	0	0	0	0	0	0	0	0	0	2	0	0	0	0	16	0	0	0	0	0	0	0	0	0	0	0	0	9	0	Eukaryota;NA;NA;NA;NA;NA
OTU022	0	0	0	20	0	0	0	0	0	0	0	0	0	0	0	0	0	0	0	0	0	0	0	0	0	0	0	0	0	0	0	0	0	0	0	0	0	0	7	0	0	Eukaryota;NA;NA;NA;NA;NA
OTU023	0	0	0	0	0	0	0	0	0	0	0	0	0	12	0	0	0	0	0	0	0	0	0	0	0	0	0	0	0	0	0	0	0	0	0	0	0	0	0	0	0	Eukaryota;NA;NA;NA;NA;NA
OTU024	0	0	0	0	0	0	0	0	0	0	0	0	0	0	0	0	0	0	0	0	0	0	0	0	0	0	0	0	0	9	0	0	0	0	0	0	0	0	0	0	0	Eukaryota;NA;NA;NA;NA;NA
OTU025	0	0	0	0	0	0	0	0	0	0	0	0	0	0	0	0	0	0	0	0	0	0	0	0	0	0	0	0	0	0	0	0	0	0	9	0	0	0	0	0	0	Eukaryota;NA;NA;NA;NA;NA
OTU026	0	0	0	0	0	0	0	0	0	0	0	0	0	0	0	0	0	0	0	0	0	0	0	0	0	0	0	0	0	4	0	0	0	0	0	0	0	0	0	0	0	Eukaryota;NA;NA;NA;NA;NA
OTU027	0	0	0	0	0	0	0	0	0	0	0	0	0	0	0	0	0	3	0	0	0	0	0	0	0	0	0	0	0	0	0	0	0	0	0	0	0	0	0	0	0	Eukaryota;NA;NA;NA;NA;NA
OTU028	0	0	0	0	0	0	0	0	0	0	0	2	0	0	0	0	0	0	0	0	0	0	0	0	0	0	0	0	0	0	0	0	0	0	0	0	0	0	0	0	0	Eukaryota;NA;NA;NA;NA;NA
OTU029	0	0	0	0	0	0	0	0	0	0	0	0	0	0	0	0	0	0	0	0	0	0	0	0	0	0	0	0	0	2	0	0	0	0	0	0	0	0	0	0	0	Eukaryota;NA;NA;NA;NA;NA
OTU030	0	0	0	0	0	0	0	0	0	0	0	0	0	0	0	0	0	0	0	0	0	0	0	0	0	0	0	0	0	0	0	0	0	0	0	0	0	40	0	0	0	Eukaryota;Phragmoplastophyta;Embryophyta;NA;NA;NA
OTU031	0	0	0	0	0	0	0	0	0	0	0	0	0	0	0	0	0	0	0	0	0	0	0	0	0	0	0	0	0	8	0	0	0	0	0	0	0	0	0	0	0	Eukaryota;Phragmoplastophyta;Embryophyta;Rosales;Rosales_fa;Pyrus
OTU032	0	0	6	0	0	0	0	0	66	0	0	3072	0	12	0	0	0	0	22	1962	0	13	0	2	0	0	0	0	0	0	0	0	0	0	0	0	0	0	0	0	0	Eukaryota;Vertebrata;NA;NA;NA;NA
OTU033	0	0	0	0	0	0	0	0	0	0	0	2740	0	0	0	0	0	0	0	1784	0	0	0	0	0	0	0	0	0	0	0	0	0	0	0	0	0	0	0	0	0	Eukaryota;Vertebrata;NA;NA;NA;NA
OTU034	0	0	0	0	0	0	0	0	0	0	0	7	0	0	0	0	0	0	0	0	0	0	0	0	0	0	0	0	0	0	0	0	0	0	0	0	0	0	0	0	0	Eukaryota;Vertebrata;NA;NA;NA;NA
OTU035	0	0	0	0	0	0	0	0	0	0	0	2	0	0	0	0	0	0	0	0	0	0	0	0	0	0	0	0	0	0	0	0	0	0	0	0	0	0	0	0	0	Eukaryota;Vertebrata;NA;NA;NA;NA

## Sheet: biom_2nd_PCR519F-785R
Supplementary table 1b - biom table obtained after DADA2 analysis from the primer pair combinations with the second primer pair based on 519F-785R
#OTU ID	oral-33	oral-M6	appendix-22	appendix-33	appendix-62	appendix-M6	appendix-Q3	nose-22	nose-33	nose-62	nose-A3	nose-M3	nose-Q3	stool-22	stool-33	stool-42	stool-62	stool-71	stool-A3	stool-M3	stool-M6	stool-Q3	skin-22	skin-33	skin-62	skin-M3	skin-M6	taxonomy
OTU0001	0	12764	81	0	157	119517	11	131	0	0	18	24	326	35046	47473	39543	645	22859	33702	36179	33638	34413	0	0	631	261	130327	Archaea;Euryarchaeota;Methanobacteria;Methanobacteriales;Methanobacteriaceae;Methanobrevibacter
OTU0004	0	96315	0	0	0	0	0	0	0	0	0	0	0	0	0	0	0	0	0	0	0	0	0	0	0	0	0	Archaea;Euryarchaeota;Methanobacteria;Methanobacteriales;Methanobacteriaceae;Methanobrevibacter
OTU0010	0	0	0	0	0	0	0	0	0	0	0	0	0	0	0	0	0	0	0	0	0	0	44886	0	0	0	0	Archaea;Euryarchaeota;Methanobacteria;Methanobacteriales;Methanobacteriaceae;Methanobrevibacter
OTU0082	0	1981	0	0	0	0	0	0	0	0	0	0	0	0	0	0	0	0	0	0	0	0	0	0	0	0	0	Archaea;Euryarchaeota;Methanobacteria;Methanobacteriales;Methanobacteriaceae;Methanobrevibacter
OTU0085	0	1692	0	0	0	0	0	0	0	0	0	0	0	0	0	0	0	0	0	0	0	0	0	0	0	0	0	Archaea;Euryarchaeota;Methanobacteria;Methanobacteriales;Methanobacteriaceae;Methanobrevibacter
OTU0130	0	0	0	0	0	0	0	0	0	0	0	0	0	0	0	0	0	0	0	0	0	0	942	0	0	0	0	Archaea;Euryarchaeota;Methanobacteria;Methanobacteriales;Methanobacteriaceae;Methanobrevibacter
OTU0143	0	0	0	0	0	848	0	0	0	0	0	0	0	0	0	0	0	0	0	0	0	0	0	0	0	0	0	Archaea;Euryarchaeota;Methanobacteria;Methanobacteriales;Methanobacteriaceae;Methanobrevibacter
OTU0230	0	396	0	0	0	0	0	0	0	0	0	0	0	0	0	0	0	0	0	0	0	0	0	0	0	0	0	Archaea;Euryarchaeota;Methanobacteria;Methanobacteriales;Methanobacteriaceae;Methanobrevibacter
OTU0236	0	382	0	0	0	0	0	0	0	0	0	0	0	0	0	0	0	0	0	0	0	0	0	0	0	0	0	Archaea;Euryarchaeota;Methanobacteria;Methanobacteriales;Methanobacteriaceae;Methanobrevibacter
OTU0237	0	379	0	0	0	0	0	0	0	0	0	0	0	0	0	0	0	0	0	0	0	0	0	0	0	0	0	Archaea;Euryarchaeota;Methanobacteria;Methanobacteriales;Methanobacteriaceae;Methanobrevibacter
OTU0243	0	363	0	0	0	0	0	0	0	0	0	0	0	0	0	0	0	0	0	0	0	0	0	0	0	0	0	Archaea;Euryarchaeota;Methanobacteria;Methanobacteriales;Methanobacteriaceae;Methanobrevibacter
OTU0276	0	310	0	0	0	0	0	0	0	0	0	0	0	0	0	0	0	0	0	0	0	0	0	0	0	0	0	Archaea;Euryarchaeota;Methanobacteria;Methanobacteriales;Methanobacteriaceae;Methanobrevibacter
OTU0286	0	298	0	0	0	0	0	0	0	0	0	0	0	0	0	0	0	0	0	0	0	0	0	0	0	0	0	Archaea;Euryarchaeota;Methanobacteria;Methanobacteriales;Methanobacteriaceae;Methanobrevibacter
OTU0289	0	295	0	0	0	0	0	0	0	0	0	0	0	0	0	0	0	0	0	0	0	0	0	0	0	0	0	Archaea;Euryarchaeota;Methanobacteria;Methanobacteriales;Methanobacteriaceae;Methanobrevibacter
OTU0303	0	278	0	0	0	0	0	0	0	0	0	0	0	0	0	0	0	0	0	0	0	0	0	0	0	0	0	Archaea;Euryarchaeota;Methanobacteria;Methanobacteriales;Methanobacteriaceae;Methanobrevibacter
OTU0313	0	265	0	0	0	0	0	0	0	0	0	0	0	0	0	0	0	0	0	0	0	0	0	0	0	0	0	Archaea;Euryarchaeota;Methanobacteria;Methanobacteriales;Methanobacteriaceae;Methanobrevibacter
OTU0320	0	258	0	0	0	0	0	0	0	0	0	0	0	0	0	0	0	0	0	0	0	0	0	0	0	0	0	Archaea;Euryarchaeota;Methanobacteria;Methanobacteriales;Methanobacteriaceae;Methanobrevibacter
OTU0324	0	253	0	0	0	0	0	0	0	0	0	0	0	0	0	0	0	0	0	0	0	0	0	0	0	0	0	Archaea;Euryarchaeota;Methanobacteria;Methanobacteriales;Methanobacteriaceae;Methanobrevibacter
OTU0328	0	243	0	0	0	0	0	0	0	0	0	0	0	0	0	0	0	0	0	0	0	0	0	0	0	0	0	Archaea;Euryarchaeota;Methanobacteria;Methanobacteriales;Methanobacteriaceae;Methanobrevibacter
OTU0338	0	0	0	0	0	0	0	0	0	0	0	0	0	0	0	0	0	0	0	0	0	0	233	0	0	0	0	Archaea;Euryarchaeota;Methanobacteria;Methanobacteriales;Methanobacteriaceae;Methanobrevibacter
OTU0467	0	0	0	0	0	0	0	0	104	0	0	0	0	0	0	0	0	0	0	0	0	0	0	0	0	0	0	Archaea;Euryarchaeota;Methanobacteria;Methanobacteriales;Methanobacteriaceae;Methanobrevibacter
OTU0566	0	0	0	0	0	0	0	0	0	0	0	0	0	0	0	0	0	0	0	0	0	0	54	0	0	0	0	Archaea;Euryarchaeota;Methanobacteria;Methanobacteriales;Methanobacteriaceae;Methanobrevibacter
OTU0697	0	1	0	0	0	12	0	0	0	0	0	0	0	0	5	0	0	0	0	0	0	0	0	0	0	0	6	Archaea;Euryarchaeota;Methanobacteria;Methanobacteriales;Methanobacteriaceae;Methanobrevibacter
OTU0786	0	0	0	0	0	0	0	0	0	0	0	0	0	0	0	0	0	0	0	0	14	0	0	0	0	0	0	Archaea;Euryarchaeota;Methanobacteria;Methanobacteriales;Methanobacteriaceae;Methanobrevibacter
OTU0977	0	0	0	0	0	0	0	0	0	0	0	0	0	0	0	3	0	0	0	0	0	0	0	0	0	0	0	Archaea;Euryarchaeota;Methanobacteria;Methanobacteriales;Methanobacteriaceae;Methanobrevibacter
OTU1035	0	2	0	0	0	0	0	0	0	0	0	0	0	0	0	0	0	0	0	0	0	0	0	0	0	0	0	Archaea;Euryarchaeota;Methanobacteria;Methanobacteriales;Methanobacteriaceae;Methanobrevibacter
OTU1175	0	1	0	0	0	0	0	0	0	0	0	0	0	0	0	0	0	0	0	0	0	0	0	0	0	0	0	Archaea;Euryarchaeota;Methanobacteria;Methanobacteriales;Methanobacteriaceae;Methanobrevibacter
OTU1176	0	1	0	0	0	0	0	0	0	0	0	0	0	0	0	0	0	0	0	0	0	0	0	0	0	0	0	Archaea;Euryarchaeota;Methanobacteria;Methanobacteriales;Methanobacteriaceae;Methanobrevibacter
OTU1214	0	0	0	0	0	0	0	0	0	0	0	0	0	0	0	1	0	0	0	0	0	0	0	0	0	0	0	Archaea;Euryarchaeota;Methanobacteria;Methanobacteriales;Methanobacteriaceae;Methanobrevibacter
OTU1215	0	0	0	0	0	0	0	0	0	0	0	0	0	0	0	1	0	0	0	0	0	0	0	0	0	0	0	Archaea;Euryarchaeota;Methanobacteria;Methanobacteriales;Methanobacteriaceae;Methanobrevibacter
OTU1216	0	0	0	0	0	0	0	0	0	0	0	0	0	0	0	1	0	0	0	0	0	0	0	0	0	0	0	Archaea;Euryarchaeota;Methanobacteria;Methanobacteriales;Methanobacteriaceae;Methanobrevibacter
OTU1580	0	0	0	0	0	0	0	0	0	0	0	0	0	0	0	0	0	0	0	0	1	0	0	0	0	0	0	Archaea;Euryarchaeota;Methanobacteria;Methanobacteriales;Methanobacteriaceae;Methanobrevibacter
OTU1584	0	0	0	0	0	0	0	0	0	0	0	0	0	0	0	0	0	0	0	0	1	0	0	0	0	0	0	Archaea;Euryarchaeota;Methanobacteria;Methanobacteriales;Methanobacteriaceae;Methanobrevibacter
OTU0002	0	0	92776	32	0	0	10	128	0	0	98	24	344	47176	59885	77612	851	33223	53194	47008	41158	42503	41103	310	0	389	241	Archaea;Euryarchaeota;Methanobacteria;Methanobacteriales;Methanobacteriaceae;Methanosphaera
OTU0019	0	0	0	0	0	0	0	0	0	0	0	0	0	0	0	0	0	0	0	0	0	0	18801	0	0	0	0	Archaea;Euryarchaeota;Methanobacteria;Methanobacteriales;Methanobacteriaceae;Methanosphaera
OTU0342	0	0	0	0	0	0	0	0	0	0	0	0	0	0	0	0	0	0	0	0	0	0	228	0	0	0	0	Archaea;Euryarchaeota;Methanobacteria;Methanobacteriales;Methanobacteriaceae;Methanosphaera
OTU0543	0	0	39	0	0	0	0	0	0	0	0	0	0	0	0	0	0	0	0	0	0	0	27	0	0	0	0	Archaea;Euryarchaeota;Methanobacteria;Methanobacteriales;Methanobacteriaceae;Methanosphaera
OTU0684	0	0	7	0	0	0	0	0	0	0	0	0	0	9	0	10	0	0	0	0	0	0	0	0	0	0	0	Archaea;Euryarchaeota;Methanobacteria;Methanobacteriales;Methanobacteriaceae;Methanosphaera
OTU0698	0	0	11	0	0	0	0	0	0	0	0	0	0	0	13	0	0	0	0	0	0	0	0	0	0	0	0	Archaea;Euryarchaeota;Methanobacteria;Methanobacteriales;Methanobacteriaceae;Methanosphaera
OTU0915	0	0	0	0	0	0	0	0	0	0	0	0	0	0	0	0	0	0	0	0	0	5	0	0	0	0	0	Archaea;Euryarchaeota;Methanobacteria;Methanobacteriales;Methanobacteriaceae;Methanosphaera
OTU0961	0	0	0	0	0	0	0	0	0	0	0	0	0	0	0	0	0	0	0	0	0	0	0	0	0	0	0	Archaea;Euryarchaeota;Methanobacteria;Methanobacteriales;Methanobacteriaceae;Methanosphaera
OTU1585	0	0	0	0	0	0	0	0	0	0	0	0	0	0	0	0	0	0	0	0	0	1	0	0	0	0	0	Archaea;Euryarchaeota;Methanobacteria;Methanobacteriales;Methanobacteriaceae;Methanosphaera
OTU0371	0	0	0	0	0	0	0	0	0	0	0	0	0	0	0	0	0	0	0	0	0	0	0	190	0	0	0	Archaea;Euryarchaeota;NA;NA;NA;NA
OTU0425	0	0	0	0	0	0	0	0	0	0	0	0	0	0	0	0	0	0	0	0	0	0	0	134	0	0	0	Archaea;Euryarchaeota;NA;NA;NA;NA
OTU0443	0	0	0	0	0	0	0	0	0	0	0	0	0	0	0	0	0	0	0	0	0	0	0	119	0	0	0	Archaea;Euryarchaeota;NA;NA;NA;NA
OTU0013	0	0	0	0	0	0	0	0	0	0	0	0	0	0	7	0	0	0	0	0	0	0	0	27022	0	0	0	Archaea;NA;NA;NA;NA;NA
OTU0161	0	0	0	0	0	0	0	0	0	0	0	0	0	0	0	0	0	0	0	0	0	0	0	709	0	0	0	Archaea;NA;NA;NA;NA;NA
OTU0184	0	0	0	550	0	0	0	0	0	0	0	0	0	0	0	0	0	0	0	0	0	0	11	0	0	0	0	Archaea;NA;NA;NA;NA;NA
OTU0249	0	0	0	0	0	0	0	0	0	0	0	0	0	0	0	0	0	0	0	0	0	0	0	355	0	0	0	Archaea;NA;NA;NA;NA;NA
OTU0339	0	0	0	0	0	0	0	0	0	0	0	0	0	0	0	0	0	0	0	0	0	0	0	233	0	0	0	Archaea;NA;NA;NA;NA;NA
OTU0346	0	0	0	0	0	0	0	0	0	0	0	0	0	0	0	0	0	0	0	0	0	0	0	223	0	0	0	Archaea;NA;NA;NA;NA;NA
OTU0363	0	0	0	0	0	0	0	0	0	0	0	0	0	0	0	0	0	0	0	0	0	0	0	195	0	0	0	Archaea;NA;NA;NA;NA;NA
OTU0405	0	0	0	0	0	0	0	0	0	0	0	0	0	0	0	0	0	0	0	0	0	0	0	155	0	0	0	Archaea;NA;NA;NA;NA;NA
OTU0429	0	0	0	0	0	0	0	0	0	0	0	0	0	0	0	0	0	0	0	0	0	0	0	132	0	0	0	Archaea;NA;NA;NA;NA;NA
OTU0451	0	0	0	0	0	0	0	0	0	0	0	0	0	0	0	0	0	0	0	0	0	0	0	112	0	0	0	Archaea;NA;NA;NA;NA;NA
OTU0581	0	0	0	0	0	0	0	0	0	0	0	0	0	0	0	0	0	0	0	0	0	0	0	49	0	0	0	Archaea;NA;NA;NA;NA;NA
OTU0869	0	0	0	0	0	0	0	0	0	0	0	0	0	0	0	0	0	0	0	0	7	0	0	0	0	0	0	Archaea;Thaumarchaeota;Marine_Group_I;NA;NA;NA
OTU0003	0	0	0	0	0	0	33	0	0	34063	0	110762	0	0	0	0	0	0	0	0	0	0	0	0	0	0	0	Archaea;Thaumarchaeota;Soil_Crenarchaeotic_Group(SCG);NA;NA;NA
OTU0006	0	2	0	0	0	0	0	0	71078	0	0	0	0	0	0	0	0	0	0	0	0	0	0	0	0	0	0	Archaea;Thaumarchaeota;Soil_Crenarchaeotic_Group(SCG);NA;NA;NA
OTU0058	0	0	0	0	0	0	0	0	3309	0	0	0	0	0	0	0	0	0	0	0	0	0	0	0	0	0	0	Archaea;Thaumarchaeota;Soil_Crenarchaeotic_Group(SCG);NA;NA;NA
OTU0078	0	0	0	0	0	0	0	0	0	0	0	2171	0	0	0	0	0	0	0	0	0	0	0	0	0	0	0	Archaea;Thaumarchaeota;Soil_Crenarchaeotic_Group(SCG);NA;NA;NA
OTU0133	0	0	0	0	0	0	0	0	906	0	0	0	0	0	0	0	0	0	0	0	0	0	0	0	0	0	0	Archaea;Thaumarchaeota;Soil_Crenarchaeotic_Group(SCG);NA;NA;NA
OTU0172	0	0	0	0	0	0	0	0	0	0	0	615	0	0	0	0	0	0	0	0	0	0	0	0	0	0	0	Archaea;Thaumarchaeota;Soil_Crenarchaeotic_Group(SCG);NA;NA;NA
OTU0185	0	0	0	0	0	0	0	0	556	0	0	0	0	0	0	0	0	0	0	0	0	0	0	0	0	0	0	Archaea;Thaumarchaeota;Soil_Crenarchaeotic_Group(SCG);NA;NA;NA
OTU0188	0	0	0	0	0	0	0	0	0	0	0	548	0	0	0	0	0	0	0	0	0	0	0	0	0	0	0	Archaea;Thaumarchaeota;Soil_Crenarchaeotic_Group(SCG);NA;NA;NA
OTU0189	0	0	0	0	0	0	0	0	0	542	0	0	0	0	0	0	0	0	0	0	0	0	0	0	0	0	0	Archaea;Thaumarchaeota;Soil_Crenarchaeotic_Group(SCG);NA;NA;NA
OTU0196	0	0	0	0	0	0	0	0	0	0	0	526	0	0	0	0	0	0	0	0	0	0	0	0	0	0	0	Archaea;Thaumarchaeota;Soil_Crenarchaeotic_Group(SCG);NA;NA;NA
OTU0212	0	0	0	0	0	0	0	0	0	192	0	281	0	0	0	0	0	0	0	0	0	0	0	0	0	0	0	Archaea;Thaumarchaeota;Soil_Crenarchaeotic_Group(SCG);NA;NA;NA
OTU0217	0	0	0	0	0	0	0	0	442	0	0	0	0	0	0	0	0	0	0	0	0	0	0	0	0	0	0	Archaea;Thaumarchaeota;Soil_Crenarchaeotic_Group(SCG);NA;NA;NA
OTU0226	0	0	0	0	0	0	0	0	0	0	0	405	0	0	0	0	0	0	0	0	0	0	0	0	0	0	0	Archaea;Thaumarchaeota;Soil_Crenarchaeotic_Group(SCG);NA;NA;NA
OTU0238	0	0	0	0	0	0	0	0	372	0	0	0	0	0	0	0	0	0	0	0	0	0	0	0	0	0	0	Archaea;Thaumarchaeota;Soil_Crenarchaeotic_Group(SCG);NA;NA;NA
OTU0255	0	0	0	0	0	0	0	0	0	0	0	331	0	0	0	0	0	0	0	0	0	0	0	0	0	0	0	Archaea;Thaumarchaeota;Soil_Crenarchaeotic_Group(SCG);NA;NA;NA
OTU0260	0	0	0	0	0	0	0	0	0	0	0	327	0	0	0	0	0	0	0	0	0	0	0	0	0	0	0	Archaea;Thaumarchaeota;Soil_Crenarchaeotic_Group(SCG);NA;NA;NA
OTU0261	0	0	0	0	0	0	0	0	0	0	0	326	0	0	0	0	0	0	0	0	0	0	0	0	0	0	0	Archaea;Thaumarchaeota;Soil_Crenarchaeotic_Group(SCG);NA;NA;NA
OTU0264	0	0	0	0	0	0	0	0	0	0	0	324	0	0	0	0	0	0	0	0	0	0	0	0	0	0	0	Archaea;Thaumarchaeota;Soil_Crenarchaeotic_Group(SCG);NA;NA;NA
OTU0274	0	0	0	0	0	0	0	0	0	0	0	313	0	0	0	0	0	0	0	0	0	0	0	0	0	0	0	Archaea;Thaumarchaeota;Soil_Crenarchaeotic_Group(SCG);NA;NA;NA
OTU0279	0	0	0	0	0	0	0	0	0	0	0	308	0	0	0	0	0	0	0	0	0	0	0	0	0	0	0	Archaea;Thaumarchaeota;Soil_Crenarchaeotic_Group(SCG);NA;NA;NA
OTU0282	0	0	0	0	0	0	0	0	0	0	0	304	0	0	0	0	0	0	0	0	0	0	0	0	0	0	0	Archaea;Thaumarchaeota;Soil_Crenarchaeotic_Group(SCG);NA;NA;NA
OTU0293	0	0	0	0	0	0	0	0	0	0	0	290	0	0	0	0	0	0	0	0	0	0	0	0	0	0	0	Archaea;Thaumarchaeota;Soil_Crenarchaeotic_Group(SCG);NA;NA;NA
OTU0296	0	0	0	0	0	0	0	0	0	0	0	286	0	0	0	0	0	0	0	0	0	0	0	0	0	0	0	Archaea;Thaumarchaeota;Soil_Crenarchaeotic_Group(SCG);NA;NA;NA
OTU0297	0	0	0	0	0	0	0	0	0	0	0	284	0	0	0	0	0	0	0	0	0	0	0	0	0	0	0	Archaea;Thaumarchaeota;Soil_Crenarchaeotic_Group(SCG);NA;NA;NA
OTU0298	0	0	0	0	0	0	0	0	0	0	0	283	0	0	0	0	0	0	0	0	0	0	0	0	0	0	0	Archaea;Thaumarchaeota;Soil_Crenarchaeotic_Group(SCG);NA;NA;NA
OTU0318	0	0	0	0	0	0	0	0	0	0	0	261	0	0	0	0	0	0	0	0	0	0	0	0	0	0	0	Archaea;Thaumarchaeota;Soil_Crenarchaeotic_Group(SCG);NA;NA;NA
OTU0329	0	0	0	0	0	0	0	0	243	0	0	0	0	0	0	0	0	0	0	0	0	0	0	0	0	0	0	Archaea;Thaumarchaeota;Soil_Crenarchaeotic_Group(SCG);NA;NA;NA
OTU0353	0	0	0	0	0	0	0	0	0	216	0	0	0	0	0	0	0	0	0	0	0	0	0	0	0	0	0	Archaea;Thaumarchaeota;Soil_Crenarchaeotic_Group(SCG);NA;NA;NA
OTU0370	0	0	0	0	0	0	0	0	190	0	0	0	0	0	0	0	0	0	0	0	0	0	0	0	0	0	0	Archaea;Thaumarchaeota;Soil_Crenarchaeotic_Group(SCG);NA;NA;NA
OTU0378	0	0	0	0	0	0	0	0	180	0	0	0	0	0	0	0	0	0	0	0	0	0	0	0	0	0	0	Archaea;Thaumarchaeota;Soil_Crenarchaeotic_Group(SCG);NA;NA;NA
OTU0391	0	0	0	0	0	0	0	0	0	167	0	0	0	0	0	0	0	0	0	0	0	0	0	0	0	0	0	Archaea;Thaumarchaeota;Soil_Crenarchaeotic_Group(SCG);NA;NA;NA
OTU0404	0	0	0	0	0	0	0	0	0	155	0	0	0	0	0	0	0	0	0	0	0	0	0	0	0	0	0	Archaea;Thaumarchaeota;Soil_Crenarchaeotic_Group(SCG);NA;NA;NA
OTU0545	0	0	0	0	0	0	0	0	65	0	0	0	0	0	0	0	0	0	0	0	0	0	0	0	0	0	0	Archaea;Thaumarchaeota;Soil_Crenarchaeotic_Group(SCG);NA;NA;NA
OTU0628	0	0	0	0	0	0	0	0	0	0	0	39	0	0	0	0	0	0	0	0	0	0	0	0	0	0	0	Archaea;Thaumarchaeota;Soil_Crenarchaeotic_Group(SCG);NA;NA;NA
OTU0699	0	0	0	0	0	0	0	0	24	0	0	0	0	0	0	0	0	0	0	0	0	0	0	0	0	0	0	Archaea;Thaumarchaeota;Soil_Crenarchaeotic_Group(SCG);NA;NA;NA
OTU0801	0	0	0	0	0	0	0	0	12	0	0	0	0	0	0	0	0	0	0	0	0	0	0	0	0	0	0	Archaea;Thaumarchaeota;Soil_Crenarchaeotic_Group(SCG);NA;NA;NA
OTU0005	0	0	0	0	0	0	96080	0	0	0	0	0	0	0	0	0	0	0	0	0	0	0	0	0	0	0	0	Archaea;Woesearchaeota_(DHVEG-6);NA;NA;NA;NA
OTU0008	51310	0	0	0	0	0	0	0	0	0	0	0	0	0	0	0	0	0	0	0	0	0	0	0	0	0	0	Archaea;Woesearchaeota_(DHVEG-6);NA;NA;NA;NA
OTU0029	0	0	0	0	0	0	8129	0	0	0	0	0	0	0	0	0	0	0	0	0	0	0	0	0	0	0	0	Archaea;Woesearchaeota_(DHVEG-6);NA;NA;NA;NA
OTU0077	0	0	0	0	0	0	2216	0	0	0	0	0	0	0	0	0	0	0	0	0	0	0	0	0	0	0	0	Archaea;Woesearchaeota_(DHVEG-6);NA;NA;NA;NA
OTU0106	0	0	0	0	0	0	1359	0	0	0	0	0	0	0	0	0	0	0	0	0	0	0	0	0	0	0	0	Archaea;Woesearchaeota_(DHVEG-6);NA;NA;NA;NA
OTU0124	1055	0	0	0	0	0	0	0	0	0	0	0	0	0	0	0	0	0	0	0	0	0	0	0	0	0	0	Archaea;Woesearchaeota_(DHVEG-6);NA;NA;NA;NA
OTU0146	0	0	0	0	0	0	831	0	0	0	0	0	0	0	0	0	0	0	0	0	0	0	0	0	0	0	0	Archaea;Woesearchaeota_(DHVEG-6);NA;NA;NA;NA
OTU0164	0	0	0	0	0	0	676	0	0	0	0	0	0	0	0	0	0	0	0	0	0	0	0	0	0	0	0	Archaea;Woesearchaeota_(DHVEG-6);NA;NA;NA;NA
OTU0170	656	0	0	0	0	0	0	0	0	0	0	0	0	0	0	0	0	0	0	0	0	0	0	0	0	0	0	Archaea;Woesearchaeota_(DHVEG-6);NA;NA;NA;NA
OTU0180	0	0	0	0	0	0	568	0	0	0	0	0	0	0	0	0	0	0	0	0	0	0	0	0	0	0	0	Archaea;Woesearchaeota_(DHVEG-6);NA;NA;NA;NA
OTU0199	0	0	0	0	0	0	509	0	0	0	0	0	0	0	0	0	0	0	0	0	0	0	0	0	0	0	0	Archaea;Woesearchaeota_(DHVEG-6);NA;NA;NA;NA
OTU0219	0	0	0	0	0	0	438	0	0	0	0	0	0	0	0	0	0	0	0	0	0	0	0	0	0	0	0	Archaea;Woesearchaeota_(DHVEG-6);NA;NA;NA;NA
OTU0231	0	0	0	0	0	0	394	0	0	0	0	0	0	0	0	0	0	0	0	0	0	0	0	0	0	0	0	Archaea;Woesearchaeota_(DHVEG-6);NA;NA;NA;NA
OTU0240	0	0	0	0	0	0	367	0	0	0	0	0	0	0	0	0	0	0	0	0	0	0	0	0	0	0	0	Archaea;Woesearchaeota_(DHVEG-6);NA;NA;NA;NA
OTU0246	0	0	0	0	0	0	359	0	0	0	0	0	0	0	0	0	0	0	0	0	0	0	0	0	0	0	0	Archaea;Woesearchaeota_(DHVEG-6);NA;NA;NA;NA
OTU0250	351	0	0	0	0	0	0	0	0	0	0	0	0	0	0	0	0	0	0	0	0	0	0	0	0	0	0	Archaea;Woesearchaeota_(DHVEG-6);NA;NA;NA;NA
OTU0251	0	0	0	0	0	0	350	0	0	0	0	0	0	0	0	0	0	0	0	0	0	0	0	0	0	0	0	Archaea;Woesearchaeota_(DHVEG-6);NA;NA;NA;NA
OTU0252	0	0	0	0	0	0	338	0	0	0	0	0	0	0	0	0	0	0	0	0	0	0	0	0	0	0	0	Archaea;Woesearchaeota_(DHVEG-6);NA;NA;NA;NA
OTU0263	0	0	0	0	0	0	325	0	0	0	0	0	0	0	0	0	0	0	0	0	0	0	0	0	0	0	0	Archaea;Woesearchaeota_(DHVEG-6);NA;NA;NA;NA
OTU0265	0	0	0	0	0	0	322	0	0	0	0	0	0	0	0	0	0	0	0	0	0	0	0	0	0	0	0	Archaea;Woesearchaeota_(DHVEG-6);NA;NA;NA;NA
OTU0267	0	0	0	0	0	0	320	0	0	0	0	0	0	0	0	0	0	0	0	0	0	0	0	0	0	0	0	Archaea;Woesearchaeota_(DHVEG-6);NA;NA;NA;NA
OTU0271	0	0	0	0	0	0	313	0	0	0	0	0	0	0	0	0	0	0	0	0	0	0	0	0	0	0	0	Archaea;Woesearchaeota_(DHVEG-6);NA;NA;NA;NA
OTU0272	0	0	0	0	0	0	313	0	0	0	0	0	0	0	0	0	0	0	0	0	0	0	0	0	0	0	0	Archaea;Woesearchaeota_(DHVEG-6);NA;NA;NA;NA
OTU0273	0	0	0	0	0	0	313	0	0	0	0	0	0	0	0	0	0	0	0	0	0	0	0	0	0	0	0	Archaea;Woesearchaeota_(DHVEG-6);NA;NA;NA;NA
OTU0281	0	0	0	0	0	0	307	0	0	0	0	0	0	0	0	0	0	0	0	0	0	0	0	0	0	0	0	Archaea;Woesearchaeota_(DHVEG-6);NA;NA;NA;NA
OTU0285	0	0	0	0	0	0	302	0	0	0	0	0	0	0	0	0	0	0	0	0	0	0	0	0	0	0	0	Archaea;Woesearchaeota_(DHVEG-6);NA;NA;NA;NA
OTU0287	0	0	0	0	0	0	298	0	0	0	0	0	0	0	0	0	0	0	0	0	0	0	0	0	0	0	0	Archaea;Woesearchaeota_(DHVEG-6);NA;NA;NA;NA
OTU0288	0	0	0	0	0	0	298	0	0	0	0	0	0	0	0	0	0	0	0	0	0	0	0	0	0	0	0	Archaea;Woesearchaeota_(DHVEG-6);NA;NA;NA;NA
OTU0295	0	0	0	0	0	0	288	0	0	0	0	0	0	0	0	0	0	0	0	0	0	0	0	0	0	0	0	Archaea;Woesearchaeota_(DHVEG-6);NA;NA;NA;NA
OTU0300	0	0	0	0	0	0	282	0	0	0	0	0	0	0	0	0	0	0	0	0	0	0	0	0	0	0	0	Archaea;Woesearchaeota_(DHVEG-6);NA;NA;NA;NA
OTU0302	0	0	0	0	0	0	280	0	0	0	0	0	0	0	0	0	0	0	0	0	0	0	0	0	0	0	0	Archaea;Woesearchaeota_(DHVEG-6);NA;NA;NA;NA
OTU0306	0	0	0	0	0	0	271	0	0	0	0	0	0	0	0	0	0	0	0	0	0	0	0	0	0	0	0	Archaea;Woesearchaeota_(DHVEG-6);NA;NA;NA;NA
OTU0311	0	0	0	0	0	0	267	0	0	0	0	0	0	0	0	0	0	0	0	0	0	0	0	0	0	0	0	Archaea;Woesearchaeota_(DHVEG-6);NA;NA;NA;NA
OTU0312	0	0	0	0	0	0	267	0	0	0	0	0	0	0	0	0	0	0	0	0	0	0	0	0	0	0	0	Archaea;Woesearchaeota_(DHVEG-6);NA;NA;NA;NA
OTU0315	0	0	0	0	0	0	263	0	0	0	0	0	0	0	0	0	0	0	0	0	0	0	0	0	0	0	0	Archaea;Woesearchaeota_(DHVEG-6);NA;NA;NA;NA
OTU0316	0	0	0	0	0	0	263	0	0	0	0	0	0	0	0	0	0	0	0	0	0	0	0	0	0	0	0	Archaea;Woesearchaeota_(DHVEG-6);NA;NA;NA;NA
OTU0317	0	0	0	0	0	0	262	0	0	0	0	0	0	0	0	0	0	0	0	0	0	0	0	0	0	0	0	Archaea;Woesearchaeota_(DHVEG-6);NA;NA;NA;NA
OTU0323	0	0	0	0	0	0	254	0	0	0	0	0	0	0	0	0	0	0	0	0	0	0	0	0	0	0	0	Archaea;Woesearchaeota_(DHVEG-6);NA;NA;NA;NA
OTU0325	0	0	0	0	0	0	252	0	0	0	0	0	0	0	0	0	0	0	0	0	0	0	0	0	0	0	0	Archaea;Woesearchaeota_(DHVEG-6);NA;NA;NA;NA
OTU0326	0	0	0	0	0	0	251	0	0	0	0	0	0	0	0	0	0	0	0	0	0	0	0	0	0	0	0	Archaea;Woesearchaeota_(DHVEG-6);NA;NA;NA;NA
OTU0331	241	0	0	0	0	0	0	0	0	0	0	0	0	0	0	0	0	0	0	0	0	0	0	0	0	0	0	Archaea;Woesearchaeota_(DHVEG-6);NA;NA;NA;NA
OTU0335	0	0	0	0	0	0	236	0	0	0	0	0	0	0	0	0	0	0	0	0	0	0	0	0	0	0	0	Archaea;Woesearchaeota_(DHVEG-6);NA;NA;NA;NA
OTU0359	206	0	0	0	0	0	0	0	0	0	0	0	0	0	0	0	0	0	0	0	0	0	0	0	0	0	0	Archaea;Woesearchaeota_(DHVEG-6);NA;NA;NA;NA
OTU0360	204	0	0	0	0	0	0	0	0	0	0	0	0	0	0	0	0	0	0	0	0	0	0	0	0	0	0	Archaea;Woesearchaeota_(DHVEG-6);NA;NA;NA;NA
OTU0365	193	0	0	0	0	0	0	0	0	0	0	0	0	0	0	0	0	0	0	0	0	0	0	0	0	0	0	Archaea;Woesearchaeota_(DHVEG-6);NA;NA;NA;NA
OTU0366	192	0	0	0	0	0	0	0	0	0	0	0	0	0	0	0	0	0	0	0	0	0	0	0	0	0	0	Archaea;Woesearchaeota_(DHVEG-6);NA;NA;NA;NA
OTU0372	189	0	0	0	0	0	0	0	0	0	0	0	0	0	0	0	0	0	0	0	0	0	0	0	0	0	0	Archaea;Woesearchaeota_(DHVEG-6);NA;NA;NA;NA
OTU0374	187	0	0	0	0	0	0	0	0	0	0	0	0	0	0	0	0	0	0	0	0	0	0	0	0	0	0	Archaea;Woesearchaeota_(DHVEG-6);NA;NA;NA;NA
OTU0377	0	0	0	0	0	0	185	0	0	0	0	0	0	0	0	0	0	0	0	0	0	0	0	0	0	0	0	Archaea;Woesearchaeota_(DHVEG-6);NA;NA;NA;NA
OTU0384	173	0	0	0	0	0	0	0	0	0	0	0	0	0	0	0	0	0	0	0	0	0	0	0	0	0	0	Archaea;Woesearchaeota_(DHVEG-6);NA;NA;NA;NA
OTU0386	171	0	0	0	0	0	0	0	0	0	0	0	0	0	0	0	0	0	0	0	0	0	0	0	0	0	0	Archaea;Woesearchaeota_(DHVEG-6);NA;NA;NA;NA
OTU0395	162	0	0	0	0	0	0	0	0	0	0	0	0	0	0	0	0	0	0	0	0	0	0	0	0	0	0	Archaea;Woesearchaeota_(DHVEG-6);NA;NA;NA;NA
OTU0403	155	0	0	0	0	0	0	0	0	0	0	0	0	0	0	0	0	0	0	0	0	0	0	0	0	0	0	Archaea;Woesearchaeota_(DHVEG-6);NA;NA;NA;NA
OTU0442	0	0	0	0	0	0	119	0	0	0	0	0	0	0	0	0	0	0	0	0	0	0	0	0	0	0	0	Archaea;Woesearchaeota_(DHVEG-6);NA;NA;NA;NA
OTU0449	114	0	0	0	0	0	0	0	0	0	0	0	0	0	0	0	0	0	0	0	0	0	0	0	0	0	0	Archaea;Woesearchaeota_(DHVEG-6);NA;NA;NA;NA
OTU0505	84	0	0	0	0	0	0	0	0	0	0	0	0	0	0	0	0	0	0	0	0	0	0	0	0	0	0	Archaea;Woesearchaeota_(DHVEG-6);NA;NA;NA;NA
OTU0529	0	0	0	0	0	0	69	0	0	0	0	0	0	0	0	0	0	0	0	0	0	0	0	0	0	0	0	Archaea;Woesearchaeota_(DHVEG-6);NA;NA;NA;NA
OTU0618	0	0	0	0	0	0	40	0	0	0	0	0	0	0	0	0	0	0	0	0	0	0	0	0	0	0	0	Archaea;Woesearchaeota_(DHVEG-6);NA;NA;NA;NA
OTU0640	36	0	0	0	0	0	0	0	0	0	0	0	0	0	0	0	0	0	0	0	0	0	0	0	0	0	0	Archaea;Woesearchaeota_(DHVEG-6);NA;NA;NA;NA
OTU0646	0	0	0	0	0	0	0	0	0	0	0	0	0	0	0	0	0	0	0	0	0	35	0	0	0	0	0	Archaea;Woesearchaeota_(DHVEG-6);NA;NA;NA;NA
OTU0717	0	0	0	0	0	0	21	0	0	0	0	0	0	0	0	0	0	0	0	0	0	0	0	0	0	0	0	Archaea;Woesearchaeota_(DHVEG-6);NA;NA;NA;NA
OTU0724	20	0	0	0	0	0	0	0	0	0	0	0	0	0	0	0	0	0	0	0	0	0	0	0	0	0	0	Archaea;Woesearchaeota_(DHVEG-6);NA;NA;NA;NA
OTU0787	0	0	0	0	0	0	0	0	0	0	0	0	0	0	0	0	0	0	0	0	0	0	0	0	0	0	14	Archaea;Woesearchaeota_(DHVEG-6);NA;NA;NA;NA
OTU0964	0	0	0	0	0	0	0	0	0	3	0	0	0	0	0	0	0	0	0	0	0	0	0	0	0	0	0	Archaea;Woesearchaeota_(DHVEG-6);NA;NA;NA;NA
	55699	116479	92914	582	157	120377	119649	259	77481	35338	116	119032	670	82231	107383	117171	1496	56082	86896	83187	74819	76957	106285	29938	631	650	130588

## Sheet: biom_2ndPCR_519F-806R
Supplementary table 1c - biom table obtained after DADA2 analysis from the primer pair combinations with the second primer pair based on 519F-806R
#OTU ID	oral-23	oral-34	oral-43	oral-72	oral-A4	oral-M7	oral-Q7	appendix-23	appendix-43	appendix-63	appendix-72	appendix-M7	appendix-Q4	appendix-Q7	nose-23	nose-34	nose-63	nose-72	nose-A4	nose-M4	nose-M7	nose-Q4	nose-Q7	stool-23	stool-34	stool-43	stool-63	stool-72	stool-A4	stool-M4	stool-M7	stool-Q4	stool-Q7	skin-23	skin-34	skin-43	skin-72	skin-A4	skin-M4	skin-M7	skin-Q4	skin-Q7	taxonomy
OTU1100	0	0	0	0	0	0	0	0	0	0	0	0	0	0	0	0	0	0	0	0	0	0	0	0	0	0	0	0	0	0	0	2	0	0	0	0	0	0	0	0	0	0	Archaea;Euryarchaeota;Methanobacteria;Methanobacteriales;Methanobacteriaceae;Methanobrevibacter
OTU0984	0	0	0	0	0	6	0	0	0	0	0	0	0	0	0	0	0	0	0	0	0	0	0	0	0	0	0	0	0	0	0	0	0	0	0	0	0	0	0	0	0	0	Archaea;Euryarchaeota;Methanobacteria;Methanobacteriales;Methanobacteriaceae;Methanobrevibacter
OTU0967	0	0	0	7	0	0	0	0	0	0	0	0	0	0	0	0	0	0	0	0	0	0	0	0	0	0	0	0	0	0	0	0	0	0	0	0	0	0	0	0	0	0	Archaea;Euryarchaeota;Methanobacteria;Methanobacteriales;Methanobacteriaceae;Methanobrevibacter
OTU0939	0	0	0	0	0	0	0	0	0	0	0	0	0	0	0	0	0	0	0	0	0	0	0	0	0	0	0	0	0	0	10	0	0	0	0	0	0	0	0	0	0	0	Archaea;Euryarchaeota;Methanobacteria;Methanobacteriales;Methanobacteriaceae;Methanobrevibacter
OTU0921	0	0	0	0	0	0	0	0	0	0	0	0	0	0	0	0	0	0	0	0	0	0	0	0	0	0	0	0	0	0	0	7	0	0	0	0	0	0	0	4	0	0	Archaea;Euryarchaeota;Methanobacteria;Methanobacteriales;Methanobacteriaceae;Methanobrevibacter
OTU0763	0	0	0	0	0	0	0	0	0	0	0	9	0	0	0	0	0	0	0	0	0	0	0	0	3	2	0	0	0	0	4	0	0	0	0	0	0	0	0	6	0	0	Archaea;Euryarchaeota;Methanobacteria;Methanobacteriales;Methanobacteriaceae;Methanobrevibacter
OTU0565	0	0	0	0	0	0	0	0	0	0	0	0	0	0	0	0	0	0	0	0	0	0	0	0	0	0	0	0	0	0	0	0	0	63	0	0	0	0	0	0	0	0	Archaea;Euryarchaeota;Methanobacteria;Methanobacteriales;Methanobacteriaceae;Methanobrevibacter
OTU0544	0	0	0	0	0	0	0	0	0	0	0	0	0	0	0	0	0	0	0	0	0	0	71	0	0	0	0	0	0	0	0	0	0	0	0	0	0	0	0	0	0	0	Archaea;Euryarchaeota;Methanobacteria;Methanobacteriales;Methanobacteriaceae;Methanobrevibacter
OTU0483	0	0	0	103	0	0	0	0	0	0	0	0	0	0	0	0	0	0	0	0	0	0	0	0	0	0	0	0	0	0	0	0	0	0	0	0	0	0	0	0	0	0	Archaea;Euryarchaeota;Methanobacteria;Methanobacteriales;Methanobacteriaceae;Methanobrevibacter
OTU0409	0	0	0	0	0	0	0	0	0	0	0	0	0	0	0	0	0	0	0	0	0	0	0	0	0	0	0	0	0	0	0	0	0	148	0	0	0	0	0	0	0	0	Archaea;Euryarchaeota;Methanobacteria;Methanobacteriales;Methanobacteriaceae;Methanobrevibacter
OTU0386	0	0	0	173	0	0	0	0	0	0	0	0	0	0	0	0	0	0	0	0	0	0	0	0	0	0	0	0	0	0	0	0	0	0	0	0	0	0	0	0	0	0	Archaea;Euryarchaeota;Methanobacteria;Methanobacteriales;Methanobacteriaceae;Methanobrevibacter
OTU0383	0	0	0	179	0	0	0	0	0	0	0	0	0	0	0	0	0	0	0	0	0	0	0	0	0	0	0	0	0	0	0	0	0	0	0	0	0	0	0	0	0	0	Archaea;Euryarchaeota;Methanobacteria;Methanobacteriales;Methanobacteriaceae;Methanobrevibacter
OTU0301	0	0	0	0	0	280	0	0	0	0	0	0	0	0	0	0	0	0	0	0	0	0	0	0	0	0	0	0	0	0	0	0	0	0	0	0	0	0	0	0	0	0	Archaea;Euryarchaeota;Methanobacteria;Methanobacteriales;Methanobacteriaceae;Methanobrevibacter
OTU0271	0	0	0	0	0	0	0	0	0	0	0	319	0	0	0	0	0	0	0	0	0	0	0	0	0	0	0	0	0	0	0	0	0	0	0	0	0	0	0	0	0	0	Archaea;Euryarchaeota;Methanobacteria;Methanobacteriales;Methanobacteriaceae;Methanobrevibacter
OTU0265	0	0	0	0	0	325	0	0	0	0	0	0	0	0	0	0	0	0	0	0	0	0	0	0	0	0	0	0	0	0	0	0	0	0	0	0	0	0	0	0	0	0	Archaea;Euryarchaeota;Methanobacteria;Methanobacteriales;Methanobacteriaceae;Methanobrevibacter
OTU0261	0	0	0	0	0	331	0	0	0	0	0	0	0	0	0	0	0	0	0	0	0	0	0	0	0	0	0	0	0	0	0	0	0	0	0	0	0	0	0	0	0	0	Archaea;Euryarchaeota;Methanobacteria;Methanobacteriales;Methanobacteriaceae;Methanobrevibacter
OTU0245	0	0	0	353	0	0	0	0	0	0	0	0	0	0	0	0	0	0	0	0	0	0	0	0	0	0	0	0	0	0	0	0	0	0	0	0	0	0	0	0	0	0	Archaea;Euryarchaeota;Methanobacteria;Methanobacteriales;Methanobacteriaceae;Methanobrevibacter
OTU0232	0	0	0	0	0	387	0	0	0	0	0	0	0	0	0	0	0	0	0	0	0	0	0	0	0	0	0	0	0	0	0	0	0	0	0	0	0	0	0	0	0	0	Archaea;Euryarchaeota;Methanobacteria;Methanobacteriales;Methanobacteriaceae;Methanobrevibacter
OTU0200	0	0	0	0	0	474	0	0	0	0	0	0	0	0	0	0	0	0	0	0	0	0	0	0	0	0	0	0	0	0	0	0	0	0	0	0	0	0	0	0	0	0	Archaea;Euryarchaeota;Methanobacteria;Methanobacteriales;Methanobacteriaceae;Methanobrevibacter
OTU0193	0	0	0	0	0	483	0	0	0	0	0	0	0	0	0	0	0	0	0	0	0	0	0	0	0	0	0	0	0	0	0	0	0	0	0	0	0	0	0	0	0	0	Archaea;Euryarchaeota;Methanobacteria;Methanobacteriales;Methanobacteriaceae;Methanobrevibacter
OTU0095	0	0	0	0	0	1370	0	0	0	0	0	0	0	0	0	0	0	0	0	0	0	0	0	0	0	0	0	0	0	0	0	0	0	0	0	0	0	0	0	0	0	0	Archaea;Euryarchaeota;Methanobacteria;Methanobacteriales;Methanobacteriaceae;Methanobrevibacter
OTU0068	0	0	0	0	0	2293	0	0	0	0	0	0	0	0	0	0	0	0	0	0	0	0	0	0	0	0	0	0	0	0	0	0	0	0	0	0	0	0	0	0	0	0	Archaea;Euryarchaeota;Methanobacteria;Methanobacteriales;Methanobacteriaceae;Methanobrevibacter
OTU0013	0	0	0	0	0	0	0	0	0	0	0	0	0	0	0	0	0	0	0	0	0	0	0	0	0	0	0	0	0	0	0	0	0	36602	0	0	0	0	0	0	0	0	Archaea;Euryarchaeota;Methanobacteria;Methanobacteriales;Methanobacteriaceae;Methanobrevibacter
OTU0005	0	0	0	0	0	115365	0	0	0	0	0	0	0	0	0	0	0	0	0	0	0	0	0	0	0	0	0	0	0	0	0	0	0	0	0	0	0	0	0	0	0	38	Archaea;Euryarchaeota;Methanobacteria;Methanobacteriales;Methanobacteriaceae;Methanobrevibacter
OTU0002	123	0	229	35002	69	8502	27	54	696	482	1302	51221	8	64671	2384	8	0	1864	2152	0	29	7563	92395	26404	32664	19165	1247	34692	26574	28497	41002	21126	40822	0	36	0	1030	184	0	112387	53	0	Archaea;Euryarchaeota;Methanobacteria;Methanobacteriales;Methanobacteriaceae;Methanobrevibacter
OTU0839	0	0	0	0	0	0	0	17	0	0	0	0	0	0	0	0	0	0	0	0	0	0	0	0	0	0	0	0	0	0	0	0	0	0	0	0	0	0	0	0	0	0	Archaea;Euryarchaeota;Methanobacteria;Methanobacteriales;Methanobacteriaceae;Methanosphaera
OTU0780	0	0	0	0	0	0	0	0	0	0	0	0	0	0	0	0	0	0	0	0	11	0	0	0	0	0	0	0	0	0	0	0	0	0	0	0	0	0	0	0	0	11	Archaea;Euryarchaeota;Methanobacteria;Methanobacteriales;Methanobacteriaceae;Methanosphaera
OTU0696	0	0	0	0	0	0	0	9	0	0	0	0	0	7	0	0	0	0	0	0	0	0	0	0	0	0	0	0	2	9	0	0	0	6	0	0	0	0	0	0	0	0	Archaea;Euryarchaeota;Methanobacteria;Methanobacteriales;Methanobacteriaceae;Methanosphaera
OTU0687	0	0	0	0	0	0	0	0	0	0	0	0	0	0	0	0	0	0	0	0	0	0	0	0	0	0	0	0	0	0	0	0	0	0	0	0	0	0	0	0	0	36	Archaea;Euryarchaeota;Methanobacteria;Methanobacteriales;Methanobacteriaceae;Methanosphaera
OTU0514	0	0	0	0	0	0	0	0	0	0	0	0	0	0	0	0	0	0	0	0	83	0	0	0	0	0	0	0	0	0	0	0	0	0	0	0	0	0	0	0	0	0	Archaea;Euryarchaeota;Methanobacteria;Methanobacteriales;Methanobacteriaceae;Methanosphaera
OTU0461	0	0	0	0	0	0	0	0	0	0	0	0	0	0	0	0	0	0	116	0	0	0	0	0	0	0	0	0	0	0	0	0	0	0	0	0	0	0	0	0	0	0	Archaea;Euryarchaeota;Methanobacteria;Methanobacteriales;Methanobacteriaceae;Methanosphaera
OTU0335	0	0	0	0	0	0	0	52	0	0	0	0	0	0	0	0	0	0	0	0	55	0	0	0	0	0	0	29	0	0	0	0	0	30	0	0	0	0	0	0	0	68	Archaea;Euryarchaeota;Methanobacteria;Methanobacteriales;Methanobacteriaceae;Methanosphaera
OTU0251	0	0	0	0	0	0	346	0	0	0	0	0	0	0	0	0	0	0	0	0	0	0	0	0	0	0	0	0	0	0	0	0	0	0	0	0	0	0	0	0	0	0	Archaea;Euryarchaeota;Methanobacteria;Methanobacteriales;Methanobacteriaceae;Methanosphaera
OTU0120	0	0	0	0	0	0	984	0	0	0	0	0	0	0	0	0	0	0	0	0	0	0	0	0	0	0	0	0	0	0	0	0	0	0	0	0	0	0	0	0	0	0	Archaea;Euryarchaeota;Methanobacteria;Methanobacteriales;Methanobacteriaceae;Methanosphaera
OTU0023	0	0	0	0	0	0	0	320	0	0	0	0	0	0	0	0	0	0	0	0	0	0	0	0	0	0	0	0	0	0	0	0	0	18266	0	0	0	0	0	0	0	0	Archaea;Euryarchaeota;Methanobacteria;Methanobacteriales;Methanobacteriaceae;Methanosphaera
OTU0006	0	0	0	0	0	0	110083	0	0	0	0	0	0	0	0	0	0	0	0	0	0	0	0	0	0	0	0	0	0	0	0	0	0	0	0	0	0	0	0	0	0	0	Archaea;Euryarchaeota;Methanobacteria;Methanobacteriales;Methanobacteriaceae;Methanosphaera
OTU0001	457	0	0	0	91	60	0	119412	6	0	0	0	0	34333	1723	0	7	146	2677	0	73701	7369	3116	48575	47929	31016	1169	51297	54207	46005	53727	34261	50065	38364	0	9	0	275	0	22	1028	127786	Archaea;Euryarchaeota;Methanobacteria;Methanobacteriales;Methanobacteriaceae;Methanosphaera
OTU0732	0	0	0	0	0	0	0	0	0	0	0	0	0	0	0	0	0	0	0	0	0	0	0	0	0	0	0	0	0	0	0	0	0	0	29	0	0	0	0	0	0	0	Archaea;Euryarchaeota;NA;NA;NA;NA
OTU0397	0	0	0	0	0	0	0	0	0	0	0	0	0	0	0	0	0	0	0	0	0	0	0	0	0	0	0	0	0	0	0	0	0	0	160	0	0	0	0	0	0	0	Archaea;Euryarchaeota;NA;NA;NA;NA
OTU0283	0	0	0	0	0	0	0	0	0	0	0	0	0	0	0	0	0	0	0	0	0	0	0	0	0	0	0	0	0	0	0	0	0	0	303	0	0	0	0	0	0	0	Archaea;Euryarchaeota;NA;NA;NA;NA
OTU0276	0	0	0	0	0	0	0	0	0	0	0	0	0	0	0	0	0	0	0	0	0	0	0	0	0	0	0	0	0	0	0	0	0	0	315	0	0	0	0	0	0	0	Archaea;Euryarchaeota;NA;NA;NA;NA
OTU0255	0	0	0	0	0	0	0	0	0	0	0	0	0	0	0	0	0	0	0	0	0	0	0	0	0	0	0	0	0	0	0	0	0	0	338	0	0	0	0	0	0	0	Archaea;Euryarchaeota;NA;NA;NA;NA
OTU0250	0	0	0	0	0	0	0	0	0	0	0	0	0	0	0	0	0	0	0	0	0	0	0	0	0	0	0	0	0	0	0	0	0	0	347	0	0	0	0	0	0	0	Archaea;Euryarchaeota;NA;NA;NA;NA
OTU0038	0	0	0	0	0	0	0	0	0	0	0	0	0	0	0	0	0	0	0	0	0	0	0	0	0	0	0	0	0	0	0	0	0	0	6121	0	0	0	0	0	0	0	Archaea;Euryarchaeota;NA;NA;NA;NA
OTU0886	0	0	0	0	0	0	0	0	0	0	0	0	0	0	0	0	0	0	0	0	0	0	0	0	0	0	0	0	0	0	0	0	0	0	13	0	0	0	0	0	0	0	Archaea;NA;NA;NA;NA;NA
OTU0563	0	0	0	0	0	0	0	0	0	0	0	0	0	0	0	0	0	0	0	0	0	0	0	0	0	0	0	0	0	0	0	0	0	0	64	0	0	0	0	0	0	0	Archaea;NA;NA;NA;NA;NA
OTU0478	0	0	0	0	0	0	0	0	0	0	0	0	0	0	0	0	0	0	0	0	0	0	0	0	0	0	0	0	0	0	0	0	0	0	108	0	0	0	0	0	0	0	Archaea;NA;NA;NA;NA;NA
OTU0350	0	0	0	0	0	0	0	0	0	0	0	0	0	0	0	0	0	0	0	0	0	0	0	0	0	0	0	0	0	0	0	0	0	0	212	0	0	0	0	0	0	0	Archaea;NA;NA;NA;NA;NA
OTU0292	0	0	0	0	0	0	0	0	0	0	0	0	0	0	0	0	0	0	0	0	0	0	0	0	0	0	0	0	0	0	0	0	0	0	290	0	0	0	0	0	0	0	Archaea;NA;NA;NA;NA;NA
OTU0290	0	0	0	0	0	0	0	0	0	0	0	0	0	0	0	0	0	0	0	0	0	0	0	0	0	0	0	0	0	0	0	0	0	0	292	0	0	0	0	0	0	0	Archaea;NA;NA;NA;NA;NA
OTU0282	0	0	0	0	0	0	0	0	0	0	0	0	0	0	0	0	0	0	0	0	0	0	0	0	0	0	0	0	0	0	0	0	0	0	305	0	0	0	0	0	0	0	Archaea;NA;NA;NA;NA;NA
OTU0269	0	0	0	0	0	0	0	0	0	0	0	0	0	0	0	0	0	0	0	0	0	0	0	0	0	0	0	0	0	0	0	0	0	0	322	0	0	0	0	0	0	0	Archaea;NA;NA;NA;NA;NA
OTU0270	0	0	0	0	0	0	0	0	0	0	0	0	0	0	0	0	0	0	0	0	0	0	0	0	0	0	0	0	0	0	0	0	0	0	322	0	0	0	0	0	0	0	Archaea;NA;NA;NA;NA;NA
OTU0260	0	0	0	0	0	0	0	0	0	0	0	0	0	0	0	0	0	0	0	0	0	0	0	0	0	0	0	0	0	0	0	0	0	0	332	0	0	0	0	0	0	0	Archaea;NA;NA;NA;NA;NA
OTU0243	0	0	0	0	0	0	0	0	0	0	0	0	0	0	0	0	0	0	0	0	0	0	0	0	0	0	0	0	0	0	0	0	0	0	366	0	0	0	0	0	0	0	Archaea;NA;NA;NA;NA;NA
OTU0239	0	0	0	0	0	0	0	0	0	0	0	0	0	0	0	0	0	0	0	0	0	0	0	0	0	0	0	0	0	0	0	0	0	0	373	0	0	0	0	0	0	0	Archaea;NA;NA;NA;NA;NA
OTU0235	0	0	0	0	0	0	0	0	0	0	0	0	0	0	0	0	0	0	0	0	0	0	0	0	0	0	0	0	0	0	0	0	0	0	381	0	0	0	0	0	0	0	Archaea;NA;NA;NA;NA;NA
OTU0234	0	0	0	0	0	0	0	0	0	0	0	0	0	0	0	0	0	0	0	0	0	0	0	0	0	0	0	0	0	0	0	0	0	0	384	0	0	0	0	0	0	0	Archaea;NA;NA;NA;NA;NA
OTU0208	0	0	0	0	0	0	0	0	0	0	0	0	0	0	0	0	0	0	0	0	0	0	0	0	0	0	0	0	0	0	0	0	0	0	441	0	0	0	0	0	0	0	Archaea;NA;NA;NA;NA;NA
OTU0199	0	0	0	0	0	0	0	0	0	0	0	0	0	0	0	0	0	0	0	0	0	0	0	0	0	0	0	0	0	0	0	0	0	0	475	0	0	0	0	0	0	0	Archaea;NA;NA;NA;NA;NA
OTU0196	0	0	0	0	0	0	0	0	0	0	0	0	0	0	0	0	0	0	0	0	0	0	0	0	0	0	0	0	0	0	0	0	0	0	481	0	0	0	0	0	0	0	Archaea;NA;NA;NA;NA;NA
OTU0192	0	0	0	0	0	0	0	0	0	0	0	0	0	0	0	0	0	0	0	0	0	0	0	0	0	0	0	0	0	0	0	0	0	0	484	0	0	0	0	0	0	0	Archaea;NA;NA;NA;NA;NA
OTU0187	0	0	0	0	0	0	0	0	0	0	0	0	0	0	0	0	0	0	0	0	0	0	0	0	0	0	0	0	0	0	0	0	0	0	498	0	0	0	0	0	0	0	Archaea;NA;NA;NA;NA;NA
OTU0181	0	0	0	0	0	0	0	0	0	0	0	0	0	0	0	0	0	0	0	0	0	0	0	0	0	0	0	0	0	0	0	0	0	0	505	0	0	0	0	0	0	0	Archaea;NA;NA;NA;NA;NA
OTU0176	0	0	0	0	0	0	0	0	0	0	0	0	0	0	0	0	0	0	0	0	0	0	0	0	0	0	0	0	0	0	0	0	0	0	519	0	0	0	0	0	0	0	Archaea;NA;NA;NA;NA;NA
OTU0172	0	0	0	0	0	0	0	0	0	0	0	0	0	0	0	0	0	0	0	0	0	0	0	0	0	0	0	0	0	0	0	0	0	0	544	0	0	0	0	0	0	0	Archaea;NA;NA;NA;NA;NA
OTU0161	0	0	0	0	0	0	0	0	0	0	0	0	0	0	0	0	0	0	0	0	0	0	0	0	0	0	0	0	0	0	0	0	0	0	576	0	0	0	0	0	0	0	Archaea;NA;NA;NA;NA;NA
OTU0160	0	0	0	0	0	0	0	0	0	0	0	0	0	0	0	0	0	0	0	0	0	0	0	0	0	0	0	0	0	0	0	0	0	0	610	0	0	0	0	0	0	0	Archaea;NA;NA;NA;NA;NA
OTU0142	0	0	0	0	0	0	0	0	0	0	0	0	0	0	0	0	0	0	0	0	0	0	0	0	0	0	0	0	0	0	0	0	0	0	759	0	0	0	0	0	0	0	Archaea;NA;NA;NA;NA;NA
OTU0136	0	0	0	0	0	0	0	0	0	0	0	0	0	0	0	0	0	0	0	0	0	0	0	0	0	0	0	0	0	0	0	0	0	0	830	0	0	0	0	0	0	0	Archaea;NA;NA;NA;NA;NA
OTU0134	0	0	0	0	0	0	0	0	0	0	0	0	0	0	0	0	0	0	0	0	0	0	0	0	0	0	0	0	0	0	0	0	0	0	840	0	0	0	0	0	0	0	Archaea;NA;NA;NA;NA;NA
OTU0133	0	0	0	0	0	0	0	0	0	0	0	0	0	0	0	0	0	0	0	0	0	0	0	0	0	0	0	0	0	0	0	0	0	0	844	0	0	0	0	0	0	0	Archaea;NA;NA;NA;NA;NA
OTU0108	0	0	0	0	0	0	0	0	0	0	0	0	0	0	0	0	0	0	0	0	0	0	0	0	0	0	0	0	0	0	0	0	0	0	1195	0	0	0	0	0	0	0	Archaea;NA;NA;NA;NA;NA
OTU0003	0	0	0	0	0	0	0	0	0	0	0	0	0	0	0	0	0	0	0	0	0	0	0	0	0	0	0	0	115	0	0	0	0	0	141583	0	0	0	0	0	0	0	Archaea;NA;NA;NA;NA;NA
OTU1003	0	0	0	0	0	0	0	0	0	0	0	0	0	0	0	0	0	0	0	0	0	0	0	0	0	0	0	0	0	0	6	0	0	0	0	0	0	0	0	0	0	0	Archaea;Thaumarchaeota;Marine_Group_I;NA;NA;NA
OTU0767	0	0	0	0	0	0	0	0	0	0	0	0	0	0	0	23	0	0	0	0	0	0	0	0	0	0	0	0	0	0	0	0	0	0	0	0	0	0	0	0	0	0	Archaea;Thaumarchaeota;Soil_Crenarchaeotic_Group(SCG);NA;NA;NA
OTU0669	0	0	0	0	0	0	0	0	0	0	0	0	0	0	0	37	0	0	0	0	0	0	0	0	0	0	0	0	0	0	0	0	0	0	0	0	0	0	0	0	0	0	Archaea;Thaumarchaeota;Soil_Crenarchaeotic_Group(SCG);NA;NA;NA
OTU0617	0	0	0	0	0	0	0	0	0	0	0	0	0	0	0	0	0	0	0	47	0	0	0	0	0	0	0	0	0	0	0	0	0	0	0	0	0	0	0	0	0	0	Archaea;Thaumarchaeota;Soil_Crenarchaeotic_Group(SCG);NA;NA;NA
OTU0347	0	0	0	0	0	0	0	0	0	0	0	0	0	0	0	214	0	0	0	0	0	0	0	0	0	0	0	0	0	0	0	0	0	0	0	0	0	0	0	0	0	0	Archaea;Thaumarchaeota;Soil_Crenarchaeotic_Group(SCG);NA;NA;NA
OTU0327	0	0	0	0	0	0	0	0	0	0	0	0	0	0	0	0	247	0	0	0	0	0	0	0	0	0	0	0	0	0	0	0	0	0	0	0	0	0	0	0	0	0	Archaea;Thaumarchaeota;Soil_Crenarchaeotic_Group(SCG);NA;NA;NA
OTU0319	0	0	0	0	0	0	0	0	0	0	0	0	0	0	0	255	0	0	0	0	0	0	0	0	0	0	0	0	0	0	0	0	0	0	0	0	0	0	0	0	0	0	Archaea;Thaumarchaeota;Soil_Crenarchaeotic_Group(SCG);NA;NA;NA
OTU0315	0	0	0	0	0	0	0	0	0	0	0	0	0	0	0	264	0	0	0	0	0	0	0	0	0	0	0	0	0	0	0	0	0	0	0	0	0	0	0	0	0	0	Archaea;Thaumarchaeota;Soil_Crenarchaeotic_Group(SCG);NA;NA;NA
OTU0311	0	0	0	0	0	0	0	0	0	0	0	0	0	0	0	267	0	0	0	0	0	0	0	0	0	0	0	0	0	0	0	0	0	0	0	0	0	0	0	0	0	0	Archaea;Thaumarchaeota;Soil_Crenarchaeotic_Group(SCG);NA;NA;NA
OTU0309	0	0	0	0	0	0	0	0	0	0	0	0	0	0	0	274	0	0	0	0	0	0	0	0	0	0	0	0	0	0	0	0	0	0	0	0	0	0	0	0	0	0	Archaea;Thaumarchaeota;Soil_Crenarchaeotic_Group(SCG);NA;NA;NA
OTU0308	0	0	0	0	0	0	0	0	0	0	0	0	0	0	0	0	0	0	0	276	0	0	0	0	0	0	0	0	0	0	0	0	0	0	0	0	0	0	0	0	0	0	Archaea;Thaumarchaeota;Soil_Crenarchaeotic_Group(SCG);NA;NA;NA
OTU0288	0	0	0	0	0	0	0	0	0	0	0	0	0	0	0	297	0	0	0	0	0	0	0	0	0	0	0	0	0	0	0	0	0	0	0	0	0	0	0	0	0	0	Archaea;Thaumarchaeota;Soil_Crenarchaeotic_Group(SCG);NA;NA;NA
OTU0286	0	0	0	0	0	0	0	0	0	0	0	0	0	0	0	299	0	0	0	0	0	0	0	0	0	0	0	0	0	0	0	0	0	0	0	0	0	0	0	0	0	0	Archaea;Thaumarchaeota;Soil_Crenarchaeotic_Group(SCG);NA;NA;NA
OTU0280	0	0	0	0	0	0	0	0	0	0	0	0	0	0	0	0	0	0	0	306	0	0	0	0	0	0	0	0	0	0	0	0	0	0	0	0	0	0	0	0	0	0	Archaea;Thaumarchaeota;Soil_Crenarchaeotic_Group(SCG);NA;NA;NA
OTU0277	0	0	0	0	0	0	0	0	0	0	0	0	0	0	0	314	0	0	0	0	0	0	0	0	0	0	0	0	0	0	0	0	0	0	0	0	0	0	0	0	0	0	Archaea;Thaumarchaeota;Soil_Crenarchaeotic_Group(SCG);NA;NA;NA
OTU0278	0	0	0	0	0	0	0	0	0	0	0	0	0	0	0	0	0	0	0	314	0	0	0	0	0	0	0	0	0	0	0	0	0	0	0	0	0	0	0	0	0	0	Archaea;Thaumarchaeota;Soil_Crenarchaeotic_Group(SCG);NA;NA;NA
OTU0274	0	0	0	0	0	0	0	0	0	0	0	0	0	0	0	317	0	0	0	0	0	0	0	0	0	0	0	0	0	0	0	0	0	0	0	0	0	0	0	0	0	0	Archaea;Thaumarchaeota;Soil_Crenarchaeotic_Group(SCG);NA;NA;NA
OTU0267	0	0	0	0	0	0	0	0	0	0	0	0	0	0	0	322	0	0	0	0	0	0	0	0	0	0	0	0	0	0	0	0	0	0	0	0	0	0	0	0	0	0	Archaea;Thaumarchaeota;Soil_Crenarchaeotic_Group(SCG);NA;NA;NA
OTU0263	0	0	0	0	0	0	0	0	0	0	0	0	0	0	0	330	0	0	0	0	0	0	0	0	0	0	0	0	0	0	0	0	0	0	0	0	0	0	0	0	0	0	Archaea;Thaumarchaeota;Soil_Crenarchaeotic_Group(SCG);NA;NA;NA
OTU0205	0	0	0	0	0	0	0	0	0	0	0	0	0	0	0	0	0	0	0	459	0	0	0	0	0	0	0	0	0	0	0	0	0	0	0	0	0	0	0	0	0	0	Archaea;Thaumarchaeota;Soil_Crenarchaeotic_Group(SCG);NA;NA;NA
OTU0195	0	0	0	0	0	0	0	0	0	0	0	0	0	0	0	481	0	0	0	0	0	0	0	0	0	0	0	0	0	0	0	0	0	0	0	0	0	0	0	0	0	0	Archaea;Thaumarchaeota;Soil_Crenarchaeotic_Group(SCG);NA;NA;NA
OTU0179	0	0	0	0	0	0	0	0	0	0	0	0	0	0	0	505	0	0	0	0	0	0	0	0	0	0	0	0	0	0	0	0	0	0	0	0	0	0	0	0	0	0	Archaea;Thaumarchaeota;Soil_Crenarchaeotic_Group(SCG);NA;NA;NA
OTU0178	0	0	0	0	0	0	0	0	0	0	0	0	0	0	0	0	0	0	0	510	0	0	0	0	0	0	0	0	0	0	0	0	0	0	0	0	0	0	0	0	0	0	Archaea;Thaumarchaeota;Soil_Crenarchaeotic_Group(SCG);NA;NA;NA
OTU0175	0	0	0	0	0	0	0	0	0	0	0	0	0	0	0	0	527	0	0	0	0	0	0	0	0	0	0	0	0	0	0	0	0	0	0	0	0	0	0	0	0	0	Archaea;Thaumarchaeota;Soil_Crenarchaeotic_Group(SCG);NA;NA;NA
OTU0122	0	0	0	0	0	0	0	0	0	0	0	0	0	0	0	963	0	0	0	0	0	0	0	0	0	0	0	0	0	0	0	0	0	0	0	0	0	0	0	0	0	0	Archaea;Thaumarchaeota;Soil_Crenarchaeotic_Group(SCG);NA;NA;NA
OTU0099	0	0	0	0	0	0	0	0	0	0	0	0	0	0	0	1276	0	0	0	0	0	0	0	0	0	0	0	0	0	0	0	0	0	0	0	0	0	0	0	0	0	0	Archaea;Thaumarchaeota;Soil_Crenarchaeotic_Group(SCG);NA;NA;NA
OTU0072	0	0	0	0	0	0	0	0	0	0	0	0	0	0	0	0	0	0	0	2068	0	0	0	0	0	0	0	0	0	0	0	0	0	0	0	0	0	0	0	0	0	0	Archaea;Thaumarchaeota;Soil_Crenarchaeotic_Group(SCG);NA;NA;NA
OTU0050	0	0	0	0	0	0	0	0	0	0	0	0	0	0	0	4209	0	0	0	0	0	0	0	0	0	0	0	0	0	0	0	0	0	0	0	0	0	0	0	0	0	0	Archaea;Thaumarchaeota;Soil_Crenarchaeotic_Group(SCG);NA;NA;NA
OTU0004	0	0	0	0	0	0	0	0	0	0	0	0	49	0	0	0	27396	0	0	107758	0	0	0	0	0	0	0	0	0	0	0	0	0	0	0	0	2	16	0	0	0	0	Archaea;Thaumarchaeota;Soil_Crenarchaeotic_Group(SCG);NA;NA;NA
OTU1104	0	1	0	0	0	0	0	0	0	0	0	0	0	0	0	0	0	0	0	0	0	0	0	0	0	0	0	0	0	0	0	0	0	0	0	0	0	0	0	0	0	0	Archaea;Woesearchaeota_(DHVEG-6);NA;NA;NA;NA
OTU1105	0	1	0	0	0	0	0	0	0	0	0	0	0	0	0	0	0	0	0	0	0	0	0	0	0	0	0	0	0	0	0	0	0	0	0	0	0	0	0	0	0	0	Archaea;Woesearchaeota_(DHVEG-6);NA;NA;NA;NA
OTU1006	0	5	0	0	0	0	0	0	0	0	0	0	0	0	0	0	0	0	0	0	0	0	0	0	0	0	0	0	0	0	0	0	0	0	0	0	0	0	0	0	0	0	Archaea;Woesearchaeota_(DHVEG-6);NA;NA;NA;NA
OTU1008	0	0	0	0	0	0	0	0	0	0	0	0	5	0	0	0	0	0	0	0	0	0	0	0	0	0	0	0	0	0	0	0	0	0	0	0	0	0	0	0	0	0	Archaea;Woesearchaeota_(DHVEG-6);NA;NA;NA;NA
OTU0849	0	0	0	0	0	0	0	0	0	0	0	0	0	0	0	0	0	0	0	0	0	0	0	0	0	0	0	0	0	0	0	0	0	0	0	0	0	0	0	0	0	0	Archaea;Woesearchaeota_(DHVEG-6);NA;NA;NA;NA
OTU0609	0	0	0	0	0	0	0	0	0	0	0	0	49	0	0	0	0	0	0	0	0	0	0	0	0	0	0	0	0	0	0	0	0	0	0	0	0	0	0	0	0	0	Archaea;Woesearchaeota_(DHVEG-6);NA;NA;NA;NA
OTU0610	0	0	0	0	0	0	0	0	0	0	0	0	49	0	0	0	0	0	0	0	0	0	0	0	0	0	0	0	0	0	0	0	0	0	0	0	0	0	0	0	0	0	Archaea;Woesearchaeota_(DHVEG-6);NA;NA;NA;NA
OTU0583	0	0	0	0	0	0	0	0	0	0	0	0	0	0	0	0	0	0	0	0	0	0	0	0	0	0	0	0	0	0	0	0	0	0	0	0	0	0	56	0	0	0	Archaea;Woesearchaeota_(DHVEG-6);NA;NA;NA;NA
OTU0487	0	0	0	0	0	0	0	0	0	0	0	0	101	0	0	0	0	0	0	0	0	0	0	0	0	0	0	0	0	0	0	0	0	0	0	0	0	0	0	0	0	0	Archaea;Woesearchaeota_(DHVEG-6);NA;NA;NA;NA
OTU0463	0	115	0	0	0	0	0	0	0	0	0	0	0	0	0	0	0	0	0	0	0	0	0	0	0	0	0	0	0	0	0	0	0	0	0	0	0	0	0	0	0	0	Archaea;Woesearchaeota_(DHVEG-6);NA;NA;NA;NA
OTU0441	0	0	0	0	0	0	0	0	0	0	0	0	0	0	0	0	0	0	0	0	0	0	0	0	0	0	0	0	0	0	0	0	0	0	126	0	0	0	0	0	0	0	Archaea;Woesearchaeota_(DHVEG-6);NA;NA;NA;NA
OTU0421	0	137	0	0	0	0	0	0	0	0	0	0	0	0	0	0	0	0	0	0	0	0	0	0	0	0	0	0	0	0	0	0	0	0	0	0	0	0	0	0	0	0	Archaea;Woesearchaeota_(DHVEG-6);NA;NA;NA;NA
OTU0422	0	137	0	0	0	0	0	0	0	0	0	0	0	0	0	0	0	0	0	0	0	0	0	0	0	0	0	0	0	0	0	0	0	0	0	0	0	0	0	0	0	0	Archaea;Woesearchaeota_(DHVEG-6);NA;NA;NA;NA
OTU0379	0	185	0	0	0	0	0	0	0	0	0	0	0	0	0	0	0	0	0	0	0	0	0	0	0	0	0	0	0	0	0	0	0	0	0	0	0	0	0	0	0	0	Archaea;Woesearchaeota_(DHVEG-6);NA;NA;NA;NA
OTU0370	0	192	0	0	0	0	0	0	0	0	0	0	0	0	0	0	0	0	0	0	0	0	0	0	0	0	0	0	0	0	0	0	0	0	0	0	0	0	0	0	0	0	Archaea;Woesearchaeota_(DHVEG-6);NA;NA;NA;NA
OTU0365	0	196	0	0	0	0	0	0	0	0	0	0	0	0	0	0	0	0	0	0	0	0	0	0	0	0	0	0	0	0	0	0	0	0	0	0	0	0	0	0	0	0	Archaea;Woesearchaeota_(DHVEG-6);NA;NA;NA;NA
OTU0358	0	207	0	0	0	0	0	0	0	0	0	0	0	0	0	0	0	0	0	0	0	0	0	0	0	0	0	0	0	0	0	0	0	0	0	0	0	0	0	0	0	0	Archaea;Woesearchaeota_(DHVEG-6);NA;NA;NA;NA
OTU0353	0	209	0	0	0	0	0	0	0	0	0	0	0	0	0	0	0	0	0	0	0	0	0	0	0	0	0	0	0	0	0	0	0	0	0	0	0	0	0	0	0	0	Archaea;Woesearchaeota_(DHVEG-6);NA;NA;NA;NA
OTU0351	0	211	0	0	0	0	0	0	0	0	0	0	0	0	0	0	0	0	0	0	0	0	0	0	0	0	0	0	0	0	0	0	0	0	0	0	0	0	0	0	0	0	Archaea;Woesearchaeota_(DHVEG-6);NA;NA;NA;NA
OTU0344	0	219	0	0	0	0	0	0	0	0	0	0	0	0	0	0	0	0	0	0	0	0	0	0	0	0	0	0	0	0	0	0	0	0	0	0	0	0	0	0	0	0	Archaea;Woesearchaeota_(DHVEG-6);NA;NA;NA;NA
OTU0339	0	0	0	0	0	0	0	0	0	0	0	0	231	0	0	0	0	0	0	0	0	0	0	0	0	0	0	0	0	0	0	0	0	0	0	0	0	0	0	0	0	0	Archaea;Woesearchaeota_(DHVEG-6);NA;NA;NA;NA
OTU0336	0	233	0	0	0	0	0	0	0	0	0	0	0	0	0	0	0	0	0	0	0	0	0	0	0	0	0	0	0	0	0	0	0	0	0	0	0	0	0	0	0	0	Archaea;Woesearchaeota_(DHVEG-6);NA;NA;NA;NA
OTU0329	0	0	0	0	0	0	0	0	0	0	0	0	243	0	0	0	0	0	0	0	0	0	0	0	0	0	0	0	0	0	0	0	0	0	0	0	0	0	0	0	0	0	Archaea;Woesearchaeota_(DHVEG-6);NA;NA;NA;NA
OTU0325	0	0	0	0	0	0	0	0	0	0	0	0	247	0	0	0	0	0	0	0	0	0	0	0	0	0	0	0	0	0	0	0	0	0	0	0	0	0	0	0	0	0	Archaea;Woesearchaeota_(DHVEG-6);NA;NA;NA;NA
OTU0326	0	0	0	0	0	0	0	0	0	0	0	0	247	0	0	0	0	0	0	0	0	0	0	0	0	0	0	0	0	0	0	0	0	0	0	0	0	0	0	0	0	0	Archaea;Woesearchaeota_(DHVEG-6);NA;NA;NA;NA
OTU0324	0	0	0	0	0	0	0	0	0	0	0	0	248	0	0	0	0	0	0	0	0	0	0	0	0	0	0	0	0	0	0	0	0	0	0	0	0	0	0	0	0	0	Archaea;Woesearchaeota_(DHVEG-6);NA;NA;NA;NA
OTU0322	0	0	0	0	0	0	0	0	0	0	0	0	251	0	0	0	0	0	0	0	0	0	0	0	0	0	0	0	0	0	0	0	0	0	0	0	0	0	0	0	0	0	Archaea;Woesearchaeota_(DHVEG-6);NA;NA;NA;NA
OTU0318	0	0	0	0	0	0	0	0	0	0	0	0	255	0	0	0	0	0	0	0	0	0	0	0	0	0	0	0	0	0	0	0	0	0	0	0	0	0	0	0	0	0	Archaea;Woesearchaeota_(DHVEG-6);NA;NA;NA;NA
OTU0316	0	0	0	0	0	0	0	0	0	0	0	0	261	0	0	0	0	0	0	0	0	0	0	0	0	0	0	0	0	0	0	0	0	0	0	0	0	0	0	0	0	0	Archaea;Woesearchaeota_(DHVEG-6);NA;NA;NA;NA
OTU0305	0	0	0	0	0	0	0	0	0	0	0	0	278	0	0	0	0	0	0	0	0	0	0	0	0	0	0	0	0	0	0	0	0	0	0	0	0	0	0	0	0	0	Archaea;Woesearchaeota_(DHVEG-6);NA;NA;NA;NA
OTU0300	0	0	0	0	0	0	0	0	0	0	0	0	282	0	0	0	0	0	0	0	0	0	0	0	0	0	0	0	0	0	0	0	0	0	0	0	0	0	0	0	0	0	Archaea;Woesearchaeota_(DHVEG-6);NA;NA;NA;NA
OTU0289	0	292	0	0	0	0	0	0	0	0	0	0	0	0	0	0	0	0	0	0	0	0	0	0	0	0	0	0	0	0	0	0	0	0	0	0	0	0	0	0	0	0	Archaea;Woesearchaeota_(DHVEG-6);NA;NA;NA;NA
OTU0281	0	0	0	0	0	0	0	0	0	0	0	0	305	0	0	0	0	0	0	0	0	0	0	0	0	0	0	0	0	0	0	0	0	0	0	0	0	0	0	0	0	0	Archaea;Woesearchaeota_(DHVEG-6);NA;NA;NA;NA
OTU0272	0	0	0	0	0	0	0	0	0	0	0	0	318	0	0	0	0	0	0	0	0	0	0	0	0	0	0	0	0	0	0	0	0	0	0	0	0	0	0	0	0	0	Archaea;Woesearchaeota_(DHVEG-6);NA;NA;NA;NA
OTU0257	0	0	0	0	0	0	0	0	0	0	0	0	335	0	0	0	0	0	0	0	0	0	0	0	0	0	0	0	0	0	0	0	0	0	0	0	0	0	0	0	0	0	Archaea;Woesearchaeota_(DHVEG-6);NA;NA;NA;NA
OTU0247	0	0	0	0	0	0	0	0	0	0	0	0	352	0	0	0	0	0	0	0	0	0	0	0	0	0	0	0	0	0	0	0	0	0	0	0	0	0	0	0	0	0	Archaea;Woesearchaeota_(DHVEG-6);NA;NA;NA;NA
OTU0194	0	0	0	0	0	0	0	0	0	0	0	0	482	0	0	0	0	0	0	0	0	0	0	0	0	0	0	0	0	0	0	0	0	0	0	0	0	0	0	0	0	0	Archaea;Woesearchaeota_(DHVEG-6);NA;NA;NA;NA
OTU0186	0	0	0	0	0	0	0	0	0	0	0	0	499	0	0	0	0	0	0	0	0	0	0	0	0	0	0	0	0	0	0	0	0	0	0	0	0	0	0	0	0	0	Archaea;Woesearchaeota_(DHVEG-6);NA;NA;NA;NA
OTU0156	0	0	0	0	0	0	0	0	0	0	0	0	655	0	0	0	0	0	0	0	0	0	0	0	0	0	0	0	0	0	0	0	0	0	0	0	0	0	0	0	0	0	Archaea;Woesearchaeota_(DHVEG-6);NA;NA;NA;NA
OTU0137	0	0	0	0	0	0	0	0	0	0	0	0	798	0	0	0	0	0	0	0	0	0	0	0	0	0	0	0	0	0	0	0	0	0	0	0	0	0	0	0	0	0	Archaea;Woesearchaeota_(DHVEG-6);NA;NA;NA;NA
OTU0124	0	951	0	0	0	0	0	0	0	0	0	0	0	0	0	0	0	0	0	0	0	0	0	0	0	0	0	0	0	0	0	0	0	0	0	0	0	0	0	0	0	0	Archaea;Woesearchaeota_(DHVEG-6);NA;NA;NA;NA
OTU0121	0	977	0	0	0	0	0	0	0	0	0	0	0	0	0	0	0	0	0	0	0	0	0	0	0	0	0	0	0	0	0	0	0	0	0	0	0	0	0	0	0	0	Archaea;Woesearchaeota_(DHVEG-6);NA;NA;NA;NA
OTU0116	0	0	0	0	0	0	0	0	0	0	0	0	0	0	0	0	0	0	0	0	0	0	0	0	0	0	0	0	0	0	0	0	0	0	0	1002	0	0	0	0	0	0	Archaea;Woesearchaeota_(DHVEG-6);NA;NA;NA;NA
OTU0109	0	0	0	0	0	0	0	0	0	0	0	0	1193	0	0	0	0	0	0	0	0	0	0	0	0	0	0	0	0	0	0	0	0	0	0	0	0	0	0	0	0	0	Archaea;Woesearchaeota_(DHVEG-6);NA;NA;NA;NA
OTU0070	0	0	0	0	0	0	0	0	0	0	0	0	2131	0	0	0	0	0	0	0	0	0	0	0	0	0	0	0	0	0	0	0	0	0	0	0	0	0	0	0	0	0	Archaea;Woesearchaeota_(DHVEG-6);NA;NA;NA;NA
OTU0035	0	0	0	0	0	0	0	0	0	0	0	0	6970	0	0	0	0	0	0	0	0	0	0	0	0	0	0	0	0	0	0	0	0	0	0	0	0	0	0	0	0	0	Archaea;Woesearchaeota_(DHVEG-6);NA;NA;NA;NA
OTU0018	0	25566	0	0	0	0	0	0	0	0	0	0	0	0	0	0	0	0	0	0	0	0	0	0	0	0	0	0	0	0	0	0	0	0	0	0	0	0	0	0	0	0	Archaea;Woesearchaeota_(DHVEG-6);NA;NA;NA;NA
OTU0010	0	73075	0	0	0	0	0	0	0	0	0	0	0	0	0	0	0	0	0	0	0	7	0	0	0	0	0	0	0	0	0	0	0	0	0	0	0	0	69	0	0	0	Archaea;Woesearchaeota_(DHVEG-6);NA;NA;NA;NA
OTU0009	0	0	0	0	0	0	0	0	0	0	0	0	87913	0	0	0	0	0	0	0	0	4	0	0	0	0	0	0	0	0	0	0	0	0	0	0	0	0	0	0	0	0	Archaea;Woesearchaeota_(DHVEG-6);NA;NA;NA;NA
	580	102909	229	35817	160	129876	111440	119864	702	482	1302	51549	104755	99011	4107	10655	28177	2010	4945	111738	73879	14943	95582	74979	80596	50183	2416	86018	80898	74511	94749	55396	90887	93479	162723	1011	1032	475	125	112419	1081	127939

## Sheet: biom_PCR8
Supplementary table 1d - biom table obtained after DADA2 analysis from the primer pair 515F-806uR
#OTU ID	oral-8	appendix-8	nose-8	skin-8	stool-8	taxonomy
OTU1032	0	0	0	0	30	Archaea;Euryarchaeota;Methanobacteria;Methanobacteriales;Methanobacteriaceae;Methanosphaera
OTU0959	0	0	35	0	0	Bacteria;Acidobacteria;Solibacteres;Solibacterales;Solibacteraceae_(Subgroup_3);Bryobacter
OTU0536	0	0	86	0	0	Bacteria;Acidobacteria;Subgroup_2;NA;NA;NA
OTU0882	0	0	0	0	0	Bacteria;Acidobacteria;Subgroup_2;NA;NA;NA
OTU1158	0	0	17	0	0	Bacteria;Acidobacteria;Subgroup_22;NA;NA;NA
OTU0949	0	0	7	0	0	Bacteria;Acidobacteria;Subgroup_6;NA;NA;NA
OTU1022	0	0	0	0	0	Bacteria;Acidobacteria;Subgroup_6;NA;NA;NA
OTU1217	0	0	13	0	0	Bacteria;Acidobacteria;Subgroup_6;NA;NA;NA
OTU1261	0	0	10	0	0	Bacteria;Acidobacteria;Subgroup_6;NA;NA;NA
OTU0770	0	0	0	0	0	Bacteria;Actinobacteria;Acidimicrobiia;Acidimicrobiales;Acidimicrobiaceae;CL500-29_marine_group
OTU1015	0	0	31	0	0	Bacteria;Actinobacteria;Acidimicrobiia;Acidimicrobiales;Acidimicrobiaceae;Ilumatobacter
OTU1028	0	0	0	0	0	Bacteria;Actinobacteria;Acidimicrobiia;Acidimicrobiales;Acidimicrobiaceae;Ilumatobacter
OTU1030	0	0	0	0	0	Bacteria;Actinobacteria;Acidimicrobiia;Acidimicrobiales;Acidimicrobiaceae;Ilumatobacter
OTU0758	0	0	0	0	0	Bacteria;Actinobacteria;Acidimicrobiia;Acidimicrobiales;Acidimicrobiaceae;NA
OTU1285	0	0	8	0	0	Bacteria;Actinobacteria;Acidimicrobiia;Acidimicrobiales;Acidimicrobiaceae;NA
OTU1010	0	0	0	32	0	Bacteria;Actinobacteria;Acidimicrobiia;Acidimicrobiales;NA;NA
OTU1167	0	0	0	0	0	Bacteria;Actinobacteria;Acidimicrobiia;Acidimicrobiales;NA;NA
OTU1173	0	0	16	0	0	Bacteria;Actinobacteria;Acidimicrobiia;Acidimicrobiales;NA;NA
OTU0925	0	0	0	0	0	Bacteria;Actinobacteria;Acidimicrobiia;Acidimicrobiales;Sva0996_marine_group;NA
OTU0076	818	0	0	173	0	Bacteria;Actinobacteria;Actinobacteria;Actinomycetales;Actinomycetaceae;Actinomyces
OTU0381	0	0	0	171	0	Bacteria;Actinobacteria;Actinobacteria;Actinomycetales;Actinomycetaceae;Actinomyces
OTU0590	0	0	0	95	0	Bacteria;Actinobacteria;Actinobacteria;Actinomycetales;Actinomycetaceae;Actinomyces
OTU0651	0	0	0	0	0	Bacteria;Actinobacteria;Actinobacteria;Actinomycetales;Actinomycetaceae;Actinomyces
OTU0266	75	0	0	0	0	Bacteria;Actinobacteria;Actinobacteria;Actinomycetales;Actinomycetaceae;Actinomyces
OTU0842	0	0	0	47	0	Bacteria;Actinobacteria;Actinobacteria;Actinomycetales;Actinomycetaceae;Actinomyces
OTU0903	40	0	0	0	0	Bacteria;Actinobacteria;Actinobacteria;Actinomycetales;Actinomycetaceae;Actinomyces
OTU1069	0	0	26	0	0	Bacteria;Actinobacteria;Actinobacteria;Actinomycetales;Actinomycetaceae;Actinomyces
OTU0908	0	0	0	0	0	Bacteria;Actinobacteria;Actinobacteria;Actinomycetales;Actinomycetaceae;Mobiluncus
OTU0689	69	0	0	0	0	Bacteria;Actinobacteria;Actinobacteria;Actinomycetales;Actinomycetaceae;NA
OTU0027	0	0	0	0	2876	Bacteria;Actinobacteria;Actinobacteria;Bifidobacteriales;Bifidobacteriaceae;Bifidobacterium
OTU0451	0	0	0	0	69	Bacteria;Actinobacteria;Actinobacteria;Bifidobacteriales;Bifidobacteriaceae;Bifidobacterium
OTU0741	0	0	0	0	34	Bacteria;Actinobacteria;Actinobacteria;Bifidobacteriales;Bifidobacteriaceae;Bifidobacterium
OTU1114	0	0	21	0	0	Bacteria;Actinobacteria;Actinobacteria;Bifidobacteriales;Bifidobacteriaceae;Gardnerella
OTU0835	0	0	0	0	0	Bacteria;Actinobacteria;Actinobacteria;Bifidobacteriales;Bifidobacteriaceae;NA
OTU0329	249	0	0	0	0	Bacteria;Actinobacteria;Actinobacteria;Bifidobacteriales;Bifidobacteriaceae;Scardovia
OTU0114	198	0	0	577	0	Bacteria;Actinobacteria;Actinobacteria;Corynebacteriales;Corynebacteriaceae;Corynebacterium
OTU0214	0	203	0	0	0	Bacteria;Actinobacteria;Actinobacteria;Corynebacteriales;Corynebacteriaceae;Corynebacterium
OTU0303	0	0	39	0	0	Bacteria;Actinobacteria;Actinobacteria;Corynebacteriales;Corynebacteriaceae;Corynebacterium
OTU0701	0	0	0	67	0	Bacteria;Actinobacteria;Actinobacteria;Corynebacteriales;Corynebacteriaceae;Corynebacterium
OTU0012	0	0	6377	0	0	Bacteria;Actinobacteria;Actinobacteria;Corynebacteriales;Corynebacteriaceae;Corynebacterium_1
OTU0010	0	0	0	0	0	Bacteria;Actinobacteria;Actinobacteria;Corynebacteriales;Corynebacteriaceae;Corynebacterium_1
OTU0025	0	0	2690	255	0	Bacteria;Actinobacteria;Actinobacteria;Corynebacteriales;Corynebacteriaceae;Corynebacterium_1
OTU0503	0	0	0	0	0	Bacteria;Actinobacteria;Actinobacteria;Corynebacteriales;Corynebacteriaceae;Corynebacterium_1
OTU0316	0	0	99	0	0	Bacteria;Actinobacteria;Actinobacteria;Corynebacteriales;Corynebacteriaceae;Corynebacterium_1
OTU0263	0	0	0	0	0	Bacteria;Actinobacteria;Actinobacteria;Corynebacteriales;Corynebacteriaceae;Corynebacterium_1
OTU1063	0	0	0	0	0	Bacteria;Actinobacteria;Actinobacteria;Corynebacteriales;Corynebacteriaceae;Corynebacterium_1
OTU0011	0	0	4384	406	0	Bacteria;Actinobacteria;Actinobacteria;Corynebacteriales;Corynebacteriaceae;Lawsonella
OTU0135	0	0	392	0	0	Bacteria;Actinobacteria;Actinobacteria;Corynebacteriales;Corynebacteriaceae;Lawsonella
OTU0890	0	0	0	0	0	Bacteria;Actinobacteria;Actinobacteria;Corynebacteriales;Nocardiaceae;Rhodococcus
OTU0825	0	0	0	0	0	Bacteria;Actinobacteria;Actinobacteria;Frankiales;NA;NA
OTU1093	0	0	24	0	0	Bacteria;Actinobacteria;Actinobacteria;Frankiales;NA;NA
OTU0869	0	0	0	0	0	Bacteria;Actinobacteria;Actinobacteria;Frankiales;Nakamurellaceae;Nakamurella
OTU1121	0	0	0	0	0	Bacteria;Actinobacteria;Actinobacteria;Micrococcales;Bogoriellaceae;Georgenia
OTU0050	0	0	0	0	0	Bacteria;Actinobacteria;Actinobacteria;Micrococcales;Brevibacteriaceae;Brevibacterium
OTU0130	0	0	0	0	0	Bacteria;Actinobacteria;Actinobacteria;Micrococcales;Brevibacteriaceae;Brevibacterium
OTU1219	0	0	13	0	0	Bacteria;Actinobacteria;Actinobacteria;Micrococcales;Cellulomonadaceae;Cellulomonas
OTU0128	0	0	0	0	0	Bacteria;Actinobacteria;Actinobacteria;Micrococcales;Dermabacteraceae;Brachybacterium
OTU0249	0	0	0	0	0	Bacteria;Actinobacteria;Actinobacteria;Micrococcales;Dermabacteraceae;Brachybacterium
OTU0052	0	0	0	0	0	Bacteria;Actinobacteria;Actinobacteria;Micrococcales;Dermacoccaceae;NA
OTU0057	0	0	0	0	0	Bacteria;Actinobacteria;Actinobacteria;Micrococcales;Intrasporangiaceae;Janibacter
OTU0866	0	0	21	0	0	Bacteria;Actinobacteria;Actinobacteria;Micrococcales;Intrasporangiaceae;Phycicoccus
OTU0553	0	0	0	0	0	Bacteria;Actinobacteria;Actinobacteria;Micrococcales;Microbacteriaceae;Microbacterium
OTU0486	0	0	0	0	0	Bacteria;Actinobacteria;Actinobacteria;Micrococcales;Microbacteriaceae;NA
OTU1016	0	0	31	0	0	Bacteria;Actinobacteria;Actinobacteria;Micrococcales;Microbacteriaceae;NA
OTU0094	0	0	0	0	0	Bacteria;Actinobacteria;Actinobacteria;Micrococcales;Microbacteriaceae;Zimmermannella
OTU0191	0	0	0	0	0	Bacteria;Actinobacteria;Actinobacteria;Micrococcales;Micrococcaceae;Citricoccus
OTU0947	0	0	36	0	0	Bacteria;Actinobacteria;Actinobacteria;Micrococcales;Micrococcaceae;Glutamicibacter
OTU0035	0	0	0	1358	0	Bacteria;Actinobacteria;Actinobacteria;Micrococcales;Micrococcaceae;Kocuria
OTU0859	0	0	0	45	0	Bacteria;Actinobacteria;Actinobacteria;Micrococcales;Micrococcaceae;Kocuria
OTU0029	0	0	0	2146	0	Bacteria;Actinobacteria;Actinobacteria;Micrococcales;Micrococcaceae;Micrococcus
OTU0562	0	0	0	103	0	Bacteria;Actinobacteria;Actinobacteria;Micrococcales;Micrococcaceae;Micrococcus
OTU0626	0	0	0	86	0	Bacteria;Actinobacteria;Actinobacteria;Micrococcales;Micrococcaceae;Micrococcus
OTU0269	257	0	0	0	0	Bacteria;Actinobacteria;Actinobacteria;Micrococcales;Micrococcaceae;Rothia
OTU0475	0	0	0	142	0	Bacteria;Actinobacteria;Actinobacteria;Micrococcales;Micrococcaceae;Rothia
OTU0771	0	0	0	0	0	Bacteria;Actinobacteria;Actinobacteria;Micrococcales;Micrococcaceae;Rothia
OTU0656	0	0	35	0	0	Bacteria;Actinobacteria;Actinobacteria;Micrococcales;Micrococcaceae;Rothia
OTU0782	0	0	0	0	0	Bacteria;Actinobacteria;Actinobacteria;Micrococcales;Rarobacteraceae;Rarobacter
OTU1132	0	0	0	0	0	Bacteria;Actinobacteria;Actinobacteria;NA;NA;NA
OTU1095	0	0	24	0	0	Bacteria;Actinobacteria;Actinobacteria;Propionibacteriales;Nocardioidaceae;Aeromicrobium
OTU0790	0	0	0	0	0	Bacteria;Actinobacteria;Actinobacteria;Propionibacteriales;Nocardioidaceae;Nocardioides
OTU1094	0	0	24	0	0	Bacteria;Actinobacteria;Actinobacteria;Propionibacteriales;Nocardioidaceae;Nocardioides
OTU0843	0	0	0	47	0	Bacteria;Actinobacteria;Actinobacteria;Propionibacteriales;Propionibacteriaceae;NA
OTU0033	0	0	90	1819	0	Bacteria;Actinobacteria;Actinobacteria;Propionibacteriales;Propionibacteriaceae;Propionibacterium
OTU0951	0	0	0	0	0	Bacteria;Actinobacteria;Actinobacteria;Pseudonocardiales;Pseudonocardiaceae;Pseudonocardia
OTU1218	0	0	13	0	0	Bacteria;Actinobacteria;Actinobacteria;Streptomycetales;Streptomycetaceae;Streptomyces
OTU0489	0	0	0	0	58	Bacteria;Actinobacteria;Coriobacteriia;Coriobacteriales;Coriobacteriaceae;Adlercreutzia
OTU0262	0	355	0	0	0	Bacteria;Actinobacteria;Coriobacteriia;Coriobacteriales;Coriobacteriaceae;Atopobium
OTU1129	0	0	19	0	0	Bacteria;Actinobacteria;Coriobacteriia;Coriobacteriales;Coriobacteriaceae;Atopobium
OTU0261	0	0	0	58	177	Bacteria;Actinobacteria;Coriobacteriia;Coriobacteriales;Coriobacteriaceae;Collinsella
OTU1116	0	0	0	21	0	Bacteria;Actinobacteria;Coriobacteriia;Coriobacteriales;Coriobacteriaceae;Collinsella
OTU0662	0	76	0	0	0	Bacteria;Actinobacteria;Coriobacteriia;Coriobacteriales;Coriobacteriaceae;Eggerthella
OTU1339	0	0	3	0	0	Bacteria;Actinobacteria;Coriobacteriia;Coriobacteriales;Coriobacteriaceae;Enterorhabdus
OTU0977	0	0	0	0	15	Bacteria;Actinobacteria;Coriobacteriia;Coriobacteriales;Coriobacteriaceae;Gordonibacter
OTU0338	0	0	0	0	118	Bacteria;Actinobacteria;Coriobacteriia;Coriobacteriales;Coriobacteriaceae;NA
OTU1124	0	0	0	0	20	Bacteria;Actinobacteria;Coriobacteriia;Coriobacteriales;Coriobacteriaceae;NA
OTU1297	0	0	0	0	8	Bacteria;Actinobacteria;Coriobacteriia;Coriobacteriales;Coriobacteriaceae;NA
OTU1299	0	0	0	0	8	Bacteria;Actinobacteria;Coriobacteriia;Coriobacteriales;Coriobacteriaceae;NA
OTU0901	0	0	0	41	0	Bacteria;Actinobacteria;Coriobacteriia;Coriobacteriales;Coriobacteriaceae;Olsenella
OTU1246	0	0	11	0	0	Bacteria;Actinobacteria;Thermoleophilia;Solirubrobacterales;Elev-16S-1332;NA
OTU0421	0	0	0	178	0	Bacteria;Actinobacteria;Thermoleophilia;Solirubrobacterales;Patulibacteraceae;Patulibacter
OTU0975	0	0	0	34	0	Bacteria;Actinobacteria;Thermoleophilia;Solirubrobacterales;Patulibacteraceae;Patulibacter
OTU0937	0	0	0	0	0	Bacteria;Actinobacteria;Thermoleophilia;Solirubrobacterales;Solirubrobacteraceae;Solirubrobacter
OTU0776	0	0	0	0	0	Bacteria;Actinobacteria;Thermoleophilia;Solirubrobacterales;TM146;NA
OTU0009	0	0	0	3787	0	Bacteria;Bacteroidetes;Bacteroidia;Bacteroidales;Bacteroidaceae;Bacteroides
OTU0039	0	1698	0	0	0	Bacteria;Bacteroidetes;Bacteroidia;Bacteroidales;Bacteroidaceae;Bacteroides
OTU0069	0	194	0	0	1050	Bacteria;Bacteroidetes;Bacteroidia;Bacteroidales;Bacteroidaceae;Bacteroides
OTU0075	0	0	0	474	0	Bacteria;Bacteroidetes;Bacteroidia;Bacteroidales;Bacteroidaceae;Bacteroides
OTU0086	0	180	0	0	641	Bacteria;Bacteroidetes;Bacteroidia;Bacteroidales;Bacteroidaceae;Bacteroides
OTU0105	0	0	0	0	713	Bacteria;Bacteroidetes;Bacteroidia;Bacteroidales;Bacteroidaceae;Bacteroides
OTU0166	0	0	0	0	391	Bacteria;Bacteroidetes;Bacteroidia;Bacteroidales;Bacteroidaceae;Bacteroides
OTU0185	0	0	0	0	323	Bacteria;Bacteroidetes;Bacteroidia;Bacteroidales;Bacteroidaceae;Bacteroides
OTU0115	0	264	0	0	50	Bacteria;Bacteroidetes;Bacteroidia;Bacteroidales;Bacteroidaceae;Bacteroides
OTU0192	0	0	0	0	312	Bacteria;Bacteroidetes;Bacteroidia;Bacteroidales;Bacteroidaceae;Bacteroides
OTU0362	0	0	0	224	0	Bacteria;Bacteroidetes;Bacteroidia;Bacteroidales;Bacteroidaceae;Bacteroides
OTU0259	0	0	0	0	223	Bacteria;Bacteroidetes;Bacteroidia;Bacteroidales;Bacteroidaceae;Bacteroides
OTU0256	0	0	0	0	208	Bacteria;Bacteroidetes;Bacteroidia;Bacteroidales;Bacteroidaceae;Bacteroides
OTU0396	0	0	0	198	0	Bacteria;Bacteroidetes;Bacteroidia;Bacteroidales;Bacteroidaceae;Bacteroides
OTU0404	0	0	0	192	0	Bacteria;Bacteroidetes;Bacteroidia;Bacteroidales;Bacteroidaceae;Bacteroides
OTU0390	0	0	0	0	123	Bacteria;Bacteroidetes;Bacteroidia;Bacteroidales;Bacteroidaceae;Bacteroides
OTU0550	0	0	0	106	0	Bacteria;Bacteroidetes;Bacteroidia;Bacteroidales;Bacteroidaceae;Bacteroides
OTU0391	0	0	0	0	102	Bacteria;Bacteroidetes;Bacteroidia;Bacteroidales;Bacteroidaceae;Bacteroides
OTU0378	0	0	0	0	101	Bacteria;Bacteroidetes;Bacteroidia;Bacteroidales;Bacteroidaceae;Bacteroides
OTU0467	0	0	0	0	78	Bacteria;Bacteroidetes;Bacteroidia;Bacteroidales;Bacteroidaceae;Bacteroides
OTU0786	52	0	0	0	0	Bacteria;Bacteroidetes;Bacteroidia;Bacteroidales;Bacteroidaceae;Bacteroides
OTU0591	0	0	0	0	50	Bacteria;Bacteroidetes;Bacteroidia;Bacteroidales;Bacteroidaceae;Bacteroides
OTU0444	0	0	0	0	43	Bacteria;Bacteroidetes;Bacteroidia;Bacteroidales;Bacteroidaceae;Bacteroides
OTU1112	0	0	0	0	22	Bacteria;Bacteroidetes;Bacteroidia;Bacteroidales;Bacteroidaceae;Bacteroides
OTU0068	0	0	0	0	1085	Bacteria;Bacteroidetes;Bacteroidia;Bacteroidales;Bacteroidales_S24-7_group;NA
OTU0176	0	0	0	0	330	Bacteria;Bacteroidetes;Bacteroidia;Bacteroidales;Bacteroidales_S24-7_group;NA
OTU0829	0	0	0	0	48	Bacteria;Bacteroidetes;Bacteroidia;Bacteroidales;Bacteroidales_S24-7_group;NA
OTU0494	0	0	0	0	77	Bacteria;Bacteroidetes;Bacteroidia;Bacteroidales;Porphyromonadaceae;Butyricimonas
OTU0830	0	0	0	0	48	Bacteria;Bacteroidetes;Bacteroidia;Bacteroidales;Porphyromonadaceae;Butyricimonas
OTU0785	52	0	0	0	0	Bacteria;Bacteroidetes;Bacteroidia;Bacteroidales;Porphyromonadaceae;Dysgonomonas
OTU0152	0	883	0	0	0	Bacteria;Bacteroidetes;Bacteroidia;Bacteroidales;Porphyromonadaceae;NA
OTU1335	0	0	0	0	4	Bacteria;Bacteroidetes;Bacteroidia;Bacteroidales;Porphyromonadaceae;NA
OTU0619	0	0	0	0	56	Bacteria;Bacteroidetes;Bacteroidia;Bacteroidales;Porphyromonadaceae;Odoribacter
OTU0143	0	0	0	0	546	Bacteria;Bacteroidetes;Bacteroidia;Bacteroidales;Porphyromonadaceae;Parabacteroides
OTU0400	0	0	0	0	105	Bacteria;Bacteroidetes;Bacteroidia;Bacteroidales;Porphyromonadaceae;Parabacteroides
OTU0598	0	0	0	0	50	Bacteria;Bacteroidetes;Bacteroidia;Bacteroidales;Porphyromonadaceae;Parabacteroides
OTU0718	0	0	0	0	34	Bacteria;Bacteroidetes;Bacteroidia;Bacteroidales;Porphyromonadaceae;Parabacteroides
OTU0056	916	0	4	0	0	Bacteria;Bacteroidetes;Bacteroidia;Bacteroidales;Porphyromonadaceae;Porphyromonas
OTU0098	0	603	0	0	0	Bacteria;Bacteroidetes;Bacteroidia;Bacteroidales;Prevotellaceae;Alloprevotella
OTU0157	0	496	0	0	0	Bacteria;Bacteroidetes;Bacteroidia;Bacteroidales;Prevotellaceae;Alloprevotella
OTU0173	0	198	0	0	0	Bacteria;Bacteroidetes;Bacteroidia;Bacteroidales;Prevotellaceae;Alloprevotella
OTU0642	0	0	0	0	0	Bacteria;Bacteroidetes;Bacteroidia;Bacteroidales;Prevotellaceae;Prevotella
OTU0892	0	0	0	42	0	Bacteria;Bacteroidetes;Bacteroidia;Bacteroidales;Prevotellaceae;Prevotella
OTU0893	0	0	0	42	0	Bacteria;Bacteroidetes;Bacteroidia;Bacteroidales;Prevotellaceae;Prevotella
OTU0966	34	0	0	0	0	Bacteria;Bacteroidetes;Bacteroidia;Bacteroidales;Prevotellaceae;Prevotella
OTU1195	0	0	14	0	0	Bacteria;Bacteroidetes;Bacteroidia;Bacteroidales;Prevotellaceae;Prevotella
OTU0310	0	0	0	36	0	Bacteria;Bacteroidetes;Bacteroidia;Bacteroidales;Prevotellaceae;Prevotella_2
OTU0838	0	0	0	0	0	Bacteria;Bacteroidetes;Bacteroidia;Bacteroidales;Prevotellaceae;Prevotella_7
OTU0970	0	0	34	0	0	Bacteria;Bacteroidetes;Bacteroidia;Bacteroidales;Prevotellaceae;Prevotella_7
OTU0222	0	0	0	0	259	Bacteria;Bacteroidetes;Bacteroidia;Bacteroidales;Rikenellaceae;Alistipes
OTU0305	0	0	0	0	153	Bacteria;Bacteroidetes;Bacteroidia;Bacteroidales;Rikenellaceae;Alistipes
OTU0335	0	0	0	0	143	Bacteria;Bacteroidetes;Bacteroidia;Bacteroidales;Rikenellaceae;Alistipes
OTU0455	0	0	0	0	107	Bacteria;Bacteroidetes;Bacteroidia;Bacteroidales;Rikenellaceae;Alistipes
OTU0512	0	0	0	0	86	Bacteria;Bacteroidetes;Bacteroidia;Bacteroidales;Rikenellaceae;Alistipes
OTU0309	0	0	0	0	73	Bacteria;Bacteroidetes;Bacteroidia;Bacteroidales;Rikenellaceae;Alistipes
OTU0633	0	0	0	0	42	Bacteria;Bacteroidetes;Bacteroidia;Bacteroidales;Rikenellaceae;Alistipes
OTU0270	339	0	0	0	0	Bacteria;Bacteroidetes;Cytophagia;Cytophagales;Cyclobacteriaceae;NA
OTU0896	0	0	41	0	0	Bacteria;Bacteroidetes;Cytophagia;Cytophagales;Cytophagaceae;Cytophaga
OTU0810	0	0	50	0	0	Bacteria;Bacteroidetes;Cytophagia;Cytophagales;Cytophagaceae;Dyadobacter
OTU0323	0	0	0	255	0	Bacteria;Bacteroidetes;Cytophagia;Cytophagales;Cytophagaceae;Hymenobacter
OTU0564	0	0	0	0	0	Bacteria;Bacteroidetes;Cytophagia;Cytophagales;Cytophagaceae;Hymenobacter
OTU0646	0	0	0	0	0	Bacteria;Bacteroidetes;Cytophagia;Cytophagales;Cytophagaceae;Hymenobacter
OTU0974	0	0	0	34	0	Bacteria;Bacteroidetes;Cytophagia;Cytophagales;Cytophagaceae;Hymenobacter
OTU0989	0	0	0	0	0	Bacteria;Bacteroidetes;Cytophagia;Cytophagales;Cytophagaceae;Hymenobacter
OTU0938	0	0	0	0	0	Bacteria;Bacteroidetes;Cytophagia;Cytophagales;Cytophagaceae;NA
OTU0981	0	0	33	0	0	Bacteria;Bacteroidetes;Cytophagia;Cytophagales;Cytophagaceae;Persicitalea
OTU0707	0	0	0	66	0	Bacteria;Bacteroidetes;Cytophagia;Cytophagales;Cytophagaceae;Spirosoma
OTU0258	0	0	0	0	0	Bacteria;Bacteroidetes;Flavobacteriia;Flavobacteriales;Flavobacteriaceae;Bergeyella
OTU0578	0	0	71	0	0	Bacteria;Bacteroidetes;Flavobacteriia;Flavobacteriales;Flavobacteriaceae;Bergeyella
OTU0739	0	0	0	0	0	Bacteria;Bacteroidetes;Flavobacteriia;Flavobacteriales;Flavobacteriaceae;Bergeyella
OTU0061	905	0	0	0	0	Bacteria;Bacteroidetes;Flavobacteriia;Flavobacteriales;Flavobacteriaceae;Capnocytophaga
OTU0122	460	0	0	0	0	Bacteria;Bacteroidetes;Flavobacteriia;Flavobacteriales;Flavobacteriaceae;Capnocytophaga
OTU0110	158	0	0	235	0	Bacteria;Bacteroidetes;Flavobacteriia;Flavobacteriales;Flavobacteriaceae;Capnocytophaga
OTU0273	330	0	0	0	0	Bacteria;Bacteroidetes;Flavobacteriia;Flavobacteriales;Flavobacteriaceae;Capnocytophaga
OTU0343	175	0	0	0	0	Bacteria;Bacteroidetes;Flavobacteriia;Flavobacteriales;Flavobacteriaceae;Capnocytophaga
OTU0664	0	0	0	0	0	Bacteria;Bacteroidetes;Flavobacteriia;Flavobacteriales;Flavobacteriaceae;Chryseobacterium
OTU0791	0	0	0	0	0	Bacteria;Bacteroidetes;Flavobacteriia;Flavobacteriales;Flavobacteriaceae;Chryseobacterium
OTU0042	0	345	0	0	0	Bacteria;Bacteroidetes;Flavobacteriia;Flavobacteriales;Flavobacteriaceae;Cloacibacterium
OTU0341	0	0	0	0	0	Bacteria;Bacteroidetes;Flavobacteriia;Flavobacteriales;Flavobacteriaceae;Cloacibacterium
OTU0561	0	0	0	0	0	Bacteria;Bacteroidetes;Flavobacteriia;Flavobacteriales;Flavobacteriaceae;Cloacibacterium
OTU0780	0	0	0	0	0	Bacteria;Bacteroidetes;Flavobacteriia;Flavobacteriales;Flavobacteriaceae;Cloacibacterium
OTU0699	67	0	0	0	0	Bacteria;Bacteroidetes;Flavobacteriia;Flavobacteriales;Flavobacteriaceae;Flavobacterium
OTU0762	56	0	0	0	0	Bacteria;Bacteroidetes;Flavobacteriia;Flavobacteriales;Flavobacteriaceae;Flavobacterium
OTU0887	0	42	0	0	0	Bacteria;Bacteroidetes;Flavobacteriia;Flavobacteriales;Flavobacteriaceae;Flavobacterium
OTU0936	0	0	0	0	0	Bacteria;Bacteroidetes;Flavobacteriia;Flavobacteriales;Flavobacteriaceae;Flavobacterium
OTU1001	0	0	32	0	0	Bacteria;Bacteroidetes;Flavobacteriia;Flavobacteriales;Flavobacteriaceae;Flavobacterium
OTU1056	0	0	27	0	0	Bacteria;Bacteroidetes;Flavobacteriia;Flavobacteriales;Flavobacteriaceae;Flavobacterium
OTU1159	0	0	17	0	0	Bacteria;Bacteroidetes;Flavobacteriia;Flavobacteriales;Flavobacteriaceae;Flavobacterium
OTU1088	0	0	16	0	0	Bacteria;Bacteroidetes;Flavobacteriia;Flavobacteriales;Flavobacteriaceae;Flavobacterium
OTU1086	0	0	25	0	0	Bacteria;Bacteroidetes;Flavobacteriia;Flavobacteriales;Flavobacteriaceae;Gillisia
OTU0999	0	32	0	0	0	Bacteria;Bacteroidetes;Flavobacteriia;Flavobacteriales;Flavobacteriaceae;Myroides
OTU0529	0	0	0	0	59	Bacteria;Bacteroidetes;Flavobacteriia;Flavobacteriales;NA;NA
OTU0254	0	0	0	393	0	Bacteria;Bacteroidetes;Flavobacteriia;Flavobacteriales;NS9_marine_group;NA
OTU0519	0	0	0	120	0	Bacteria;Bacteroidetes;Flavobacteriia;Flavobacteriales;NS9_marine_group;NA
OTU1134	0	0	0	0	0	Bacteria;Bacteroidetes;NA;NA;NA;NA
OTU1023	0	0	30	0	0	Bacteria;Bacteroidetes;Sphingobacteriia;Sphingobacteriales;Chitinophagaceae;Ferruginibacter
OTU1180	0	0	15	0	0	Bacteria;Bacteroidetes;Sphingobacteriia;Sphingobacteriales;Chitinophagaceae;Ferruginibacter
OTU0728	0	0	26	0	0	Bacteria;Bacteroidetes;Sphingobacteriia;Sphingobacteriales;Chitinophagaceae;Hydrotalea
OTU0948	0	0	36	0	0	Bacteria;Bacteroidetes;Sphingobacteriia;Sphingobacteriales;Chitinophagaceae;NA
OTU1204	0	0	0	0	0	Bacteria;Bacteroidetes;Sphingobacteriia;Sphingobacteriales;Chitinophagaceae;NA
OTU1262	0	0	10	0	0	Bacteria;Bacteroidetes;Sphingobacteriia;Sphingobacteriales;env.OPS_17;NA
OTU0679	0	0	0	0	0	Bacteria;Bacteroidetes;Sphingobacteriia;Sphingobacteriales;Saprospiraceae;NA
OTU0711	0	0	0	0	0	Bacteria;Bacteroidetes;Sphingobacteriia;Sphingobacteriales;Saprospiraceae;NA
OTU0958	0	0	35	0	0	Bacteria;Bacteroidetes;Sphingobacteriia;Sphingobacteriales;Saprospiraceae;NA
OTU1128	0	0	19	0	0	Bacteria;Bacteroidetes;Sphingobacteriia;Sphingobacteriales;Sphingobacteriaceae;NA
OTU0600	0	0	0	0	0	Bacteria;Bacteroidetes;Sphingobacteriia;Sphingobacteriales;Sphingobacteriaceae;Pedobacter
OTU0837	0	0	0	0	0	Bacteria;Bacteroidetes;Sphingobacteriia;Sphingobacteriales;Sphingobacteriaceae;Pedobacter
OTU0850	0	0	0	0	0	Bacteria;Bacteroidetes;Sphingobacteriia;Sphingobacteriales;Sphingobacteriaceae;Pedobacter
OTU1181	0	0	15	0	0	Bacteria;Bacteroidetes;Sphingobacteriia;Sphingobacteriales;Sphingobacteriaceae;Pedobacter
OTU1054	0	0	27	0	0	Bacteria;Chlamydiae;Chlamydiae;Chlamydiales;Simkaniaceae;NA
OTU1331	0	0	4	0	0	Bacteria;Chloroflexi;Anaerolineae;Anaerolineales;Anaerolineaceae;NA
OTU1017	0	0	31	0	0	Bacteria;Chloroflexi;Thermomicrobia;JG30-KF-CM45;NA;NA
OTU1291	0	0	0	0	0	Bacteria;Cyanobacteria;Cyanobacteria;SubsectionII;FamilyII;Chroococcidiopsis
OTU1327	0	0	0	0	0	Bacteria;Cyanobacteria;Cyanobacteria;SubsectionIII;FamilyI;Microcoleus
OTU1089	0	0	0	0	0	Bacteria;Cyanobacteria;Cyanobacteria;SubsectionIV;FamilyI;NA
OTU0385	0	0	0	0	93	Bacteria;Cyanobacteria;Melainabacteria;Gastranaerophilales;NA;NA
OTU1046	0	0	28	0	0	Bacteria;Cyanobacteria;ML635J-21;NA;NA;NA
OTU1227	0	0	12	0	0	Bacteria;Cyanobacteria;ML635J-21;NA;NA;NA
OTU1133	0	0	0	0	0	Bacteria;Deinococcus-Thermus;Deinococci;Deinococcales;Deinococcaceae;Deinococcus
OTU0024	1790	62	27	1276	0	Bacteria;Firmicutes;Bacilli;Bacillales;Family_XI;Gemella
OTU1326	0	0	0	0	0	Bacteria;Firmicutes;Bacilli;Bacillales;Planococcaceae;NA
OTU0750	0	0	0	0	0	Bacteria;Firmicutes;Bacilli;Bacillales;Planococcaceae;Planococcus
OTU0897	0	0	0	0	0	Bacteria;Firmicutes;Bacilli;Bacillales;Staphylococcaceae;Macrococcus
OTU0007	0	0	7994	1296	0	Bacteria;Firmicutes;Bacilli;Bacillales;Staphylococcaceae;Staphylococcus
OTU0264	0	0	0	353	0	Bacteria;Firmicutes;Bacilli;Bacillales;Staphylococcaceae;Staphylococcus
OTU0299	0	0	0	229	0	Bacteria;Firmicutes;Bacilli;Bacillales;Staphylococcaceae;Staphylococcus
OTU0219	0	0	260	0	0	Bacteria;Firmicutes;Bacilli;Bacillales;Staphylococcaceae;Staphylococcus
OTU0547	0	0	0	107	0	Bacteria;Firmicutes;Bacilli;Bacillales;Staphylococcaceae;Staphylococcus
OTU0924	0	0	0	0	0	Bacteria;Firmicutes;Bacilli;Bacillales;Thermoactinomycetaceae;Planifilum
OTU0124	598	0	0	0	0	Bacteria;Firmicutes;Bacilli;Lactobacillales;Aerococcaceae;Abiotrophia
OTU0274	199	0	0	0	0	Bacteria;Firmicutes;Bacilli;Lactobacillales;Aerococcaceae;Abiotrophia
OTU0792	0	0	0	0	0	Bacteria;Firmicutes;Bacilli;Lactobacillales;Aerococcaceae;Facklamia
OTU0163	0	0	0	200	0	Bacteria;Firmicutes;Bacilli;Lactobacillales;Carnobacteriaceae;Alkalibacterium
OTU0234	0	0	0	289	0	Bacteria;Firmicutes;Bacilli;Lactobacillales;Carnobacteriaceae;Alkalibacterium
OTU0587	0	0	0	0	0	Bacteria;Firmicutes;Bacilli;Lactobacillales;Carnobacteriaceae;Alkalibacterium
OTU0931	0	0	0	38	0	Bacteria;Firmicutes;Bacilli;Lactobacillales;Carnobacteriaceae;Alkalibacterium
OTU0932	0	0	0	38	0	Bacteria;Firmicutes;Bacilli;Lactobacillales;Carnobacteriaceae;Alkalibacterium
OTU0126	0	0	595	0	0	Bacteria;Firmicutes;Bacilli;Lactobacillales;Carnobacteriaceae;Dolosigranulum
OTU0053	777	0	0	0	0	Bacteria;Firmicutes;Bacilli;Lactobacillales;Carnobacteriaceae;Granulicatella
OTU0454	0	0	0	153	0	Bacteria;Firmicutes;Bacilli;Lactobacillales;Carnobacteriaceae;Granulicatella
OTU0800	0	0	0	0	0	Bacteria;Firmicutes;Bacilli;Lactobacillales;Carnobacteriaceae;Marinilactibacillus
OTU0109	134	0	0	0	355	Bacteria;Firmicutes;Bacilli;Lactobacillales;Enterococcaceae;Enterococcus
OTU0145	233	0	0	0	0	Bacteria;Firmicutes;Bacilli;Lactobacillales;Enterococcaceae;Enterococcus
OTU1050	0	0	0	0	0	Bacteria;Firmicutes;Bacilli;Lactobacillales;Enterococcaceae;Enterococcus
OTU0092	0	0	0	0	0	Bacteria;Firmicutes;Bacilli;Lactobacillales;Lactobacillaceae;Lactobacillus
OTU0083	0	0	0	0	0	Bacteria;Firmicutes;Bacilli;Lactobacillales;Lactobacillaceae;Lactobacillus
OTU0320	0	0	0	258	0	Bacteria;Firmicutes;Bacilli;Lactobacillales;Lactobacillaceae;Lactobacillus
OTU0537	0	0	13	0	0	Bacteria;Firmicutes;Bacilli;Lactobacillales;Lactobacillaceae;Lactobacillus
OTU1087	0	0	25	0	0	Bacteria;Firmicutes;Bacilli;Lactobacillales;Lactobacillaceae;Lactobacillus
OTU1024	0	0	30	0	0	Bacteria;Firmicutes;Bacilli;Lactobacillales;Leuconostocaceae;Leuconostoc
OTU0123	0	0	424	283	0	Bacteria;Firmicutes;Bacilli;Lactobacillales;Streptococcaceae;Lactococcus
OTU0848	0	0	46	0	0	Bacteria;Firmicutes;Bacilli;Lactobacillales;Streptococcaceae;Lactococcus
OTU0006	8743	0	179	2491	0	Bacteria;Firmicutes;Bacilli;Lactobacillales;Streptococcaceae;Streptococcus
OTU0015	3478	0	0	615	0	Bacteria;Firmicutes;Bacilli;Lactobacillales;Streptococcaceae;Streptococcus
OTU0120	736	0	0	0	0	Bacteria;Firmicutes;Bacilli;Lactobacillales;Streptococcaceae;Streptococcus
OTU0292	0	302	0	0	0	Bacteria;Firmicutes;Bacilli;Lactobacillales;Streptococcaceae;Streptococcus
OTU0100	71	0	0	0	46	Bacteria;Firmicutes;Bacilli;Lactobacillales;Streptococcaceae;Streptococcus
OTU0476	141	0	0	0	0	Bacteria;Firmicutes;Bacilli;Lactobacillales;Streptococcaceae;Streptococcus
OTU0477	0	0	0	141	0	Bacteria;Firmicutes;Bacilli;Lactobacillales;Streptococcaceae;Streptococcus
OTU0545	107	0	0	0	0	Bacteria;Firmicutes;Bacilli;Lactobacillales;Streptococcaceae;Streptococcus
OTU0616	0	0	0	88	0	Bacteria;Firmicutes;Bacilli;Lactobacillales;Streptococcaceae;Streptococcus
OTU0643	0	0	0	82	0	Bacteria;Firmicutes;Bacilli;Lactobacillales;Streptococcaceae;Streptococcus
OTU0668	0	0	0	75	0	Bacteria;Firmicutes;Bacilli;Lactobacillales;Streptococcaceae;Streptococcus
OTU0898	0	0	0	0	0	Bacteria;Firmicutes;Bacilli;Lactobacillales;Streptococcaceae;Streptococcus
OTU0181	0	0	0	0	0	Bacteria;Firmicutes;Bacilli;Lactobacillales;Streptococcaceae;Streptococcus
OTU0933	0	0	0	38	0	Bacteria;Firmicutes;Bacilli;Lactobacillales;Streptococcaceae;Streptococcus
OTU0342	0	0	0	0	117	Bacteria;Firmicutes;Clostridia;Clostridiales;Christensenellaceae;Christensenellaceae_R-7_group
OTU0736	0	0	0	0	34	Bacteria;Firmicutes;Clostridia;Clostridiales;Christensenellaceae;Christensenellaceae_R-7_group
OTU1154	0	0	0	0	18	Bacteria;Firmicutes;Clostridia;Clostridiales;Christensenellaceae;Christensenellaceae_R-7_group
OTU1155	0	0	0	0	18	Bacteria;Firmicutes;Clostridia;Clostridiales;Christensenellaceae;Christensenellaceae_R-7_group
OTU0957	0	0	0	6	0	Bacteria;Firmicutes;Clostridia;Clostridiales;Christensenellaceae;Christensenellaceae_R-7_group
OTU1223	0	0	0	0	13	Bacteria;Firmicutes;Clostridia;Clostridiales;Christensenellaceae;NA
OTU1296	0	0	0	0	8	Bacteria;Firmicutes;Clostridia;Clostridiales;Christensenellaceae;NA
OTU1045	0	0	28	0	0	Bacteria;Firmicutes;Clostridia;Clostridiales;Clostridiaceae_1;Clostridium_sensu_stricto_1
OTU0595	0	0	0	0	0	Bacteria;Firmicutes;Clostridia;Clostridiales;Clostridiaceae_1;Clostridium_sensu_stricto_5
OTU0260	0	0	0	0	175	Bacteria;Firmicutes;Clostridia;Clostridiales;Clostridiales_vadinBB60_group;NA
OTU0997	0	0	0	0	17	Bacteria;Firmicutes;Clostridia;Clostridiales;Clostridiales_vadinBB60_group;NA
OTU1187	0	0	0	0	15	Bacteria;Firmicutes;Clostridia;Clostridiales;Clostridiales_vadinBB60_group;NA
OTU0187	0	0	299	0	0	Bacteria;Firmicutes;Clostridia;Clostridiales;Family_XI;Anaerococcus
OTU0314	0	0	42	0	0	Bacteria;Firmicutes;Clostridia;Clostridiales;Family_XI;Anaerococcus
OTU0613	0	0	0	0	0	Bacteria;Firmicutes;Clostridia;Clostridiales;Family_XI;Anaerococcus
OTU0659	0	0	0	0	0	Bacteria;Firmicutes;Clostridia;Clostridiales;Family_XI;Anaerococcus
OTU0891	0	0	0	0	0	Bacteria;Firmicutes;Clostridia;Clostridiales;Family_XI;Anaerococcus
OTU1055	0	0	27	0	0	Bacteria;Firmicutes;Clostridia;Clostridiales;Family_XI;Anaerococcus
OTU0085	275	0	205	0	0	Bacteria;Firmicutes;Clostridia;Clostridiales;Family_XI;Finegoldia
OTU0165	0	238	0	0	0	Bacteria;Firmicutes;Clostridia;Clostridiales;Family_XI;Parvimonas
OTU0051	0	0	1385	207	0	Bacteria;Firmicutes;Clostridia;Clostridiales;Family_XI;Peptoniphilus
OTU0647	0	0	0	0	0	Bacteria;Firmicutes;Clostridia;Clostridiales;Family_XI;Peptoniphilus
OTU0831	0	0	0	0	25	Bacteria;Firmicutes;Clostridia;Clostridiales;Family_XIII;Family_XIII_AD3011_group
OTU1033	0	0	0	0	20	Bacteria;Firmicutes;Clostridia;Clostridiales;Family_XIII;Family_XIII_AD3011_group
OTU1153	0	0	0	0	18	Bacteria;Firmicutes;Clostridia;Clostridiales;Family_XIII;Family_XIII_AD3011_group
OTU1221	0	0	0	0	13	Bacteria;Firmicutes;Clostridia;Clostridiales;Family_XIII;Family_XIII_AD3011_group
OTU1298	0	0	0	0	8	Bacteria;Firmicutes;Clostridia;Clostridiales;Family_XIII;Family_XIII_AD3011_group
OTU0501	0	0	0	0	61	Bacteria;Firmicutes;Clostridia;Clostridiales;Family_XIII;Family_XIII_UCG-001
OTU0121	0	0	0	0	608	Bacteria;Firmicutes;Clostridia;Clostridiales;Lachnospiraceae;Anaerostipes
OTU0230	0	0	0	0	256	Bacteria;Firmicutes;Clostridia;Clostridiales;Lachnospiraceae;Anaerostipes
OTU0151	0	0	0	0	460	Bacteria;Firmicutes;Clostridia;Clostridiales;Lachnospiraceae;Blautia
OTU0313	0	0	0	0	147	Bacteria;Firmicutes;Clostridia;Clostridiales;Lachnospiraceae;Blautia
OTU0308	0	0	0	0	130	Bacteria;Firmicutes;Clostridia;Clostridiales;Lachnospiraceae;Blautia
OTU0437	0	0	0	0	85	Bacteria;Firmicutes;Clostridia;Clostridiales;Lachnospiraceae;Blautia
OTU0461	0	0	0	0	61	Bacteria;Firmicutes;Clostridia;Clostridiales;Lachnospiraceae;Blautia
OTU0428	0	0	0	0	59	Bacteria;Firmicutes;Clostridia;Clostridiales;Lachnospiraceae;Blautia
OTU0392	0	0	0	0	102	Bacteria;Firmicutes;Clostridia;Clostridiales;Lachnospiraceae;Coprococcus_1
OTU0279	0	0	0	0	187	Bacteria;Firmicutes;Clostridia;Clostridiales;Lachnospiraceae;Coprococcus_3
OTU0375	0	0	0	0	107	Bacteria;Firmicutes;Clostridia;Clostridiales;Lachnospiraceae;Dorea
OTU0621	0	0	0	0	39	Bacteria;Firmicutes;Clostridia;Clostridiales;Lachnospiraceae;Dorea
OTU0210	0	0	0	0	266	Bacteria;Firmicutes;Clostridia;Clostridiales;Lachnospiraceae;Fusicatenibacter
OTU0500	0	0	0	0	64	Bacteria;Firmicutes;Clostridia;Clostridiales;Lachnospiraceae;Fusicatenibacter
OTU0403	0	194	0	0	0	Bacteria;Firmicutes;Clostridia;Clostridiales;Lachnospiraceae;Hungatella
OTU0755	57	0	0	0	0	Bacteria;Firmicutes;Clostridia;Clostridiales;Lachnospiraceae;Johnsonella
OTU0088	770	0	0	0	0	Bacteria;Firmicutes;Clostridia;Clostridiales;Lachnospiraceae;Lachnoanaerobaculum
OTU0346	150	0	0	0	0	Bacteria;Firmicutes;Clostridia;Clostridiales;Lachnospiraceae;Lachnoanaerobaculum
OTU0485	0	135	0	0	0	Bacteria;Firmicutes;Clostridia;Clostridiales;Lachnospiraceae;Lachnoclostridium
OTU1310	0	0	0	0	7	Bacteria;Firmicutes;Clostridia;Clostridiales;Lachnospiraceae;Lachnoclostridium
OTU0113	0	0	0	0	641	Bacteria;Firmicutes;Clostridia;Clostridiales;Lachnospiraceae;Lachnospira
OTU0285	0	0	0	0	182	Bacteria;Firmicutes;Clostridia;Clostridiales;Lachnospiraceae;Lachnospira
OTU0602	0	0	0	0	49	Bacteria;Firmicutes;Clostridia;Clostridiales;Lachnospiraceae;Lachnospiraceae_FCS020_group
OTU0352	0	0	0	0	121	Bacteria;Firmicutes;Clostridia;Clostridiales;Lachnospiraceae;Lachnospiraceae_ND3007_group
OTU0180	0	0	0	0	338	Bacteria;Firmicutes;Clostridia;Clostridiales;Lachnospiraceae;Lachnospiraceae_NK4A136_group
OTU0528	0	0	0	0	70	Bacteria;Firmicutes;Clostridia;Clostridiales;Lachnospiraceae;Lachnospiraceae_NK4A136_group
OTU0996	0	0	0	0	18	Bacteria;Firmicutes;Clostridia;Clostridiales;Lachnospiraceae;Lachnospiraceae_NK4B4_group
OTU0328	0	0	0	0	136	Bacteria;Firmicutes;Clostridia;Clostridiales;Lachnospiraceae;Lachnospiraceae_UCG-001
OTU0366	0	0	0	0	121	Bacteria;Firmicutes;Clostridia;Clostridiales;Lachnospiraceae;Marvinbryantia
OTU0356	0	0	0	0	99	Bacteria;Firmicutes;Clostridia;Clostridiales;Lachnospiraceae;Marvinbryantia
OTU1125	0	0	0	0	20	Bacteria;Firmicutes;Clostridia;Clostridiales;Lachnospiraceae;Marvinbryantia
OTU0326	0	0	0	254	0	Bacteria;Firmicutes;Clostridia;Clostridiales;Lachnospiraceae;Moryella
OTU0038	0	0	0	0	2133	Bacteria;Firmicutes;Clostridia;Clostridiales;Lachnospiraceae;NA
OTU0327	0	0	0	0	130	Bacteria;Firmicutes;Clostridia;Clostridiales;Lachnospiraceae;NA
OTU0364	0	0	0	0	123	Bacteria;Firmicutes;Clostridia;Clostridiales;Lachnospiraceae;NA
OTU0401	0	0	0	0	94	Bacteria;Firmicutes;Clostridia;Clostridiales;Lachnospiraceae;NA
OTU0435	0	0	0	0	83	Bacteria;Firmicutes;Clostridia;Clostridiales;Lachnospiraceae;NA
OTU0517	0	0	0	0	71	Bacteria;Firmicutes;Clostridia;Clostridiales;Lachnospiraceae;NA
OTU0471	0	0	0	0	64	Bacteria;Firmicutes;Clostridia;Clostridiales;Lachnospiraceae;NA
OTU0592	0	0	0	0	48	Bacteria;Firmicutes;Clostridia;Clostridiales;Lachnospiraceae;NA
OTU0861	0	0	0	0	45	Bacteria;Firmicutes;Clostridia;Clostridiales;Lachnospiraceae;NA
OTU0670	0	0	0	0	40	Bacteria;Firmicutes;Clostridia;Clostridiales;Lachnospiraceae;NA
OTU0678	0	0	0	0	35	Bacteria;Firmicutes;Clostridia;Clostridiales;Lachnospiraceae;NA
OTU1011	0	0	0	0	32	Bacteria;Firmicutes;Clostridia;Clostridiales;Lachnospiraceae;NA
OTU0817	0	0	0	0	25	Bacteria;Firmicutes;Clostridia;Clostridiales;Lachnospiraceae;NA
OTU1137	0	0	0	0	19	Bacteria;Firmicutes;Clostridia;Clostridiales;Lachnospiraceae;NA
OTU1138	0	0	0	0	19	Bacteria;Firmicutes;Clostridia;Clostridiales;Lachnospiraceae;NA
OTU1190	0	0	0	0	15	Bacteria;Firmicutes;Clostridia;Clostridiales;Lachnospiraceae;NA
OTU1209	0	0	0	0	14	Bacteria;Firmicutes;Clostridia;Clostridiales;Lachnospiraceae;NA
OTU0059	0	0	0	0	1414	Bacteria;Firmicutes;Clostridia;Clostridiales;Lachnospiraceae;Roseburia
OTU0209	0	0	0	0	251	Bacteria;Firmicutes;Clostridia;Clostridiales;Lachnospiraceae;Roseburia
OTU0337	0	0	0	0	126	Bacteria;Firmicutes;Clostridia;Clostridiales;Lachnospiraceae;Roseburia
OTU0695	0	0	0	0	69	Bacteria;Firmicutes;Clostridia;Clostridiales;Lachnospiraceae;Roseburia
OTU0601	0	0	0	0	54	Bacteria;Firmicutes;Clostridia;Clostridiales;Lachnospiraceae;Roseburia
OTU1238	0	0	0	0	12	Bacteria;Firmicutes;Clostridia;Clostridiales;Lachnospiraceae;Sellimonas
OTU1222	0	0	0	0	13	Bacteria;Firmicutes;Clostridia;Clostridiales;Lachnospiraceae;Tyzzerella
OTU0298	0	0	0	0	181	Bacteria;Firmicutes;Clostridia;Clostridiales;NA;NA
OTU0289	0	0	0	0	141	Bacteria;Firmicutes;Clostridia;Clostridiales;NA;NA
OTU1188	0	0	0	0	15	Bacteria;Firmicutes;Clostridia;Clostridiales;NA;NA
OTU1277	0	0	0	0	9	Bacteria;Firmicutes;Clostridia;Clostridiales;NA;NA
OTU1013	0	0	0	0	32	Bacteria;Firmicutes;Clostridia;Clostridiales;Peptococcaceae;NA
OTU1276	0	0	0	0	9	Bacteria;Firmicutes;Clostridia;Clostridiales;Peptococcaceae;NA
OTU1279	0	0	0	0	9	Bacteria;Firmicutes;Clostridia;Clostridiales;Peptococcaceae;NA
OTU0131	0	725	0	0	0	Bacteria;Firmicutes;Clostridia;Clostridiales;Peptostreptococcaceae;Filifactor
OTU0275	220	0	0	0	0	Bacteria;Firmicutes;Clostridia;Clostridiales;Peptostreptococcaceae;NA
OTU0148	0	563	0	0	0	Bacteria;Firmicutes;Clostridia;Clostridiales;Peptostreptococcaceae;Peptostreptococcus
OTU0775	0	0	0	0	47	Bacteria;Firmicutes;Clostridia;Clostridiales;Ruminococcaceae;Anaerotruncus
OTU1268	0	0	0	0	10	Bacteria;Firmicutes;Clostridia;Clostridiales;Ruminococcaceae;Anaerotruncus
OTU0563	0	0	0	0	44	Bacteria;Firmicutes;Clostridia;Clostridiales;Ruminococcaceae;Butyricicoccus
OTU0726	0	0	0	0	25	Bacteria;Firmicutes;Clostridia;Clostridiales;Ruminococcaceae;Butyricicoccus
OTU0118	0	0	0	0	579	Bacteria;Firmicutes;Clostridia;Clostridiales;Ruminococcaceae;Caproiciproducens
OTU1309	0	0	0	0	7	Bacteria;Firmicutes;Clostridia;Clostridiales;Ruminococcaceae;Caproiciproducens
OTU0686	0	0	0	0	0	Bacteria;Firmicutes;Clostridia;Clostridiales;Ruminococcaceae;Ethanoligenens
OTU0043	0	0	0	0	1917	Bacteria;Firmicutes;Clostridia;Clostridiales;Ruminococcaceae;Faecalibacterium
OTU0125	0	577	0	0	179	Bacteria;Firmicutes;Clostridia;Clostridiales;Ruminococcaceae;Faecalibacterium
OTU0139	0	0	0	0	541	Bacteria;Firmicutes;Clostridia;Clostridiales;Ruminococcaceae;Faecalibacterium
OTU0199	0	0	0	0	296	Bacteria;Firmicutes;Clostridia;Clostridiales;Ruminococcaceae;Faecalibacterium
OTU0414	0	0	0	0	85	Bacteria;Firmicutes;Clostridia;Clostridiales;Ruminococcaceae;Faecalibacterium
OTU1254	0	0	0	0	11	Bacteria;Firmicutes;Clostridia;Clostridiales;Ruminococcaceae;Flavonifractor
OTU0902	0	0	0	0	41	Bacteria;Firmicutes;Clostridia;Clostridiales;Ruminococcaceae;Intestinimonas
OTU0318	0	0	0	0	125	Bacteria;Firmicutes;Clostridia;Clostridiales;Ruminococcaceae;NA
OTU0372	0	0	0	0	100	Bacteria;Firmicutes;Clostridia;Clostridiales;Ruminococcaceae;NA
OTU0548	0	0	0	0	58	Bacteria;Firmicutes;Clostridia;Clostridiales;Ruminococcaceae;NA
OTU1099	0	0	0	0	24	Bacteria;Firmicutes;Clostridia;Clostridiales;Ruminococcaceae;NA
OTU1189	0	0	0	0	15	Bacteria;Firmicutes;Clostridia;Clostridiales;Ruminococcaceae;NA
OTU1191	0	0	0	0	15	Bacteria;Firmicutes;Clostridia;Clostridiales;Ruminococcaceae;NA
OTU1210	0	0	0	0	14	Bacteria;Firmicutes;Clostridia;Clostridiales;Ruminococcaceae;NA
OTU1278	0	0	0	0	9	Bacteria;Firmicutes;Clostridia;Clostridiales;Ruminococcaceae;NA
OTU1091	0	0	0	0	25	Bacteria;Firmicutes;Clostridia;Clostridiales;Ruminococcaceae;Oscillibacter
OTU1208	0	0	0	0	14	Bacteria;Firmicutes;Clostridia;Clostridiales;Ruminococcaceae;Ruminiclostridium
OTU0703	0	0	0	0	47	Bacteria;Firmicutes;Clostridia;Clostridiales;Ruminococcaceae;Ruminiclostridium_5
OTU0620	0	0	0	0	45	Bacteria;Firmicutes;Clostridia;Clostridiales;Ruminococcaceae;Ruminiclostridium_5
OTU0081	0	0	0	0	886	Bacteria;Firmicutes;Clostridia;Clostridiales;Ruminococcaceae;Ruminiclostridium_6
OTU0593	0	0	0	0	41	Bacteria;Firmicutes;Clostridia;Clostridiales;Ruminococcaceae;Ruminiclostridium_9
OTU0934	0	0	0	0	38	Bacteria;Firmicutes;Clostridia;Clostridiales;Ruminococcaceae;Ruminiclostridium_9
OTU0456	0	0	0	0	79	Bacteria;Firmicutes;Clostridia;Clostridiales;Ruminococcaceae;Ruminococcaceae_NK4A214_group
OTU0480	0	0	0	0	63	Bacteria;Firmicutes;Clostridia;Clostridiales;Ruminococcaceae;Ruminococcaceae_NK4A214_group
OTU0513	0	0	0	0	45	Bacteria;Firmicutes;Clostridia;Clostridiales;Ruminococcaceae;Ruminococcaceae_NK4A214_group
OTU0676	0	0	0	0	37	Bacteria;Firmicutes;Clostridia;Clostridiales;Ruminococcaceae;Ruminococcaceae_NK4A214_group
OTU1139	0	0	0	0	19	Bacteria;Firmicutes;Clostridia;Clostridiales;Ruminococcaceae;Ruminococcaceae_NK4A214_group
OTU0197	0	0	0	0	298	Bacteria;Firmicutes;Clostridia;Clostridiales;Ruminococcaceae;Ruminococcaceae_UCG-002
OTU0297	0	0	0	11	158	Bacteria;Firmicutes;Clostridia;Clostridiales;Ruminococcaceae;Ruminococcaceae_UCG-002
OTU0433	0	0	0	0	75	Bacteria;Firmicutes;Clostridia;Clostridiales;Ruminococcaceae;Ruminococcaceae_UCG-002
OTU0518	0	0	0	0	57	Bacteria;Firmicutes;Clostridia;Clostridiales;Ruminococcaceae;Ruminococcaceae_UCG-002
OTU0995	0	0	0	0	33	Bacteria;Firmicutes;Clostridia;Clostridiales;Ruminococcaceae;Ruminococcaceae_UCG-002
OTU1177	0	0	0	0	16	Bacteria;Firmicutes;Clostridia;Clostridiales;Ruminococcaceae;Ruminococcaceae_UCG-003
OTU0194	0	0	0	0	304	Bacteria;Firmicutes;Clostridia;Clostridiales;Ruminococcaceae;Ruminococcaceae_UCG-005
OTU0458	0	134	0	0	0	Bacteria;Firmicutes;Clostridia;Clostridiales;Ruminococcaceae;Ruminococcaceae_UCG-005
OTU0745	0	0	0	0	59	Bacteria;Firmicutes;Clostridia;Clostridiales;Ruminococcaceae;Ruminococcaceae_UCG-005
OTU0784	0	0	0	0	53	Bacteria;Firmicutes;Clostridia;Clostridiales;Ruminococcaceae;Ruminococcaceae_UCG-005
OTU0956	0	0	0	0	36	Bacteria;Firmicutes;Clostridia;Clostridiales;Ruminococcaceae;Ruminococcaceae_UCG-005
OTU0725	0	0	0	0	32	Bacteria;Firmicutes;Clostridia;Clostridiales;Ruminococcaceae;Ruminococcaceae_UCG-007
OTU0680	0	0	0	0	35	Bacteria;Firmicutes;Clostridia;Clostridiales;Ruminococcaceae;Ruminococcaceae_UCG-010
OTU0671	0	0	0	0	34	Bacteria;Firmicutes;Clostridia;Clostridiales;Ruminococcaceae;Ruminococcaceae_UCG-010
OTU1211	0	0	0	0	14	Bacteria;Firmicutes;Clostridia;Clostridiales;Ruminococcaceae;Ruminococcaceae_UCG-010
OTU1239	0	0	0	0	12	Bacteria;Firmicutes;Clostridia;Clostridiales;Ruminococcaceae;Ruminococcaceae_UCG-010
OTU1253	0	0	0	0	11	Bacteria;Firmicutes;Clostridia;Clostridiales;Ruminococcaceae;Ruminococcaceae_UCG-010
OTU1275	0	0	0	0	9	Bacteria;Firmicutes;Clostridia;Clostridiales;Ruminococcaceae;Ruminococcaceae_UCG-010
OTU0344	0	0	0	0	116	Bacteria;Firmicutes;Clostridia;Clostridiales;Ruminococcaceae;Ruminococcaceae_UCG-013
OTU0965	0	0	0	0	35	Bacteria;Firmicutes;Clostridia;Clostridiales;Ruminococcaceae;Ruminococcaceae_UCG-013
OTU0288	0	0	0	0	185	Bacteria;Firmicutes;Clostridia;Clostridiales;Ruminococcaceae;Ruminococcaceae_UCG-014
OTU0387	0	0	0	0	100	Bacteria;Firmicutes;Clostridia;Clostridiales;Ruminococcaceae;Ruminococcaceae_UCG-014
OTU0484	0	0	0	0	81	Bacteria;Firmicutes;Clostridia;Clostridiales;Ruminococcaceae;Ruminococcaceae_UCG-014
OTU0538	0	0	0	0	68	Bacteria;Firmicutes;Clostridia;Clostridiales;Ruminococcaceae;Ruminococcaceae_UCG-014
OTU0507	0	0	0	0	64	Bacteria;Firmicutes;Clostridia;Clostridiales;Ruminococcaceae;Ruminococcaceae_UCG-014
OTU0530	0	0	0	0	58	Bacteria;Firmicutes;Clostridia;Clostridiales;Ruminococcaceae;Ruminococcaceae_UCG-014
OTU0117	0	0	0	0	625	Bacteria;Firmicutes;Clostridia;Clostridiales;Ruminococcaceae;Ruminococcus_1
OTU0245	0	0	0	0	204	Bacteria;Firmicutes;Clostridia;Clostridiales;Ruminococcaceae;Ruminococcus_1
OTU0542	0	0	0	0	51	Bacteria;Firmicutes;Clostridia;Clostridiales;Ruminococcaceae;Ruminococcus_1
OTU0054	0	0	0	0	1523	Bacteria;Firmicutes;Clostridia;Clostridiales;Ruminococcaceae;Subdoligranulum
OTU0162	0	0	0	0	337	Bacteria;Firmicutes;Clostridia;Clostridiales;Ruminococcaceae;Subdoligranulum
OTU0218	0	0	0	0	239	Bacteria;Firmicutes;Clostridia;Clostridiales;Ruminococcaceae;Subdoligranulum
OTU0251	0	0	0	0	202	Bacteria;Firmicutes;Clostridia;Clostridiales;Ruminococcaceae;Subdoligranulum
OTU0801	0	0	0	0	0	Bacteria;Firmicutes;Clostridia;Halanaerobiales;ODP1230B8.23;NA
OTU0559	0	0	0	0	57	Bacteria;Firmicutes;Clostridia;NA;NA;NA
OTU1186	0	0	0	0	15	Bacteria;Firmicutes;Clostridia;NA;NA;NA
OTU0067	0	0	0	0	1027	Bacteria;Firmicutes;Erysipelotrichia;Erysipelotrichales;Erysipelotrichaceae;Erysipelotrichaceae_UCG-003
OTU1067	0	0	0	0	18	Bacteria;Firmicutes;Erysipelotrichia;Erysipelotrichales;Erysipelotrichaceae;Holdemania
OTU0555	0	0	0	0	56	Bacteria;Firmicutes;Erysipelotrichia;Erysipelotrichales;Erysipelotrichaceae;NA
OTU0430	0	168	0	0	0	Bacteria;Firmicutes;Erysipelotrichia;Erysipelotrichales;Erysipelotrichaceae;Solobacterium
OTU0660	0	0	0	0	43	Bacteria;Firmicutes;Erysipelotrichia;Erysipelotrichales;Erysipelotrichaceae;Turicibacter
OTU1307	0	0	0	0	7	Bacteria;Firmicutes;NA;NA;NA;NA
OTU0359	0	0	0	214	0	Bacteria;Firmicutes;Negativicutes;Selenomonadales;Acidaminococcaceae;Acidaminococcus
OTU0697	0	0	0	0	0	Bacteria;Firmicutes;Negativicutes;Selenomonadales;Veillonellaceae;Dialister
OTU0990	0	0	0	0	0	Bacteria;Firmicutes;Negativicutes;Selenomonadales;Veillonellaceae;Dialister
OTU0196	0	0	0	121	0	Bacteria;Firmicutes;Negativicutes;Selenomonadales;Veillonellaceae;Selenomonas_3
OTU0411	0	0	0	185	0	Bacteria;Firmicutes;Negativicutes;Selenomonadales;Veillonellaceae;Veillonella
OTU0622	86	0	0	0	0	Bacteria;Firmicutes;Negativicutes;Selenomonadales;Veillonellaceae;Veillonella
OTU0016	0	3593	0	0	0	Bacteria;Fusobacteria;Fusobacteriia;Fusobacteriales;Fusobacteriaceae;Fusobacterium
OTU0138	960	0	0	0	0	Bacteria;Fusobacteria;Fusobacteriia;Fusobacteriales;Fusobacteriaceae;Fusobacterium
OTU0046	959	0	0	0	0	Bacteria;Fusobacteria;Fusobacteriia;Fusobacteriales;Fusobacteriaceae;Fusobacterium
OTU0244	419	0	0	0	0	Bacteria;Fusobacteria;Fusobacteriia;Fusobacteriales;Fusobacteriaceae;Fusobacterium
OTU0073	161	0	0	0	0	Bacteria;Fusobacteria;Fusobacteriia;Fusobacteriales;Fusobacteriaceae;Fusobacterium
OTU0644	0	81	0	0	0	Bacteria;Fusobacteria;Fusobacteriia;Fusobacteriales;Fusobacteriaceae;Fusobacterium
OTU0904	40	0	0	0	0	Bacteria;Fusobacteria;Fusobacteriia;Fusobacteriales;Fusobacteriaceae;Fusobacterium
OTU1083	25	0	0	0	0	Bacteria;Fusobacteria;Fusobacteriia;Fusobacteriales;Fusobacteriaceae;Fusobacterium
OTU1100	23	0	0	0	0	Bacteria;Fusobacteria;Fusobacteriia;Fusobacteriales;Fusobacteriaceae;Fusobacterium
OTU0149	462	0	0	0	0	Bacteria;Fusobacteria;Fusobacteriia;Fusobacteriales;Leptotrichiaceae;Leptotrichia
OTU0373	150	0	0	0	0	Bacteria;Fusobacteria;Fusobacteriia;Fusobacteriales;Leptotrichiaceae;Leptotrichia
OTU0567	100	0	0	0	0	Bacteria;Fusobacteria;Fusobacteriia;Fusobacteriales;Leptotrichiaceae;Leptotrichia
OTU0827	0	0	0	0	0	Bacteria;Gemmatimonadetes;BD2-11_terrestrial_group;NA;NA;NA
OTU1196	0	0	14	0	0	Bacteria;Gemmatimonadetes;BD2-11_terrestrial_group;NA;NA;NA
OTU0332	0	0	0	0	133	Bacteria;Lentisphaerae;Lentisphaeria;Victivallales;Victivallaceae;Victivallis
OTU1316	0	0	0	0	6	Bacteria;NA;NA;NA;NA;NA
OTU1008	0	0	0	0	0	Bacteria;Omnitrophica;NA;NA;NA;NA
OTU0334	0	0	0	245	0	Bacteria;Parcubacteria;Candidatus_Jorgensenbacteria;NA;NA;NA
OTU0655	0	0	55	0	0	Bacteria;Planctomycetes;BD7-11;NA;NA;NA
OTU1166	0	0	0	0	0	Bacteria;Planctomycetes;OM190;NA;NA;NA
OTU1197	0	0	14	0	0	Bacteria;Planctomycetes;Phycisphaerae;Phycisphaerales;Phycisphaeraceae;CL500-3
OTU0552	0	0	0	0	0	Bacteria;Planctomycetes;Planctomycetacia;Planctomycetales;Planctomycetaceae;Gemmata
OTU1293	0	0	0	0	0	Bacteria;Planctomycetes;Planctomycetacia;Planctomycetales;Planctomycetaceae;Pir4_lineage
OTU0636	0	0	0	0	0	Bacteria;Planctomycetes;Planctomycetacia;Planctomycetales;Planctomycetaceae;Pirellula
OTU0939	0	0	0	0	0	Bacteria;Planctomycetes;Planctomycetacia;Planctomycetales;Planctomycetaceae;Planctomyces
OTU0066	0	0	0	0	0	Bacteria;Proteobacteria;Alphaproteobacteria;Caulobacterales;Caulobacteraceae;Brevundimonas
OTU0215	0	0	0	0	0	Bacteria;Proteobacteria;Alphaproteobacteria;Caulobacterales;Caulobacteraceae;Brevundimonas
OTU0857	0	0	0	0	0	Bacteria;Proteobacteria;Alphaproteobacteria;Caulobacterales;Caulobacteraceae;Brevundimonas
OTU1144	0	0	18	0	0	Bacteria;Proteobacteria;Alphaproteobacteria;Caulobacterales;Caulobacteraceae;Brevundimonas
OTU0798	32	0	7	0	0	Bacteria;Proteobacteria;Alphaproteobacteria;Caulobacterales;Caulobacteraceae;NA
OTU0972	0	0	0	0	0	Bacteria;Proteobacteria;Alphaproteobacteria;Caulobacterales;Caulobacteraceae;Phenylobacterium
OTU0900	0	0	0	0	0	Bacteria;Proteobacteria;Alphaproteobacteria;Caulobacterales;Hyphomonadaceae;Hirschia
OTU0971	0	0	0	0	0	Bacteria;Proteobacteria;Alphaproteobacteria;Caulobacterales;Hyphomonadaceae;Woodsholea
OTU1267	0	0	0	0	0	Bacteria;Proteobacteria;Alphaproteobacteria;NA;NA;NA
OTU0071	0	0	0	0	0	Bacteria;Proteobacteria;Alphaproteobacteria;Rhizobiales;Aurantimonadaceae;Aureimonas
OTU0756	0	57	0	0	0	Bacteria;Proteobacteria;Alphaproteobacteria;Rhizobiales;Aurantimonadaceae;NA
OTU0847	0	46	0	0	0	Bacteria;Proteobacteria;Alphaproteobacteria;Rhizobiales;Aurantimonadaceae;NA
OTU0377	0	0	142	0	0	Bacteria;Proteobacteria;Alphaproteobacteria;Rhizobiales;Bradyrhizobiaceae;Bradyrhizobium
OTU0443	0	95	0	0	0	Bacteria;Proteobacteria;Alphaproteobacteria;Rhizobiales;Bradyrhizobiaceae;Bradyrhizobium
OTU0483	0	0	49	0	0	Bacteria;Proteobacteria;Alphaproteobacteria;Rhizobiales;Bradyrhizobiaceae;NA
OTU0856	0	0	0	0	0	Bacteria;Proteobacteria;Alphaproteobacteria;Rhizobiales;Brucellaceae;Paenochrobactrum
OTU0858	0	0	0	0	0	Bacteria;Proteobacteria;Alphaproteobacteria;Rhizobiales;Hyphomicrobiaceae;Hyphomicrobium
OTU0988	0	0	0	0	0	Bacteria;Proteobacteria;Alphaproteobacteria;Rhizobiales;Hyphomicrobiaceae;Hyphomicrobium
OTU0992	0	0	0	0	0	Bacteria;Proteobacteria;Alphaproteobacteria;Rhizobiales;Hyphomicrobiaceae;Hyphomicrobium
OTU0781	0	0	0	0	0	Bacteria;Proteobacteria;Alphaproteobacteria;Rhizobiales;Hyphomicrobiaceae;NA
OTU0681	0	0	0	0	0	Bacteria;Proteobacteria;Alphaproteobacteria;Rhizobiales;Hyphomicrobiaceae;Pedomicrobium
OTU0531	0	64	0	0	0	Bacteria;Proteobacteria;Alphaproteobacteria;Rhizobiales;Methylobacteriaceae;Methylobacterium
OTU0734	0	0	0	0	0	Bacteria;Proteobacteria;Alphaproteobacteria;Rhizobiales;Methylobacteriaceae;Methylobacterium
OTU0832	0	47	0	0	0	Bacteria;Proteobacteria;Alphaproteobacteria;Rhizobiales;Methylobacteriaceae;Methylobacterium
OTU0579	0	0	0	0	0	Bacteria;Proteobacteria;Alphaproteobacteria;Rhizobiales;Methylobacteriaceae;Methylobacterium
OTU0815	0	0	0	0	0	Bacteria;Proteobacteria;Alphaproteobacteria;Rhizobiales;Methylobacteriaceae;Microvirga
OTU1048	0	0	0	0	0	Bacteria;Proteobacteria;Alphaproteobacteria;Rhizobiales;Methylobacteriaceae;NA
OTU0765	0	0	0	0	0	Bacteria;Proteobacteria;Alphaproteobacteria;Rhizobiales;Methylocystaceae;Pleomorphomonas
OTU0751	0	0	0	0	0	Bacteria;Proteobacteria;Alphaproteobacteria;Rhizobiales;NA;NA
OTU0820	0	0	0	0	0	Bacteria;Proteobacteria;Alphaproteobacteria;Rhizobiales;Phyllobacteriaceae;Mesorhizobium
OTU0833	0	0	47	0	0	Bacteria;Proteobacteria;Alphaproteobacteria;Rhizobiales;Phyllobacteriaceae;Mesorhizobium
OTU0889	0	0	0	0	0	Bacteria;Proteobacteria;Alphaproteobacteria;Rhizobiales;Phyllobacteriaceae;Mesorhizobium
OTU1076	0	0	0	0	0	Bacteria;Proteobacteria;Alphaproteobacteria;Rhizobiales;Phyllobacteriaceae;Mesorhizobium
OTU0336	0	0	0	193	0	Bacteria;Proteobacteria;Alphaproteobacteria;Rhizobiales;Rhizobiaceae;Rhizobium
OTU0692	0	0	0	0	0	Bacteria;Proteobacteria;Alphaproteobacteria;Rhizobiales;Rhizobiaceae;Rhizobium
OTU0968	0	0	34	0	0	Bacteria;Proteobacteria;Alphaproteobacteria;Rhizobiales;Rhodobiaceae;NA
OTU0744	0	0	0	0	0	Bacteria;Proteobacteria;Alphaproteobacteria;Rhizobiales;Xanthobacteraceae;Variibacter
OTU1002	0	0	32	0	0	Bacteria;Proteobacteria;Alphaproteobacteria;Rhizobiales;Xanthobacteraceae;Variibacter
OTU0710	0	0	0	0	0	Bacteria;Proteobacteria;Alphaproteobacteria;Rhizobiales;Xanthobacteraceae;Xanthobacter
OTU0350	0	0	0	0	0	Bacteria;Proteobacteria;Alphaproteobacteria;Rhodobacterales;Rhodobacteraceae;Amaricoccus
OTU0685	0	0	0	0	0	Bacteria;Proteobacteria;Alphaproteobacteria;Rhodobacterales;Rhodobacteraceae;Gemmobacter
OTU0740	0	0	0	0	0	Bacteria;Proteobacteria;Alphaproteobacteria;Rhodobacterales;Rhodobacteraceae;NA
OTU0048	0	0	0	0	0	Bacteria;Proteobacteria;Alphaproteobacteria;Rhodobacterales;Rhodobacteraceae;Paracoccus
OTU0041	0	0	0	268	0	Bacteria;Proteobacteria;Alphaproteobacteria;Rhodobacterales;Rhodobacteraceae;Paracoccus
OTU0070	0	0	0	0	0	Bacteria;Proteobacteria;Alphaproteobacteria;Rhodobacterales;Rhodobacteraceae;Paracoccus
OTU0239	0	0	0	0	0	Bacteria;Proteobacteria;Alphaproteobacteria;Rhodobacterales;Rhodobacteraceae;Paracoccus
OTU0203	0	0	0	0	0	Bacteria;Proteobacteria;Alphaproteobacteria;Rhodobacterales;Rhodobacteraceae;Paracoccus
OTU0250	0	0	164	0	0	Bacteria;Proteobacteria;Alphaproteobacteria;Rhodobacterales;Rhodobacteraceae;Paracoccus
OTU0731	0	0	0	0	0	Bacteria;Proteobacteria;Alphaproteobacteria;Rhodobacterales;Rhodobacteraceae;Paracoccus
OTU1061	0	0	0	0	0	Bacteria;Proteobacteria;Alphaproteobacteria;Rhodobacterales;Rhodobacteraceae;Rhodobacter
OTU1040	0	0	0	0	0	Bacteria;Proteobacteria;Alphaproteobacteria;Rhodobacterales;Rhodobacteraceae;Rubellimicrobium
OTU0743	0	0	0	0	0	Bacteria;Proteobacteria;Alphaproteobacteria;Rhodobacterales;Rhodobacteraceae;Tropicimonas
OTU1294	0	0	0	8	0	Bacteria;Proteobacteria;Alphaproteobacteria;Rhodospirillales;Acetobacteraceae;Craurococcus
OTU0286	45	0	0	0	0	Bacteria;Proteobacteria;Alphaproteobacteria;Rhodospirillales;Acetobacteraceae;Rhodovarius
OTU0093	0	0	0	0	0	Bacteria;Proteobacteria;Alphaproteobacteria;Rhodospirillales;Acetobacteraceae;Roseomonas
OTU0416	0	0	0	181	0	Bacteria;Proteobacteria;Alphaproteobacteria;Rhodospirillales;Acetobacteraceae;Roseomonas
OTU0345	0	0	0	0	0	Bacteria;Proteobacteria;Alphaproteobacteria;Rhodospirillales;Acetobacteraceae;Roseomonas
OTU0136	0	0	0	0	509	Bacteria;Proteobacteria;Alphaproteobacteria;Rhodospirillales;Rhodospirillaceae;NA
OTU0618	0	0	0	0	56	Bacteria;Proteobacteria;Alphaproteobacteria;Rhodospirillales;Rhodospirillaceae;NA
OTU1034	0	0	0	0	19	Bacteria;Proteobacteria;Alphaproteobacteria;Rhodospirillales;Rhodospirillaceae;NA
OTU1270	0	0	9	0	0	Bacteria;Proteobacteria;Alphaproteobacteria;Rhodospirillales;Rhodospirillaceae;Skermanella
OTU0492	0	0	0	0	0	Bacteria;Proteobacteria;Alphaproteobacteria;Rhodospirillales;Rhodospirillales_Incertae_Sedis;Geminicoccus
OTU0819	0	0	0	0	0	Bacteria;Proteobacteria;Alphaproteobacteria;Rhodospirillales;Rhodospirillales_Incertae_Sedis;Reyranella
OTU1245	0	0	11	0	0	Bacteria;Proteobacteria;Alphaproteobacteria;Rickettsiales;Holosporaceae;NA
OTU0141	0	0	0	212	0	Bacteria;Proteobacteria;Alphaproteobacteria;Rickettsiales;Mitochondria;NA
OTU1041	0	0	0	29	0	Bacteria;Proteobacteria;Alphaproteobacteria;Rickettsiales;Mitochondria;NA
OTU1096	0	0	24	0	0	Bacteria;Proteobacteria;Alphaproteobacteria;Rickettsiales;Mitochondria;NA
OTU1151	0	0	0	0	0	Bacteria;Proteobacteria;Alphaproteobacteria;Rickettsiales;Mitochondria;NA
OTU1250	0	0	0	0	0	Bacteria;Proteobacteria;Alphaproteobacteria;Rickettsiales;Mitochondria;NA
OTU0777	0	0	0	0	0	Bacteria;Proteobacteria;Alphaproteobacteria;Sphingomonadales;Ellin6055;NA
OTU0788	0	0	52	0	0	Bacteria;Proteobacteria;Alphaproteobacteria;Sphingomonadales;Erythrobacteraceae;Altererythrobacter
OTU1075	0	0	0	0	0	Bacteria;Proteobacteria;Alphaproteobacteria;Sphingomonadales;Sphingomonadaceae;NA
OTU0572	0	0	25	0	0	Bacteria;Proteobacteria;Alphaproteobacteria;Sphingomonadales;Sphingomonadaceae;Novosphingobium
OTU0840	0	0	0	0	0	Bacteria;Proteobacteria;Alphaproteobacteria;Sphingomonadales;Sphingomonadaceae;Novosphingobium
OTU1074	0	0	0	0	0	Bacteria;Proteobacteria;Alphaproteobacteria;Sphingomonadales;Sphingomonadaceae;Novosphingobium
OTU0300	0	284	0	0	0	Bacteria;Proteobacteria;Alphaproteobacteria;Sphingomonadales;Sphingomonadaceae;Sphingobium
OTU0733	0	0	0	0	0	Bacteria;Proteobacteria;Alphaproteobacteria;Sphingomonadales;Sphingomonadaceae;Sphingobium
OTU0108	0	0	0	1000	0	Bacteria;Proteobacteria;Alphaproteobacteria;Sphingomonadales;Sphingomonadaceae;Sphingomonas
OTU0406	0	0	22	0	0	Bacteria;Proteobacteria;Alphaproteobacteria;Sphingomonadales;Sphingomonadaceae;Sphingomonas
OTU0217	0	0	19	0	0	Bacteria;Proteobacteria;Alphaproteobacteria;Sphingomonadales;Sphingomonadaceae;Sphingomonas
OTU0635	0	0	0	0	0	Bacteria;Proteobacteria;Alphaproteobacteria;Sphingomonadales;Sphingomonadaceae;Sphingomonas
OTU1035	0	0	29	0	0	Bacteria;Proteobacteria;Alphaproteobacteria;Sphingomonadales;Sphingomonadaceae;Sphingomonas
OTU1172	0	0	16	0	0	Bacteria;Proteobacteria;Alphaproteobacteria;Sphingomonadales;Sphingomonadaceae;Sphingomonas
OTU0759	0	0	0	0	0	Bacteria;Proteobacteria;Betaproteobacteria;Burkholderiales;Alcaligenaceae;Bordetella
OTU0675	0	0	0	0	40	Bacteria;Proteobacteria;Betaproteobacteria;Burkholderiales;Alcaligenaceae;Parasutterella
OTU0079	0	70	0	0	902	Bacteria;Proteobacteria;Betaproteobacteria;Burkholderiales;Alcaligenaceae;Sutterella
OTU0628	0	0	56	0	0	Bacteria;Proteobacteria;Betaproteobacteria;Burkholderiales;Burkholderiaceae;Burkholderia-Paraburkholderia
OTU0720	0	0	28	0	0	Bacteria;Proteobacteria;Betaproteobacteria;Burkholderiales;Burkholderiaceae;Burkholderia-Paraburkholderia
OTU0058	965	0	0	116	0	Bacteria;Proteobacteria;Betaproteobacteria;Burkholderiales;Burkholderiaceae;Lautropia
OTU0365	0	0	0	223	0	Bacteria;Proteobacteria;Betaproteobacteria;Burkholderiales;Burkholderiaceae;Lautropia
OTU0523	118	0	0	0	0	Bacteria;Proteobacteria;Betaproteobacteria;Burkholderiales;Burkholderiaceae;Lautropia
OTU0943	36	0	0	0	0	Bacteria;Proteobacteria;Betaproteobacteria;Burkholderiales;Burkholderiaceae;Lautropia
OTU1029	0	0	0	0	0	Bacteria;Proteobacteria;Betaproteobacteria;Burkholderiales;Burkholderiaceae;Lautropia
OTU0845	46	0	0	0	0	Bacteria;Proteobacteria;Betaproteobacteria;Burkholderiales;Burkholderiaceae;Ralstonia
OTU0119	0	0	0	0	0	Bacteria;Proteobacteria;Betaproteobacteria;Burkholderiales;Comamonadaceae;Curvibacter
OTU0769	0	0	0	0	0	Bacteria;Proteobacteria;Betaproteobacteria;Burkholderiales;Comamonadaceae;Hydrogenophaga
OTU0824	0	0	0	0	0	Bacteria;Proteobacteria;Betaproteobacteria;Burkholderiales;Comamonadaceae;Limnohabitans
OTU0301	0	0	0	182	0	Bacteria;Proteobacteria;Betaproteobacteria;Burkholderiales;Comamonadaceae;NA
OTU0841	0	0	0	0	0	Bacteria;Proteobacteria;Betaproteobacteria;Burkholderiales;Comamonadaceae;NA
OTU1062	0	0	0	0	0	Bacteria;Proteobacteria;Betaproteobacteria;Burkholderiales;Comamonadaceae;NA
OTU0688	0	0	0	70	0	Bacteria;Proteobacteria;Betaproteobacteria;Burkholderiales;Comamonadaceae;Pelomonas
OTU0915	0	0	0	0	0	Bacteria;Proteobacteria;Betaproteobacteria;Burkholderiales;Comamonadaceae;Polaromonas
OTU0584	0	0	0	0	0	Bacteria;Proteobacteria;Betaproteobacteria;Burkholderiales;Comamonadaceae;Tepidimonas
OTU0823	0	0	0	0	0	Bacteria;Proteobacteria;Betaproteobacteria;Burkholderiales;Comamonadaceae;Xenophilus
OTU0905	0	0	40	0	0	Bacteria;Proteobacteria;Betaproteobacteria;Burkholderiales;Comamonadaceae;Xylophilus
OTU0991	0	0	0	0	0	Bacteria;Proteobacteria;Betaproteobacteria;Burkholderiales;NA;NA
OTU1258	0	2	0	0	0	Bacteria;Proteobacteria;Betaproteobacteria;Burkholderiales;NA;NA
OTU1115	0	0	21	0	0	Bacteria;Proteobacteria;Betaproteobacteria;Burkholderiales;Oxalobacteraceae;Duganella
OTU0445	0	0	0	0	0	Bacteria;Proteobacteria;Betaproteobacteria;Burkholderiales;Oxalobacteraceae;Massilia
OTU0464	0	0	0	0	0	Bacteria;Proteobacteria;Betaproteobacteria;Burkholderiales;Oxalobacteraceae;Massilia
OTU1220	0	0	13	0	0	Bacteria;Proteobacteria;Betaproteobacteria;Burkholderiales;Oxalobacteraceae;Massilia
OTU0353	232	0	0	0	0	Bacteria;Proteobacteria;Betaproteobacteria;Burkholderiales;Oxalobacteraceae;NA
OTU0844	0	0	0	0	28	Bacteria;Proteobacteria;Betaproteobacteria;Burkholderiales;Oxalobacteraceae;Oxalobacter
OTU0923	0	0	0	0	0	Bacteria;Proteobacteria;Betaproteobacteria;Hydrogenophilales;Hydrogenophilaceae;NA
OTU1108	0	0	0	0	0	Bacteria;Proteobacteria;Betaproteobacteria;Hydrogenophilales;Hydrogenophilaceae;NA
OTU1178	0	15	0	0	0	Bacteria;Proteobacteria;Betaproteobacteria;Hydrogenophilales;Hydrogenophilaceae;NA
OTU0097	404	0	0	0	0	Bacteria;Proteobacteria;Betaproteobacteria;Neisseriales;Neisseriaceae;Kingella
OTU0030	1460	0	0	701	0	Bacteria;Proteobacteria;Betaproteobacteria;Neisseriales;Neisseriaceae;Neisseria
OTU0090	0	0	43	0	0	Bacteria;Proteobacteria;Betaproteobacteria;Neisseriales;Neisseriaceae;Neisseria
OTU0515	0	0	71	0	0	Bacteria;Proteobacteria;Betaproteobacteria;Neisseriales;Neisseriaceae;Vogesella
OTU0719	63	0	0	0	0	Bacteria;Proteobacteria;Betaproteobacteria;Nitrosomonadales;Gallionellaceae;NA
OTU0961	0	0	0	0	0	Bacteria;Proteobacteria;Betaproteobacteria;Rhodocyclales;Rhodocyclaceae;Azoarcus
OTU0962	0	0	0	0	0	Bacteria;Proteobacteria;Betaproteobacteria;Rhodocyclales;Rhodocyclaceae;Azoarcus
OTU0407	0	139	0	4	25	Bacteria;Proteobacteria;Deltaproteobacteria;Desulfovibrionales;Desulfovibrionaceae;Bilophila
OTU1042	0	0	0	0	29	Bacteria;Proteobacteria;Deltaproteobacteria;Desulfovibrionales;Desulfovibrionaceae;Desulfovibrio
OTU0608	0	0	0	0	0	Bacteria;Proteobacteria;Deltaproteobacteria;Myxococcales;BIrii41;NA
OTU1113	0	0	21	0	0	Bacteria;Proteobacteria;Deltaproteobacteria;Myxococcales;BIrii41;NA
OTU1102	0	0	23	0	0	Bacteria;Proteobacteria;Deltaproteobacteria;Myxococcales;Polyangiaceae;Sorangium
OTU0322	76	0	0	179	0	Bacteria;Proteobacteria;Epsilonproteobacteria;Campylobacterales;Campylobacteraceae;Campylobacter
OTU0371	0	0	0	216	0	Bacteria;Proteobacteria;Epsilonproteobacteria;Campylobacterales;Campylobacteraceae;Campylobacter
OTU0589	0	95	0	0	0	Bacteria;Proteobacteria;Epsilonproteobacteria;Campylobacterales;Campylobacteraceae;Campylobacter
OTU0952	0	0	0	0	0	Bacteria;Proteobacteria;Gammaproteobacteria;Aeromonadales;Aeromonadaceae;Tolumonas
OTU1007	0	0	0	0	0	Bacteria;Proteobacteria;Gammaproteobacteria;Aeromonadales;Aeromonadaceae;Tolumonas
OTU0235	0	0	0	459	0	Bacteria;Proteobacteria;Gammaproteobacteria;Alteromonadales;Alteromonadaceae;Marinobacter
OTU0242	32	0	0	389	0	Bacteria;Proteobacteria;Gammaproteobacteria;Cardiobacteriales;Cardiobacteriaceae;Cardiobacterium
OTU0884	0	0	0	43	0	Bacteria;Proteobacteria;Gammaproteobacteria;Cardiobacteriales;Cardiobacteriaceae;Cardiobacterium
OTU0836	0	0	0	0	0	Bacteria;Proteobacteria;Gammaproteobacteria;Chromatiales;Chromatiaceae;Rheinheimera
OTU0639	0	38	27	0	0	Bacteria;Proteobacteria;Gammaproteobacteria;Enterobacteriales;Enterobacteriaceae;Citrobacter
OTU0926	0	0	0	0	0	Bacteria;Proteobacteria;Gammaproteobacteria;Enterobacteriales;Enterobacteriaceae;Morganella
OTU0104	0	0	0	467	0	Bacteria;Proteobacteria;Gammaproteobacteria;Enterobacteriales;Enterobacteriaceae;NA
OTU0826	0	0	0	0	0	Bacteria;Proteobacteria;Gammaproteobacteria;Enterobacteriales;Enterobacteriaceae;NA
OTU1077	0	0	0	0	0	Bacteria;Proteobacteria;Gammaproteobacteria;Legionellales;Legionellaceae;Legionella
OTU1332	0	0	4	0	0	Bacteria;Proteobacteria;Gammaproteobacteria;Legionellales;Legionellaceae;Legionella
OTU0729	0	0	0	0	0	Bacteria;Proteobacteria;Gammaproteobacteria;NA;NA;NA
OTU0849	0	0	0	0	0	Bacteria;Proteobacteria;Gammaproteobacteria;NA;NA;NA
OTU0468	145	0	0	0	0	Bacteria;Proteobacteria;Gammaproteobacteria;Oceanospirillales;Alcanivoracaceae;Alcanivorax
OTU0469	145	0	0	0	0	Bacteria;Proteobacteria;Gammaproteobacteria;Oceanospirillales;Alcanivoracaceae;Alcanivorax
OTU0599	0	93	0	0	0	Bacteria;Proteobacteria;Gammaproteobacteria;Oceanospirillales;Alcanivoracaceae;Alcanivorax
OTU1101	0	23	0	0	0	Bacteria;Proteobacteria;Gammaproteobacteria;Oceanospirillales;Alcanivoracaceae;Alcanivorax
OTU0814	0	0	0	0	0	Bacteria;Proteobacteria;Gammaproteobacteria;Oceanospirillales;Halomonadaceae;Halomonas
OTU1161	0	0	17	0	0	Bacteria;Proteobacteria;Gammaproteobacteria;Oceanospirillales;Halomonadaceae;Halomonas
OTU0730	0	0	61	0	0	Bacteria;Proteobacteria;Gammaproteobacteria;Oceanospirillales;Saccharospirillaceae;Saccharospirillum
OTU1120	0	0	0	0	0	Bacteria;Proteobacteria;Gammaproteobacteria;Pasteurellales;Pasteurellaceae;Actinobacillus
OTU0609	0	0	12	0	0	Bacteria;Proteobacteria;Gammaproteobacteria;Pasteurellales;Pasteurellaceae;Actinobacillus
OTU0026	1979	0	108	558	30	Bacteria;Proteobacteria;Gammaproteobacteria;Pasteurellales;Pasteurellaceae;Haemophilus
OTU0044	1795	0	0	0	0	Bacteria;Proteobacteria;Gammaproteobacteria;Pasteurellales;Pasteurellaceae;Haemophilus
OTU0508	124	0	0	0	0	Bacteria;Proteobacteria;Gammaproteobacteria;Pasteurellales;Pasteurellaceae;NA
OTU1012	0	0	0	0	32	Bacteria;Proteobacteria;Gammaproteobacteria;Pasteurellales;Pasteurellaceae;NA
OTU0193	0	0	0	0	0	Bacteria;Proteobacteria;Gammaproteobacteria;Pseudomonadales;Moraxellaceae;Acinetobacter
OTU0307	0	0	48	0	0	Bacteria;Proteobacteria;Gammaproteobacteria;Pseudomonadales;Moraxellaceae;Acinetobacter
OTU0954	0	0	0	0	0	Bacteria;Proteobacteria;Gammaproteobacteria;Pseudomonadales;Moraxellaceae;Acinetobacter
OTU0432	0	0	20	0	0	Bacteria;Proteobacteria;Gammaproteobacteria;Pseudomonadales;Moraxellaceae;Acinetobacter
OTU0013	0	0	59	2512	2	Bacteria;Proteobacteria;Gammaproteobacteria;Pseudomonadales;Moraxellaceae;Enhydrobacter
OTU0481	0	0	0	139	0	Bacteria;Proteobacteria;Gammaproteobacteria;Pseudomonadales;Moraxellaceae;Enhydrobacter
OTU0865	0	0	44	0	0	Bacteria;Proteobacteria;Gammaproteobacteria;Pseudomonadales;Moraxellaceae;Psychrobacter
OTU0953	0	0	0	0	0	Bacteria;Proteobacteria;Gammaproteobacteria;Pseudomonadales;Moraxellaceae;Psychrobacter
OTU0004	1600	0	221	0	0	Bacteria;Proteobacteria;Gammaproteobacteria;Pseudomonadales;Pseudomonadaceae;Pseudomonas
OTU0153	0	109	40	694	0	Bacteria;Proteobacteria;Gammaproteobacteria;Pseudomonadales;Pseudomonadaceae;Pseudomonas
OTU0312	0	0	0	270	0	Bacteria;Proteobacteria;Gammaproteobacteria;Pseudomonadales;Pseudomonadaceae;Pseudomonas
OTU0705	0	0	66	0	0	Bacteria;Proteobacteria;Gammaproteobacteria;Pseudomonadales;Pseudomonadaceae;Pseudomonas
OTU0652	0	0	0	0	0	Bacteria;Proteobacteria;Gammaproteobacteria;Pseudomonadales;Pseudomonadaceae;Pseudomonas
OTU0663	0	0	0	0	0	Bacteria;Proteobacteria;Gammaproteobacteria;Thiotrichales;Thiotrichaceae;Thiothrix
OTU1051	0	0	0	0	0	Bacteria;Proteobacteria;Gammaproteobacteria;Thiotrichales;Thiotrichaceae;Thiothrix
OTU0629	0	0	30	0	0	Bacteria;Proteobacteria;Gammaproteobacteria;Xanthomonadales;Xanthomonadaceae;Luteibacter
OTU0055	0	0	0	0	0	Bacteria;Proteobacteria;Gammaproteobacteria;Xanthomonadales;Xanthomonadaceae;Pseudoxanthomonas
OTU1306	0	0	0	0	0	Bacteria;Proteobacteria;Gammaproteobacteria;Xanthomonadales;Xanthomonadaceae;Pseudoxanthomonas
OTU0330	0	0	0	241	0	Bacteria;Proteobacteria;Gammaproteobacteria;Xanthomonadales;Xanthomonadaceae;Stenotrophomonas
OTU1049	0	0	0	0	0	Bacteria;Proteobacteria;Gammaproteobacteria;Xanthomonadales;Xanthomonadaceae;Stenotrophomonas
OTU0811	0	0	50	0	0	Bacteria;Proteobacteria;Gammaproteobacteria;Xanthomonadales;Xanthomonadaceae;Thermomonas
OTU0899	0	0	0	0	0	Bacteria;Proteobacteria;Gammaproteobacteria;Xanthomonadales;Xanthomonadaceae;Thermomonas
OTU1263	0	0	10	0	0	Bacteria;Proteobacteria;Gammaproteobacteria;Xanthomonadales;Xanthomonadales_Incertae_Sedis;Acidibacter
OTU0969	0	0	34	0	0	Bacteria;Proteobacteria;Gammaproteobacteria;Xanthomonadales;Xanthomonadales_Incertae_Sedis;NA
OTU0161	0	0	0	775	0	Bacteria;Proteobacteria;NA;NA;NA;NA
OTU1092	24	0	0	0	0	Bacteria;Saccharibacteria;NA;NA;NA;NA
OTU1290	0	0	0	0	0	Bacteria;Saccharibacteria;NA;NA;NA;NA
OTU1292	0	0	0	0	0	Bacteria;Saccharibacteria;NA;NA;NA;NA
OTU1302	0	0	7	0	0	Bacteria;Saccharibacteria;NA;NA;NA;NA
OTU1321	0	0	5	0	0	Bacteria;SBR1093;NA;NA;NA;NA
OTU0945	0	36	0	0	0	Bacteria;Synergistetes;Synergistia;Synergistales;Synergistaceae;Pyramidobacter
OTU0077	0	0	0	0	863	Bacteria;Tenericutes;Mollicutes;Mollicutes_RF9;NA;NA
OTU0822	48	0	0	0	0	Bacteria;Tenericutes;Mollicutes;Mollicutes_RF9;NA;NA
OTU1308	0	0	0	0	7	Bacteria;Tenericutes;Mollicutes;Mollicutes_RF9;NA;NA
OTU0281	0	0	0	0	175	Bacteria;Tenericutes;Mollicutes;NB1-n;NA;NA
OTU1021	0	0	0	0	0	Bacteria;TM6_(Dependentiae);NA;NA;NA;NA
OTU0982	0	0	33	0	0	Bacteria;Verrucomicrobia;Opitutae;Opitutales;Opitutaceae;Opitutus
OTU1160	0	0	17	0	0	Bacteria;Verrucomicrobia;Opitutae;Opitutales;Opitutaceae;Opitutus
OTU1334	0	0	0	0	0	Bacteria;Verrucomicrobia;Spartobacteria;Chthoniobacterales;Chthoniobacteraceae;Chthoniobacter
OTU0839	0	0	0	0	0	Bacteria;Verrucomicrobia;Verrucomicrobiae;Verrucomicrobiales;DEV007;NA
OTU0448	0	141	0	0	0	Eukaryota;Euglenozoa;Euglenida;Aphagea;Aphagea_fa;Distigma
OTU0087	0	508	0	0	0	Eukaryota;NA;NA;NA;NA;NA
OTU0666	0	75	0	0	0	Eukaryota;NA;NA;NA;NA;NA
OTU0715	0	58	0	0	0	Eukaryota;NA;NA;NA;NA;NA
OTU0808	0	50	0	0	0	Eukaryota;NA;NA;NA;NA;NA
OTU1053	0	27	0	0	0	Eukaryota;NA;NA;NA;NA;NA
OTU1126	0	19	0	0	0	Eukaryota;NA;NA;NA;NA;NA
OTU1127	0	12	7	0	0	Eukaryota;NA;NA;NA;NA;NA
OTU1179	0	15	0	0	0	Eukaryota;NA;NA;NA;NA;NA
OTU1215	0	13	0	0	0	Eukaryota;NA;NA;NA;NA;NA
OTU1244	0	0	11	0	0	Eukaryota;NA;NA;NA;NA;NA
OTU1264	0	0	10	0	0	Eukaryota;NA;NA;NA;NA;NA
OTU1269	0	9	0	0	0	Eukaryota;NA;NA;NA;NA;NA
OTU1283	0	8	0	0	0	Eukaryota;NA;NA;NA;NA;NA
OTU1314	0	6	0	0	0	Eukaryota;NA;NA;NA;NA;NA
OTU0255	0	386	0	0	0	NA;NA;NA;NA;NA;NA
OTU0638	0	0	0	83	0	NA;NA;NA;NA;NA;NA
OTU0946	0	0	36	0	0	NA;NA;NA;NA;NA;NA
OTU1343	0	0	2	0	0	NA;NA;NA;NA;NA;NA

## Sheet: biom_PCR9
Supplementary table 1e - biom table obtained after DADA2 analysis from the primer pair 515FB-806RB
#OTU ID	oral-9	appendix-9	nose-9	skin-9	stool-9	taxonomy
OTU0803	0	0	0	0	0	Archaea;Euryarchaeota;Methanobacteria;Methanobacteriales;Methanobacteriaceae;Methanobacterium
OTU0641	0	0	82	0	0	Bacteria;Acidobacteria;Subgroup_2;NA;NA;NA
OTU0536	0	0	25	0	0	Bacteria;Acidobacteria;Subgroup_2;NA;NA;NA
OTU1230	0	0	12	0	0	Bacteria;Acidobacteria;Subgroup_6;NA;NA;NA
OTU1200	0	0	14	0	0	Bacteria;Actinobacteria;Acidimicrobiia;Acidimicrobiales;Acidimicrobiaceae;CL500-29_marine_group
OTU0713	0	0	0	0	0	Bacteria;Actinobacteria;Acidimicrobiia;Acidimicrobiales;NA;NA
OTU0076	502	0	13	193	0	Bacteria;Actinobacteria;Actinobacteria;Actinomycetales;Actinomycetaceae;Actinomyces
OTU0231	466	0	0	0	0	Bacteria;Actinobacteria;Actinobacteria;Actinomycetales;Actinomycetaceae;Actinomyces
OTU0266	270	0	0	0	0	Bacteria;Actinobacteria;Actinobacteria;Actinomycetales;Actinomycetaceae;Actinomyces
OTU0389	0	0	0	200	0	Bacteria;Actinobacteria;Actinobacteria;Actinomycetales;Actinomycetaceae;Actinomyces
OTU0911	0	0	0	0	0	Bacteria;Actinobacteria;Actinobacteria;Actinomycetales;Actinomycetaceae;Actinomyces
OTU0381	37	0	0	0	0	Bacteria;Actinobacteria;Actinobacteria;Actinomycetales;Actinomycetaceae;Actinomyces
OTU0399	0	0	0	196	0	Bacteria;Actinobacteria;Actinobacteria;Bifidobacteriales;Bifidobacteriaceae;Alloscardovia
OTU0027	0	0	0	0	3834	Bacteria;Actinobacteria;Actinobacteria;Bifidobacteriales;Bifidobacteriaceae;Bifidobacterium
OTU0451	0	0	0	0	86	Bacteria;Actinobacteria;Actinobacteria;Bifidobacteriales;Bifidobacteriaceae;Bifidobacterium
OTU0741	0	0	0	0	26	Bacteria;Actinobacteria;Actinobacteria;Bifidobacteriales;Bifidobacteriaceae;Bifidobacterium
OTU0114	75	0	0	333	0	Bacteria;Actinobacteria;Actinobacteria;Corynebacteriales;Corynebacteriaceae;Corynebacterium
OTU0363	0	0	0	224	0	Bacteria;Actinobacteria;Actinobacteria;Corynebacteriales;Corynebacteriaceae;Corynebacterium
OTU0303	0	0	0	199	0	Bacteria;Actinobacteria;Actinobacteria;Corynebacteriales;Corynebacteriaceae;Corynebacterium
OTU0766	0	0	0	56	0	Bacteria;Actinobacteria;Actinobacteria;Corynebacteriales;Corynebacteriaceae;Corynebacterium
OTU1066	0	0	0	27	0	Bacteria;Actinobacteria;Actinobacteria;Corynebacteriales;Corynebacteriaceae;Corynebacterium
OTU0010	0	0	0	0	0	Bacteria;Actinobacteria;Actinobacteria;Corynebacteriales;Corynebacteriaceae;Corynebacterium_1
OTU0012	0	0	8727	0	0	Bacteria;Actinobacteria;Actinobacteria;Corynebacteriales;Corynebacteriaceae;Corynebacterium_1
OTU0025	0	0	3434	0	0	Bacteria;Actinobacteria;Actinobacteria;Corynebacteriales;Corynebacteriaceae;Corynebacterium_1
OTU0241	0	0	0	423	0	Bacteria;Actinobacteria;Actinobacteria;Corynebacteriales;Corynebacteriaceae;Corynebacterium_1
OTU0263	0	0	0	0	0	Bacteria;Actinobacteria;Actinobacteria;Corynebacteriales;Corynebacteriaceae;Corynebacterium_1
OTU0316	0	0	168	0	0	Bacteria;Actinobacteria;Actinobacteria;Corynebacteriales;Corynebacteriaceae;Corynebacterium_1
OTU0449	0	0	0	156	0	Bacteria;Actinobacteria;Actinobacteria;Corynebacteriales;Corynebacteriaceae;Corynebacterium_1
OTU0687	0	0	0	0	0	Bacteria;Actinobacteria;Actinobacteria;Corynebacteriales;Corynebacteriaceae;Corynebacterium_1
OTU0735	0	0	0	0	0	Bacteria;Actinobacteria;Actinobacteria;Corynebacteriales;Corynebacteriaceae;Corynebacterium_1
OTU1105	0	0	23	0	0	Bacteria;Actinobacteria;Actinobacteria;Corynebacteriales;Corynebacteriaceae;Corynebacterium_1
OTU0011	0	0	6367	1840	0	Bacteria;Actinobacteria;Actinobacteria;Corynebacteriales;Corynebacteriaceae;Lawsonella
OTU0135	0	0	625	0	0	Bacteria;Actinobacteria;Actinobacteria;Corynebacteriales;Corynebacteriaceae;Lawsonella
OTU0930	0	0	0	0	0	Bacteria;Actinobacteria;Actinobacteria;Corynebacteriales;Mycobacteriaceae;Mycobacterium
OTU1174	0	0	16	0	0	Bacteria;Actinobacteria;Actinobacteria;Corynebacteriales;Mycobacteriaceae;Mycobacterium
OTU1136	0	0	0	0	0	Bacteria;Actinobacteria;Actinobacteria;Corynebacteriales;Nocardiaceae;Williamsia
OTU0794	0	0	0	0	0	Bacteria;Actinobacteria;Actinobacteria;Frankiales;Geodermatophilaceae;Blastococcus
OTU1148	0	0	18	0	0	Bacteria;Actinobacteria;Actinobacteria;Frankiales;Geodermatophilaceae;Blastococcus
OTU0423	0	0	0	175	0	Bacteria;Actinobacteria;Actinobacteria;Frankiales;Geodermatophilaceae;Geodermatophilus
OTU1265	0	0	10	0	0	Bacteria;Actinobacteria;Actinobacteria;Kineosporiales;Kineosporiaceae;NA
OTU0050	0	0	0	0	0	Bacteria;Actinobacteria;Actinobacteria;Micrococcales;Brevibacteriaceae;Brevibacterium
OTU0130	0	0	0	0	0	Bacteria;Actinobacteria;Actinobacteria;Micrococcales;Brevibacteriaceae;Brevibacterium
OTU0128	0	0	0	0	0	Bacteria;Actinobacteria;Actinobacteria;Micrococcales;Dermabacteraceae;Brachybacterium
OTU0249	0	0	0	0	0	Bacteria;Actinobacteria;Actinobacteria;Micrococcales;Dermabacteraceae;Brachybacterium
OTU0052	0	0	0	0	0	Bacteria;Actinobacteria;Actinobacteria;Micrococcales;Dermacoccaceae;NA
OTU0057	0	0	0	0	0	Bacteria;Actinobacteria;Actinobacteria;Micrococcales;Intrasporangiaceae;Janibacter
OTU1235	0	0	0	0	0	Bacteria;Actinobacteria;Actinobacteria;Micrococcales;Intrasporangiaceae;Janibacter
OTU1236	0	0	0	0	0	Bacteria;Actinobacteria;Actinobacteria;Micrococcales;Intrasporangiaceae;Janibacter
OTU0866	0	0	23	0	0	Bacteria;Actinobacteria;Actinobacteria;Micrococcales;Intrasporangiaceae;Phycicoccus
OTU0796	0	0	0	0	0	Bacteria;Actinobacteria;Actinobacteria;Micrococcales;Microbacteriaceae;Curtobacterium
OTU0738	0	34	0	26	0	Bacteria;Actinobacteria;Actinobacteria;Micrococcales;Microbacteriaceae;Microbacterium
OTU1162	0	0	17	0	0	Bacteria;Actinobacteria;Actinobacteria;Micrococcales;Microbacteriaceae;NA
OTU0821	0	0	0	0	0	Bacteria;Actinobacteria;Actinobacteria;Micrococcales;Microbacteriaceae;Rathayibacter
OTU0094	0	0	0	0	0	Bacteria;Actinobacteria;Actinobacteria;Micrococcales;Microbacteriaceae;Zimmermannella
OTU0191	0	0	0	0	0	Bacteria;Actinobacteria;Actinobacteria;Micrococcales;Micrococcaceae;Citricoccus
OTU0035	0	0	0	3080	0	Bacteria;Actinobacteria;Actinobacteria;Micrococcales;Micrococcaceae;Kocuria
OTU0394	0	0	0	199	0	Bacteria;Actinobacteria;Actinobacteria;Micrococcales;Micrococcaceae;Kocuria
OTU1019	0	0	31	0	0	Bacteria;Actinobacteria;Actinobacteria;Micrococcales;Micrococcaceae;Kocuria
OTU0029	0	0	0	1740	0	Bacteria;Actinobacteria;Actinobacteria;Micrococcales;Micrococcaceae;Micrococcus
OTU0570	0	0	0	100	0	Bacteria;Actinobacteria;Actinobacteria;Micrococcales;Micrococcaceae;Micrococcus
OTU0702	0	0	0	67	0	Bacteria;Actinobacteria;Actinobacteria;Micrococcales;Micrococcaceae;Micrococcus
OTU0368	0	0	0	220	0	Bacteria;Actinobacteria;Actinobacteria;Micrococcales;Micrococcaceae;Rothia
OTU0269	0	0	0	0	0	Bacteria;Actinobacteria;Actinobacteria;Micrococcales;Micrococcaceae;Rothia
OTU0656	0	0	43	0	0	Bacteria;Actinobacteria;Actinobacteria;Micrococcales;Micrococcaceae;Rothia
OTU1057	0	0	27	0	0	Bacteria;Actinobacteria;Actinobacteria;Micromonosporales;Micromonosporaceae;Virgisporangium
OTU0767	0	0	0	56	0	Bacteria;Actinobacteria;Actinobacteria;NA;NA;NA
OTU1130	0	0	19	0	0	Bacteria;Actinobacteria;Actinobacteria;Propionibacteriales;Nocardioidaceae;Aeromicrobium
OTU0558	0	0	0	104	0	Bacteria;Actinobacteria;Actinobacteria;Propionibacteriales;Nocardioidaceae;Marmoricola
OTU1145	0	0	18	0	0	Bacteria;Actinobacteria;Actinobacteria;Propionibacteriales;Nocardioidaceae;Nocardioides
OTU0994	0	0	0	33	0	Bacteria;Actinobacteria;Actinobacteria;Propionibacteriales;Propionibacteriaceae;NA
OTU0033	0	0	125	2748	0	Bacteria;Actinobacteria;Actinobacteria;Propionibacteriales;Propionibacteriaceae;Propionibacterium
OTU0853	0	0	0	46	0	Bacteria;Actinobacteria;Actinobacteria;Propionibacteriales;Propionibacteriaceae;Propionibacterium
OTU1271	0	0	9	0	0	Bacteria;Actinobacteria;Actinobacteria;Pseudonocardiales;Pseudonocardiaceae;Pseudonocardia
OTU0489	0	0	0	0	76	Bacteria;Actinobacteria;Coriobacteriia;Coriobacteriales;Coriobacteriaceae;Adlercreutzia
OTU0261	0	0	0	0	125	Bacteria;Actinobacteria;Coriobacteriia;Coriobacteriales;Coriobacteriaceae;Collinsella
OTU0977	0	0	0	0	19	Bacteria;Actinobacteria;Coriobacteriia;Coriobacteriales;Coriobacteriaceae;Gordonibacter
OTU0338	0	0	0	0	126	Bacteria;Actinobacteria;Coriobacteriia;Coriobacteriales;Coriobacteriaceae;NA
OTU1336	0	0	0	0	4	Bacteria;Actinobacteria;Coriobacteriia;Coriobacteriales;Coriobacteriaceae;NA
OTU1229	0	0	12	0	0	Bacteria;Actinobacteria;Thermoleophilia;Gaiellales;NA;NA
OTU1164	0	0	17	0	0	Bacteria;Actinobacteria;Thermoleophilia;Solirubrobacterales;Elev-16S-1332;NA
OTU0795	0	0	0	0	0	Bacteria;Actinobacteria;Thermoleophilia;Solirubrobacterales;FFCH13075;NA
OTU1026	0	0	30	0	0	Bacteria;Actinobacteria;Thermoleophilia;Solirubrobacterales;Patulibacteraceae;Patulibacter
OTU0009	0	0	0	7673	0	Bacteria;Bacteroidetes;Bacteroidia;Bacteroidales;Bacteroidaceae;Bacteroides
OTU0039	0	2334	0	0	0	Bacteria;Bacteroidetes;Bacteroidia;Bacteroidales;Bacteroidaceae;Bacteroides
OTU0069	0	0	0	0	914	Bacteria;Bacteroidetes;Bacteroidia;Bacteroidales;Bacteroidaceae;Bacteroides
OTU0115	0	884	0	0	27	Bacteria;Bacteroidetes;Bacteroidia;Bacteroidales;Bacteroidaceae;Bacteroides
OTU0086	0	244	0	0	536	Bacteria;Bacteroidetes;Bacteroidia;Bacteroidales;Bacteroidaceae;Bacteroides
OTU0075	0	0	0	382	0	Bacteria;Bacteroidetes;Bacteroidia;Bacteroidales;Bacteroidaceae;Bacteroides
OTU0105	0	0	0	0	663	Bacteria;Bacteroidetes;Bacteroidia;Bacteroidales;Bacteroidaceae;Bacteroides
OTU0166	0	0	0	0	358	Bacteria;Bacteroidetes;Bacteroidia;Bacteroidales;Bacteroidaceae;Bacteroides
OTU0185	0	0	0	0	330	Bacteria;Bacteroidetes;Bacteroidia;Bacteroidales;Bacteroidaceae;Bacteroides
OTU0192	0	0	0	0	291	Bacteria;Bacteroidetes;Bacteroidia;Bacteroidales;Bacteroidaceae;Bacteroides
OTU0256	0	0	0	0	178	Bacteria;Bacteroidetes;Bacteroidia;Bacteroidales;Bacteroidaceae;Bacteroides
OTU0259	0	0	0	0	146	Bacteria;Bacteroidetes;Bacteroidia;Bacteroidales;Bacteroidaceae;Bacteroides
OTU0444	0	82	0	0	32	Bacteria;Bacteroidetes;Bacteroidia;Bacteroidales;Bacteroidaceae;Bacteroides
OTU0378	0	0	0	0	98	Bacteria;Bacteroidetes;Bacteroidia;Bacteroidales;Bacteroidaceae;Bacteroides
OTU0391	0	0	0	0	98	Bacteria;Bacteroidetes;Bacteroidia;Bacteroidales;Bacteroidaceae;Bacteroides
OTU0390	0	0	0	0	77	Bacteria;Bacteroidetes;Bacteroidia;Bacteroidales;Bacteroidaceae;Bacteroides
OTU0672	0	74	0	0	0	Bacteria;Bacteroidetes;Bacteroidia;Bacteroidales;Bacteroidaceae;Bacteroides
OTU0467	0	0	0	0	68	Bacteria;Bacteroidetes;Bacteroidia;Bacteroidales;Bacteroidaceae;Bacteroides
OTU0723	0	0	0	0	0	Bacteria;Bacteroidetes;Bacteroidia;Bacteroidales;Bacteroidaceae;Bacteroides
OTU0761	0	0	0	57	0	Bacteria;Bacteroidetes;Bacteroidia;Bacteroidales;Bacteroidaceae;Bacteroides
OTU0779	0	53	0	0	0	Bacteria;Bacteroidetes;Bacteroidia;Bacteroidales;Bacteroidaceae;Bacteroides
OTU0591	0	0	0	0	45	Bacteria;Bacteroidetes;Bacteroidia;Bacteroidales;Bacteroidaceae;Bacteroides
OTU0912	0	0	0	0	40	Bacteria;Bacteroidetes;Bacteroidia;Bacteroidales;Bacteroidaceae;Bacteroides
OTU1031	0	0	0	0	0	Bacteria;Bacteroidetes;Bacteroidia;Bacteroidales;Bacteroidaceae;Bacteroides
OTU0068	0	0	0	0	1098	Bacteria;Bacteroidetes;Bacteroidia;Bacteroidales;Bacteroidales_S24-7_group;NA
OTU0176	0	0	0	0	357	Bacteria;Bacteroidetes;Bacteroidia;Bacteroidales;Bacteroidales_S24-7_group;NA
OTU0533	112	0	0	0	0	Bacteria;Bacteroidetes;Bacteroidia;Bacteroidales;Marinilabiaceae;Alkaliflexus
OTU0405	0	190	0	0	0	Bacteria;Bacteroidetes;Bacteroidia;Bacteroidales;Porphyromonadaceae;Barnesiella
OTU0494	0	0	0	0	55	Bacteria;Bacteroidetes;Bacteroidia;Bacteroidales;Porphyromonadaceae;Butyricimonas
OTU0772	0	0	0	0	0	Bacteria;Bacteroidetes;Bacteroidia;Bacteroidales;Porphyromonadaceae;Dysgonomonas
OTU1341	0	0	0	0	3	Bacteria;Bacteroidetes;Bacteroidia;Bacteroidales;Porphyromonadaceae;NA
OTU0619	0	0	0	0	31	Bacteria;Bacteroidetes;Bacteroidia;Bacteroidales;Porphyromonadaceae;Odoribacter
OTU0143	0	0	0	0	397	Bacteria;Bacteroidetes;Bacteroidia;Bacteroidales;Porphyromonadaceae;Parabacteroides
OTU0400	0	0	0	0	90	Bacteria;Bacteroidetes;Bacteroidia;Bacteroidales;Porphyromonadaceae;Parabacteroides
OTU0598	0	0	0	0	44	Bacteria;Bacteroidetes;Bacteroidia;Bacteroidales;Porphyromonadaceae;Parabacteroides
OTU0718	0	0	0	0	30	Bacteria;Bacteroidetes;Bacteroidia;Bacteroidales;Porphyromonadaceae;Parabacteroides
OTU0056	1305	0	0	576	0	Bacteria;Bacteroidetes;Bacteroidia;Bacteroidales;Porphyromonadaceae;Porphyromonas
OTU0504	126	0	0	0	0	Bacteria;Bacteroidetes;Bacteroidia;Bacteroidales;Porphyromonadaceae;Porphyromonas
OTU0708	65	0	0	0	0	Bacteria;Bacteroidetes;Bacteroidia;Bacteroidales;Porphyromonadaceae;Porphyromonas
OTU1248	0	0	11	0	0	Bacteria;Bacteroidetes;Bacteroidia;Bacteroidales;Porphyromonadaceae;Porphyromonas
OTU0422	0	175	0	0	0	Bacteria;Bacteroidetes;Bacteroidia;Bacteroidales;Porphyromonadaceae;Tannerella
OTU0098	0	871	0	0	0	Bacteria;Bacteroidetes;Bacteroidia;Bacteroidales;Prevotellaceae;Alloprevotella
OTU0173	0	501	0	0	0	Bacteria;Bacteroidetes;Bacteroidia;Bacteroidales;Prevotellaceae;Alloprevotella
OTU0157	0	322	0	0	0	Bacteria;Bacteroidetes;Bacteroidia;Bacteroidales;Prevotellaceae;Alloprevotella
OTU1198	0	0	14	0	0	Bacteria;Bacteroidetes;Bacteroidia;Bacteroidales;Prevotellaceae;Alloprevotella
OTU0642	0	0	0	0	0	Bacteria;Bacteroidetes;Bacteroidia;Bacteroidales;Prevotellaceae;Prevotella
OTU1303	0	0	7	0	0	Bacteria;Bacteroidetes;Bacteroidia;Bacteroidales;Prevotellaceae;Prevotella
OTU0310	237	0	0	0	0	Bacteria;Bacteroidetes;Bacteroidia;Bacteroidales;Prevotellaceae;Prevotella_2
OTU0944	36	0	0	0	0	Bacteria;Bacteroidetes;Bacteroidia;Bacteroidales;Prevotellaceae;Prevotella_2
OTU0222	0	0	0	0	233	Bacteria;Bacteroidetes;Bacteroidia;Bacteroidales;Rikenellaceae;Alistipes
OTU0309	0	153	0	0	48	Bacteria;Bacteroidetes;Bacteroidia;Bacteroidales;Rikenellaceae;Alistipes
OTU0305	0	0	0	0	128	Bacteria;Bacteroidetes;Bacteroidia;Bacteroidales;Rikenellaceae;Alistipes
OTU0335	0	0	0	0	102	Bacteria;Bacteroidetes;Bacteroidia;Bacteroidales;Rikenellaceae;Alistipes
OTU0455	0	0	0	0	46	Bacteria;Bacteroidetes;Bacteroidia;Bacteroidales;Rikenellaceae;Alistipes
OTU0633	0	0	0	0	42	Bacteria;Bacteroidetes;Bacteroidia;Bacteroidales;Rikenellaceae;Alistipes
OTU0512	0	0	0	0	37	Bacteria;Bacteroidetes;Bacteroidia;Bacteroidales;Rikenellaceae;Alistipes
OTU0442	0	0	0	0	0	Bacteria;Bacteroidetes;Cytophagia;Cytophagales;Cytophagaceae;Adhaeribacter
OTU0870	0	0	0	0	0	Bacteria;Bacteroidetes;Cytophagia;Cytophagales;Cytophagaceae;Adhaeribacter
OTU0588	0	0	0	0	0	Bacteria;Bacteroidetes;Cytophagia;Cytophagales;Cytophagaceae;Hymenobacter
OTU0804	0	0	0	0	0	Bacteria;Bacteroidetes;Cytophagia;Cytophagales;Cytophagaceae;Hymenobacter
OTU0349	234	0	0	0	0	Bacteria;Bacteroidetes;Flavobacteriia;Flavobacteriales;Flavobacteriaceae;Bergeyella
OTU0578	0	0	27	0	0	Bacteria;Bacteroidetes;Flavobacteriia;Flavobacteriales;Flavobacteriaceae;Bergeyella
OTU0061	1795	0	0	0	0	Bacteria;Bacteroidetes;Flavobacteriia;Flavobacteriales;Flavobacteriaceae;Capnocytophaga
OTU0110	0	0	0	905	0	Bacteria;Bacteroidetes;Flavobacteriia;Flavobacteriales;Flavobacteriaceae;Capnocytophaga
OTU0122	725	0	0	0	0	Bacteria;Bacteroidetes;Flavobacteriia;Flavobacteriales;Flavobacteriaceae;Capnocytophaga
OTU0582	97	0	0	0	0	Bacteria;Bacteroidetes;Flavobacteriia;Flavobacteriales;Flavobacteriaceae;Capnocytophaga
OTU0343	65	0	0	0	0	Bacteria;Bacteroidetes;Flavobacteriia;Flavobacteriales;Flavobacteriaceae;Capnocytophaga
OTU0042	0	0	0	0	0	Bacteria;Bacteroidetes;Flavobacteriia;Flavobacteriales;Flavobacteriaceae;Cloacibacterium
OTU0665	0	0	0	0	0	Bacteria;Bacteroidetes;Flavobacteriia;Flavobacteriales;Flavobacteriaceae;Empedobacter
OTU1088	0	0	9	0	0	Bacteria;Bacteroidetes;Flavobacteriia;Flavobacteriales;Flavobacteriaceae;Flavobacterium
OTU0529	0	0	0	0	56	Bacteria;Bacteroidetes;Flavobacteriia;Flavobacteriales;NA;NA
OTU1111	0	0	22	0	0	Bacteria;Bacteroidetes;Sphingobacteriia;Sphingobacteriales;Chitinophagaceae;Ferruginibacter
OTU1005	0	0	32	0	0	Bacteria;Bacteroidetes;Sphingobacteriia;Sphingobacteriales;Chitinophagaceae;Flavisolibacter
OTU1018	0	0	31	0	0	Bacteria;Bacteroidetes;Sphingobacteriia;Sphingobacteriales;Chitinophagaceae;Flavisolibacter
OTU0728	0	0	36	0	0	Bacteria;Bacteroidetes;Sphingobacteriia;Sphingobacteriales;Chitinophagaceae;Hydrotalea
OTU0906	0	0	40	0	0	Bacteria;Bacteroidetes;Sphingobacteriia;Sphingobacteriales;Chitinophagaceae;Sediminibacterium
OTU0682	0	0	0	0	0	Bacteria;Bacteroidetes;Sphingobacteriia;Sphingobacteriales;Chitinophagaceae;Segetibacter
OTU0929	0	0	0	0	0	Bacteria;Bacteroidetes;Sphingobacteriia;Sphingobacteriales;Chitinophagaceae;Segetibacter
OTU0140	0	0	0	949	0	Bacteria;Bacteroidetes;Sphingobacteriia;Sphingobacteriales;Sphingobacteriaceae;Pedobacter
OTU0465	0	0	0	0	0	Bacteria;Bacteroidetes;Sphingobacteriia;Sphingobacteriales;Sphingobacteriaceae;Pedobacter
OTU1273	0	0	9	0	0	Bacteria;Chlamydiae;Chlamydiae;Chlamydiales;Simkaniaceae;NA
OTU0960	0	0	35	0	0	Bacteria;Chloroflexi;KD4-96;NA;NA;NA
OTU1147	0	0	18	0	0	Bacteria;Chloroflexi;KD4-96;NA;NA;NA
OTU0816	0	0	0	50	0	Bacteria;Cyanobacteria;Cyanobacteria;SubsectionII;FamilyII;Chroococcidiopsis
OTU0385	0	0	0	0	112	Bacteria;Cyanobacteria;Melainabacteria;Gastranaerophilales;NA;NA
OTU1038	0	0	29	0	0	Bacteria;Cyanobacteria;Melainabacteria;Obscuribacterales;NA;NA
OTU0984	0	0	33	0	0	Bacteria;Deinococcus-Thermus;Deinococci;Deinococcales;Deinococcaceae;Deinococcus
OTU1322	0	0	5	0	0	Bacteria;Deinococcus-Thermus;Deinococci;Deinococcales;Deinococcaceae;Deinococcus
OTU0268	0	0	0	0	0	Bacteria;Deinococcus-Thermus;Deinococci;Thermales;Thermaceae;Meiothermus
OTU0604	91	0	0	0	0	Bacteria;Firmicutes;Bacilli;Bacillales;Bacillaceae;Anaerobacillus
OTU0024	688	0	64	3164	0	Bacteria;Firmicutes;Bacilli;Bacillales;Family_XI;Gemella
OTU0225	0	0	0	487	0	Bacteria;Firmicutes;Bacilli;Bacillales;Family_XI;Gemella
OTU0690	69	0	0	0	0	Bacteria;Firmicutes;Bacilli;Bacillales;Family_XI;Gemella
OTU0431	167	0	0	0	0	Bacteria;Firmicutes;Bacilli;Bacillales;Family_XII;Exiguobacterium
OTU0985	0	0	33	0	0	Bacteria;Firmicutes;Bacilli;Bacillales;Staphylococcaceae;Jeotgalicoccus
OTU1059	0	0	27	0	0	Bacteria;Firmicutes;Bacilli;Bacillales;Staphylococcaceae;Nosocomiicoccus
OTU0007	0	0	9102	1848	0	Bacteria;Firmicutes;Bacilli;Bacillales;Staphylococcaceae;Staphylococcus
OTU0219	0	0	241	0	0	Bacteria;Firmicutes;Bacilli;Bacillales;Staphylococcaceae;Staphylococcus
OTU0124	503	0	30	0	0	Bacteria;Firmicutes;Bacilli;Lactobacillales;Aerococcaceae;Abiotrophia
OTU0274	126	0	0	0	0	Bacteria;Firmicutes;Bacilli;Lactobacillales;Aerococcaceae;Abiotrophia
OTU1228	0	0	12	0	0	Bacteria;Firmicutes;Bacilli;Lactobacillales;Aerococcaceae;Aerococcus
OTU0163	0	0	0	37	0	Bacteria;Firmicutes;Bacilli;Lactobacillales;Carnobacteriaceae;Alkalibacterium
OTU0234	0	0	0	0	0	Bacteria;Firmicutes;Bacilli;Lactobacillales;Carnobacteriaceae;Alkalibacterium
OTU1036	0	0	29	0	0	Bacteria;Firmicutes;Bacilli;Lactobacillales;Carnobacteriaceae;Desemzia
OTU0126	0	0	544	0	0	Bacteria;Firmicutes;Bacilli;Lactobacillales;Carnobacteriaceae;Dolosigranulum
OTU0053	2055	0	45	272	0	Bacteria;Firmicutes;Bacilli;Lactobacillales;Carnobacteriaceae;Granulicatella
OTU0252	0	0	0	395	0	Bacteria;Firmicutes;Bacilli;Lactobacillales;Carnobacteriaceae;Granulicatella
OTU0376	211	0	0	0	0	Bacteria;Firmicutes;Bacilli;Lactobacillales;Carnobacteriaceae;Granulicatella
OTU0864	44	0	0	0	0	Bacteria;Firmicutes;Bacilli;Lactobacillales;Carnobacteriaceae;Granulicatella
OTU0109	544	0	0	0	323	Bacteria;Firmicutes;Bacilli;Lactobacillales;Enterococcaceae;Enterococcus
OTU0145	681	0	0	0	0	Bacteria;Firmicutes;Bacilli;Lactobacillales;Enterococcaceae;Enterococcus
OTU0083	0	0	0	834	0	Bacteria;Firmicutes;Bacilli;Lactobacillales;Lactobacillaceae;Lactobacillus
OTU0092	0	0	36	0	0	Bacteria;Firmicutes;Bacilli;Lactobacillales;Lactobacillaceae;Lactobacillus
OTU0919	0	0	38	0	0	Bacteria;Firmicutes;Bacilli;Lactobacillales;Lactobacillaceae;Lactobacillus
OTU0979	33	0	0	0	0	Bacteria;Firmicutes;Bacilli;Lactobacillales;NA;NA
OTU0123	0	0	478	0	0	Bacteria;Firmicutes;Bacilli;Lactobacillales;Streptococcaceae;Lactococcus
OTU0983	0	0	33	0	0	Bacteria;Firmicutes;Bacilli;Lactobacillales;Streptococcaceae;Lactococcus
OTU0006	10834	0	357	3244	0	Bacteria;Firmicutes;Bacilli;Lactobacillales;Streptococcaceae;Streptococcus
OTU0015	5409	0	14	1172	0	Bacteria;Firmicutes;Bacilli;Lactobacillales;Streptococcaceae;Streptococcus
OTU0100	0	0	0	996	35	Bacteria;Firmicutes;Bacilli;Lactobacillales;Streptococcaceae;Streptococcus
OTU0181	0	620	0	0	0	Bacteria;Firmicutes;Bacilli;Lactobacillales;Streptococcaceae;Streptococcus
OTU0120	465	0	0	0	0	Bacteria;Firmicutes;Bacilli;Lactobacillales;Streptococcaceae;Streptococcus
OTU0267	0	0	0	345	0	Bacteria;Firmicutes;Bacilli;Lactobacillales;Streptococcaceae;Streptococcus
OTU0495	130	0	0	0	0	Bacteria;Firmicutes;Bacilli;Lactobacillales;Streptococcaceae;Streptococcus
OTU0583	97	0	0	0	0	Bacteria;Firmicutes;Bacilli;Lactobacillales;Streptococcaceae;Streptococcus
OTU1110	0	0	22	0	0	Bacteria;Firmicutes;Bacilli;Lactobacillales;Streptococcaceae;Streptococcus
OTU0342	0	0	0	0	124	Bacteria;Firmicutes;Clostridia;Clostridiales;Christensenellaceae;Christensenellaceae_R-7_group
OTU0736	0	0	0	0	27	Bacteria;Firmicutes;Clostridia;Clostridiales;Christensenellaceae;Christensenellaceae_R-7_group
OTU1300	0	0	0	0	8	Bacteria;Firmicutes;Clostridia;Clostridiales;Christensenellaceae;Christensenellaceae_R-7_group
OTU1311	0	0	0	0	7	Bacteria;Firmicutes;Clostridia;Clostridiales;Christensenellaceae;NA
OTU0565	0	0	0	0	0	Bacteria;Firmicutes;Clostridia;Clostridiales;Clostridiaceae_1;Clostridium_sensu_stricto_18
OTU0595	0	0	0	0	0	Bacteria;Firmicutes;Clostridia;Clostridiales;Clostridiaceae_1;Clostridium_sensu_stricto_5
OTU0793	0	0	0	0	0	Bacteria;Firmicutes;Clostridia;Clostridiales;Clostridiaceae_3;Clostridiisalibacter
OTU0260	0	0	0	0	190	Bacteria;Firmicutes;Clostridia;Clostridiales;Clostridiales_vadinBB60_group;NA
OTU0997	0	0	0	0	16	Bacteria;Firmicutes;Clostridia;Clostridiales;Clostridiales_vadinBB60_group;NA
OTU0187	0	0	336	0	0	Bacteria;Firmicutes;Clostridia;Clostridiales;Family_XI;Anaerococcus
OTU0514	0	0	0	0	0	Bacteria;Firmicutes;Clostridia;Clostridiales;Family_XI;Anaerococcus
OTU0314	0	0	42	0	0	Bacteria;Firmicutes;Clostridia;Clostridiales;Family_XI;Anaerococcus
OTU0940	0	0	0	0	0	Bacteria;Firmicutes;Clostridia;Clostridiales;Family_XI;Anaerococcus
OTU0085	0	0	201	0	0	Bacteria;Firmicutes;Clostridia;Clostridiales;Family_XI;Finegoldia
OTU0165	0	513	0	0	0	Bacteria;Firmicutes;Clostridia;Clostridiales;Family_XI;Parvimonas
OTU0051	0	0	1698	0	0	Bacteria;Firmicutes;Clostridia;Clostridiales;Family_XI;Peptoniphilus
OTU1080	0	0	0	0	26	Bacteria;Firmicutes;Clostridia;Clostridiales;Family_XIII;Family_XIII_AD3011_group
OTU0831	0	0	0	0	23	Bacteria;Firmicutes;Clostridia;Clostridiales;Family_XIII;Family_XIII_AD3011_group
OTU1033	0	0	0	0	10	Bacteria;Firmicutes;Clostridia;Clostridiales;Family_XIII;Family_XIII_AD3011_group
OTU0501	0	0	0	0	68	Bacteria;Firmicutes;Clostridia;Clostridiales;Family_XIII;Family_XIII_UCG-001
OTU0358	226	0	0	0	0	Bacteria;Firmicutes;Clostridia;Clostridiales;Lachnospiraceae;Anaerosporobacter
OTU0121	0	0	0	0	585	Bacteria;Firmicutes;Clostridia;Clostridiales;Lachnospiraceae;Anaerostipes
OTU0230	0	0	0	0	211	Bacteria;Firmicutes;Clostridia;Clostridiales;Lachnospiraceae;Anaerostipes
OTU0151	0	0	0	0	424	Bacteria;Firmicutes;Clostridia;Clostridiales;Lachnospiraceae;Blautia
OTU0308	0	0	0	0	145	Bacteria;Firmicutes;Clostridia;Clostridiales;Lachnospiraceae;Blautia
OTU0313	0	0	0	0	122	Bacteria;Firmicutes;Clostridia;Clostridiales;Lachnospiraceae;Blautia
OTU0428	0	0	0	0	111	Bacteria;Firmicutes;Clostridia;Clostridiales;Lachnospiraceae;Blautia
OTU0461	0	0	0	0	87	Bacteria;Firmicutes;Clostridia;Clostridiales;Lachnospiraceae;Blautia
OTU0437	0	0	0	0	79	Bacteria;Firmicutes;Clostridia;Clostridiales;Lachnospiraceae;Blautia
OTU0392	0	0	0	0	98	Bacteria;Firmicutes;Clostridia;Clostridiales;Lachnospiraceae;Coprococcus_1
OTU0876	0	0	0	0	44	Bacteria;Firmicutes;Clostridia;Clostridiales;Lachnospiraceae;Coprococcus_1
OTU0279	0	0	0	0	133	Bacteria;Firmicutes;Clostridia;Clostridiales;Lachnospiraceae;Coprococcus_3
OTU0375	0	0	0	0	106	Bacteria;Firmicutes;Clostridia;Clostridiales;Lachnospiraceae;Dorea
OTU0621	0	0	0	0	48	Bacteria;Firmicutes;Clostridia;Clostridiales;Lachnospiraceae;Dorea
OTU0210	0	0	0	0	259	Bacteria;Firmicutes;Clostridia;Clostridiales;Lachnospiraceae;Fusicatenibacter
OTU0500	0	0	0	0	65	Bacteria;Firmicutes;Clostridia;Clostridiales;Lachnospiraceae;Fusicatenibacter
OTU1193	14	0	0	0	0	Bacteria;Firmicutes;Clostridia;Clostridiales;Lachnospiraceae;Johnsonella
OTU0088	854	0	0	0	0	Bacteria;Firmicutes;Clostridia;Clostridiales;Lachnospiraceae;Lachnoanaerobaculum
OTU0346	86	0	0	0	0	Bacteria;Firmicutes;Clostridia;Clostridiales;Lachnospiraceae;Lachnoanaerobaculum
OTU1224	0	0	0	0	13	Bacteria;Firmicutes;Clostridia;Clostridiales;Lachnospiraceae;Lachnoclostridium
OTU0113	0	0	0	0	592	Bacteria;Firmicutes;Clostridia;Clostridiales;Lachnospiraceae;Lachnospira
OTU0285	0	0	0	0	126	Bacteria;Firmicutes;Clostridia;Clostridiales;Lachnospiraceae;Lachnospira
OTU0602	0	0	0	0	44	Bacteria;Firmicutes;Clostridia;Clostridiales;Lachnospiraceae;Lachnospiraceae_FCS020_group
OTU0352	0	0	0	0	112	Bacteria;Firmicutes;Clostridia;Clostridiales;Lachnospiraceae;Lachnospiraceae_ND3007_group
OTU0180	0	0	0	0	325	Bacteria;Firmicutes;Clostridia;Clostridiales;Lachnospiraceae;Lachnospiraceae_NK4A136_group
OTU0528	0	0	0	0	45	Bacteria;Firmicutes;Clostridia;Clostridiales;Lachnospiraceae;Lachnospiraceae_NK4A136_group
OTU0996	0	0	0	0	15	Bacteria;Firmicutes;Clostridia;Clostridiales;Lachnospiraceae;Lachnospiraceae_NK4B4_group
OTU0328	0	0	0	0	117	Bacteria;Firmicutes;Clostridia;Clostridiales;Lachnospiraceae;Lachnospiraceae_UCG-001
OTU0942	0	0	0	0	37	Bacteria;Firmicutes;Clostridia;Clostridiales;Lachnospiraceae;Lachnospiraceae_UCG-004
OTU1068	0	0	0	0	27	Bacteria;Firmicutes;Clostridia;Clostridiales;Lachnospiraceae;Lachnospiraceae_UCG-010
OTU0356	0	0	0	0	131	Bacteria;Firmicutes;Clostridia;Clostridiales;Lachnospiraceae;Marvinbryantia
OTU0366	0	0	0	0	101	Bacteria;Firmicutes;Clostridia;Clostridiales;Lachnospiraceae;Marvinbryantia
OTU0038	0	0	0	0	2109	Bacteria;Firmicutes;Clostridia;Clostridiales;Lachnospiraceae;NA
OTU0327	0	0	0	0	124	Bacteria;Firmicutes;Clostridia;Clostridiales;Lachnospiraceae;NA
OTU0364	0	0	0	0	101	Bacteria;Firmicutes;Clostridia;Clostridiales;Lachnospiraceae;NA
OTU0401	0	0	0	0	101	Bacteria;Firmicutes;Clostridia;Clostridiales;Lachnospiraceae;NA
OTU0435	0	0	0	0	83	Bacteria;Firmicutes;Clostridia;Clostridiales;Lachnospiraceae;NA
OTU0471	0	0	0	0	81	Bacteria;Firmicutes;Clostridia;Clostridiales;Lachnospiraceae;NA
OTU0517	0	0	0	0	50	Bacteria;Firmicutes;Clostridia;Clostridiales;Lachnospiraceae;NA
OTU0592	0	0	0	0	47	Bacteria;Firmicutes;Clostridia;Clostridiales;Lachnospiraceae;NA
OTU0854	0	0	0	0	46	Bacteria;Firmicutes;Clostridia;Clostridiales;Lachnospiraceae;NA
OTU0678	0	0	0	0	38	Bacteria;Firmicutes;Clostridia;Clostridiales;Lachnospiraceae;NA
OTU0670	0	0	0	0	35	Bacteria;Firmicutes;Clostridia;Clostridiales;Lachnospiraceae;NA
OTU0817	0	0	0	0	25	Bacteria;Firmicutes;Clostridia;Clostridiales;Lachnospiraceae;NA
OTU1140	0	0	0	0	19	Bacteria;Firmicutes;Clostridia;Clostridiales;Lachnospiraceae;NA
OTU0059	0	0	0	0	1431	Bacteria;Firmicutes;Clostridia;Clostridiales;Lachnospiraceae;Roseburia
OTU0209	0	0	0	0	276	Bacteria;Firmicutes;Clostridia;Clostridiales;Lachnospiraceae;Roseburia
OTU0337	0	0	0	0	118	Bacteria;Firmicutes;Clostridia;Clostridiales;Lachnospiraceae;Roseburia
OTU0601	0	0	0	0	39	Bacteria;Firmicutes;Clostridia;Clostridiales;Lachnospiraceae;Roseburia
OTU0289	0	0	0	0	164	Bacteria;Firmicutes;Clostridia;Clostridiales;NA;NA
OTU0298	0	0	0	0	110	Bacteria;Firmicutes;Clostridia;Clostridiales;NA;NA
OTU1212	0	0	0	0	14	Bacteria;Firmicutes;Clostridia;Clostridiales;NA;NA
OTU0131	0	351	0	0	0	Bacteria;Firmicutes;Clostridia;Clostridiales;Peptostreptococcaceae;Filifactor
OTU0439	160	0	0	0	0	Bacteria;Firmicutes;Clostridia;Clostridiales;Peptostreptococcaceae;NA
OTU0275	104	0	0	0	0	Bacteria;Firmicutes;Clostridia;Clostridiales;Peptostreptococcaceae;NA
OTU0148	0	337	0	0	0	Bacteria;Firmicutes;Clostridia;Clostridiales;Peptostreptococcaceae;Peptostreptococcus
OTU0828	0	0	0	0	0	Bacteria;Firmicutes;Clostridia;Clostridiales;Peptostreptococcaceae;Romboutsia
OTU0563	0	0	0	0	56	Bacteria;Firmicutes;Clostridia;Clostridiales;Ruminococcaceae;Butyricicoccus
OTU0726	0	0	0	0	38	Bacteria;Firmicutes;Clostridia;Clostridiales;Ruminococcaceae;Butyricicoccus
OTU0118	0	0	0	0	631	Bacteria;Firmicutes;Clostridia;Clostridiales;Ruminococcaceae;Caproiciproducens
OTU1170	0	0	0	0	17	Bacteria;Firmicutes;Clostridia;Clostridiales;Ruminococcaceae;Caproiciproducens
OTU0043	0	0	0	0	1770	Bacteria;Firmicutes;Clostridia;Clostridiales;Ruminococcaceae;Faecalibacterium
OTU0139	0	0	0	0	416	Bacteria;Firmicutes;Clostridia;Clostridiales;Ruminococcaceae;Faecalibacterium
OTU0125	0	231	0	0	177	Bacteria;Firmicutes;Clostridia;Clostridiales;Ruminococcaceae;Faecalibacterium
OTU0199	0	0	0	0	270	Bacteria;Firmicutes;Clostridia;Clostridiales;Ruminococcaceae;Faecalibacterium
OTU0414	0	0	0	0	97	Bacteria;Firmicutes;Clostridia;Clostridiales;Ruminococcaceae;Faecalibacterium
OTU0875	0	0	0	0	44	Bacteria;Firmicutes;Clostridia;Clostridiales;Ruminococcaceae;Intestinimonas
OTU0318	0	0	0	0	135	Bacteria;Firmicutes;Clostridia;Clostridiales;Ruminococcaceae;NA
OTU0372	0	0	0	0	115	Bacteria;Firmicutes;Clostridia;Clostridiales;Ruminococcaceae;NA
OTU0548	0	0	0	0	49	Bacteria;Firmicutes;Clostridia;Clostridiales;Ruminococcaceae;NA
OTU1081	0	0	0	0	26	Bacteria;Firmicutes;Clostridia;Clostridiales;Ruminococcaceae;NA
OTU1082	0	0	0	0	26	Bacteria;Firmicutes;Clostridia;Clostridiales;Ruminococcaceae;Oscillibacter
OTU0620	0	0	0	0	42	Bacteria;Firmicutes;Clostridia;Clostridiales;Ruminococcaceae;Ruminiclostridium_5
OTU0703	0	0	0	0	20	Bacteria;Firmicutes;Clostridia;Clostridiales;Ruminococcaceae;Ruminiclostridium_5
OTU1255	0	0	0	0	11	Bacteria;Firmicutes;Clostridia;Clostridiales;Ruminococcaceae;Ruminiclostridium_5
OTU0081	0	0	0	0	819	Bacteria;Firmicutes;Clostridia;Clostridiales;Ruminococcaceae;Ruminiclostridium_6
OTU0593	0	0	0	0	54	Bacteria;Firmicutes;Clostridia;Clostridiales;Ruminococcaceae;Ruminiclostridium_9
OTU0513	0	0	0	0	78	Bacteria;Firmicutes;Clostridia;Clostridiales;Ruminococcaceae;Ruminococcaceae_NK4A214_group
OTU0480	0	0	0	0	77	Bacteria;Firmicutes;Clostridia;Clostridiales;Ruminococcaceae;Ruminococcaceae_NK4A214_group
OTU0456	0	0	0	0	73	Bacteria;Firmicutes;Clostridia;Clostridiales;Ruminococcaceae;Ruminococcaceae_NK4A214_group
OTU0676	0	0	0	0	37	Bacteria;Firmicutes;Clostridia;Clostridiales;Ruminococcaceae;Ruminococcaceae_NK4A214_group
OTU0197	0	0	0	0	277	Bacteria;Firmicutes;Clostridia;Clostridiales;Ruminococcaceae;Ruminococcaceae_UCG-002
OTU0297	0	0	0	0	122	Bacteria;Firmicutes;Clostridia;Clostridiales;Ruminococcaceae;Ruminococcaceae_UCG-002
OTU0433	0	0	0	0	92	Bacteria;Firmicutes;Clostridia;Clostridiales;Ruminococcaceae;Ruminococcaceae_UCG-002
OTU0518	0	63	0	0	0	Bacteria;Firmicutes;Clostridia;Clostridiales;Ruminococcaceae;Ruminococcaceae_UCG-002
OTU1000	0	32	0	0	0	Bacteria;Firmicutes;Clostridia;Clostridiales;Ruminococcaceae;Ruminococcaceae_UCG-002
OTU1156	0	0	0	0	18	Bacteria;Firmicutes;Clostridia;Clostridiales;Ruminococcaceae;Ruminococcaceae_UCG-003
OTU0194	0	0	0	0	285	Bacteria;Firmicutes;Clostridia;Clostridiales;Ruminococcaceae;Ruminococcaceae_UCG-005
OTU1117	0	0	0	0	21	Bacteria;Firmicutes;Clostridia;Clostridiales;Ruminococcaceae;Ruminococcaceae_UCG-005
OTU0458	0	0	0	15	0	Bacteria;Firmicutes;Clostridia;Clostridiales;Ruminococcaceae;Ruminococcaceae_UCG-005
OTU1213	0	0	0	0	14	Bacteria;Firmicutes;Clostridia;Clostridiales;Ruminococcaceae;Ruminococcaceae_UCG-005
OTU0725	0	0	0	0	31	Bacteria;Firmicutes;Clostridia;Clostridiales;Ruminococcaceae;Ruminococcaceae_UCG-007
OTU0671	0	0	0	0	41	Bacteria;Firmicutes;Clostridia;Clostridiales;Ruminococcaceae;Ruminococcaceae_UCG-010
OTU0680	0	0	0	0	37	Bacteria;Firmicutes;Clostridia;Clostridiales;Ruminococcaceae;Ruminococcaceae_UCG-010
OTU1240	0	0	0	0	12	Bacteria;Firmicutes;Clostridia;Clostridiales;Ruminococcaceae;Ruminococcaceae_UCG-010
OTU1337	0	0	0	0	4	Bacteria;Firmicutes;Clostridia;Clostridiales;Ruminococcaceae;Ruminococcaceae_UCG-010
OTU0344	0	0	0	0	124	Bacteria;Firmicutes;Clostridia;Clostridiales;Ruminococcaceae;Ruminococcaceae_UCG-013
OTU0288	0	0	0	0	120	Bacteria;Firmicutes;Clostridia;Clostridiales;Ruminococcaceae;Ruminococcaceae_UCG-014
OTU0387	0	0	0	0	102	Bacteria;Firmicutes;Clostridia;Clostridiales;Ruminococcaceae;Ruminococcaceae_UCG-014
OTU0507	0	0	0	0	61	Bacteria;Firmicutes;Clostridia;Clostridiales;Ruminococcaceae;Ruminococcaceae_UCG-014
OTU0530	0	0	0	0	56	Bacteria;Firmicutes;Clostridia;Clostridiales;Ruminococcaceae;Ruminococcaceae_UCG-014
OTU0484	0	0	0	0	55	Bacteria;Firmicutes;Clostridia;Clostridiales;Ruminococcaceae;Ruminococcaceae_UCG-014
OTU0538	0	0	0	0	43	Bacteria;Firmicutes;Clostridia;Clostridiales;Ruminococcaceae;Ruminococcaceae_UCG-014
OTU0117	0	0	0	0	587	Bacteria;Firmicutes;Clostridia;Clostridiales;Ruminococcaceae;Ruminococcus_1
OTU0245	0	0	0	0	215	Bacteria;Firmicutes;Clostridia;Clostridiales;Ruminococcaceae;Ruminococcus_1
OTU0542	0	0	0	0	58	Bacteria;Firmicutes;Clostridia;Clostridiales;Ruminococcaceae;Ruminococcus_1
OTU0054	0	0	0	0	1576	Bacteria;Firmicutes;Clostridia;Clostridiales;Ruminococcaceae;Subdoligranulum
OTU0162	0	0	0	0	332	Bacteria;Firmicutes;Clostridia;Clostridiales;Ruminococcaceae;Subdoligranulum
OTU0218	0	0	0	0	263	Bacteria;Firmicutes;Clostridia;Clostridiales;Ruminococcaceae;Subdoligranulum
OTU0251	0	0	0	0	198	Bacteria;Firmicutes;Clostridia;Clostridiales;Ruminococcaceae;Subdoligranulum
OTU0559	0	0	0	0	47	Bacteria;Firmicutes;Clostridia;NA;NA;NA
OTU1192	0	0	0	0	15	Bacteria;Firmicutes;Clostridia;NA;NA;NA
OTU1329	0	0	0	0	5	Bacteria;Firmicutes;Erysipelotrichia;Erysipelotrichales;Erysipelotrichaceae;Erysipelatoclostridium
OTU0067	0	0	0	0	1297	Bacteria;Firmicutes;Erysipelotrichia;Erysipelotrichales;Erysipelotrichaceae;Erysipelotrichaceae_UCG-003
OTU0978	0	0	0	0	34	Bacteria;Firmicutes;Erysipelotrichia;Erysipelotrichales;Erysipelotrichaceae;Faecalitalea
OTU1067	0	0	0	0	9	Bacteria;Firmicutes;Erysipelotrichia;Erysipelotrichales;Erysipelotrichaceae;Holdemania
OTU0555	0	0	0	0	49	Bacteria;Firmicutes;Erysipelotrichia;Erysipelotrichales;Erysipelotrichaceae;NA
OTU0928	0	0	0	0	0	Bacteria;Firmicutes;Erysipelotrichia;Erysipelotrichales;Erysipelotrichaceae;Turicibacter
OTU0660	0	0	0	0	34	Bacteria;Firmicutes;Erysipelotrichia;Erysipelotrichales;Erysipelotrichaceae;Turicibacter
OTU1317	0	0	0	0	6	Bacteria;Firmicutes;NA;NA;NA;NA
OTU0783	0	0	0	0	0	Bacteria;Firmicutes;Negativicutes;Selenomonadales;Veillonellaceae;Centipeda
OTU0697	0	0	0	3	0	Bacteria;Firmicutes;Negativicutes;Selenomonadales;Veillonellaceae;Dialister
OTU0196	0	0	0	454	0	Bacteria;Firmicutes;Negativicutes;Selenomonadales;Veillonellaceae;Selenomonas_3
OTU0742	0	59	0	0	0	Bacteria;Firmicutes;Negativicutes;Selenomonadales;Veillonellaceae;Selenomonas_4
OTU0657	0	0	31	47	0	Bacteria;Firmicutes;Negativicutes;Selenomonadales;Veillonellaceae;Veillonella
OTU0016	0	6991	0	0	0	Bacteria;Fusobacteria;Fusobacteriia;Fusobacteriales;Fusobacteriaceae;Fusobacterium
OTU0046	2588	0	0	0	0	Bacteria;Fusobacteria;Fusobacteriia;Fusobacteriales;Fusobacteriaceae;Fusobacterium
OTU0073	549	0	0	1252	0	Bacteria;Fusobacteria;Fusobacteriia;Fusobacteriales;Fusobacteriaceae;Fusobacterium
OTU0095	849	0	0	700	0	Bacteria;Fusobacteria;Fusobacteriia;Fusobacteriales;Leptotrichiaceae;Leptotrichia
OTU0149	432	0	0	0	0	Bacteria;Fusobacteria;Fusobacteriia;Fusobacteriales;Leptotrichiaceae;Leptotrichia
OTU0967	34	0	0	0	0	Bacteria;Fusobacteria;Fusobacteriia;Fusobacteriales;Leptotrichiaceae;Leptotrichia
OTU0332	0	0	0	0	113	Bacteria;Lentisphaerae;Lentisphaeria;Victivallales;Victivallaceae;Victivallis
OTU0694	0	0	0	69	0	Bacteria;NA;NA;NA;NA;NA
OTU0752	0	0	0	0	0	Bacteria;NA;NA;NA;NA;NA
OTU1272	0	0	9	0	0	Bacteria;Omnitrophica;NA;NA;NA;NA
OTU0655	0	0	23	0	0	Bacteria;Planctomycetes;BD7-11;NA;NA;NA
OTU1231	0	0	12	0	0	Bacteria;Planctomycetes;Phycisphaerae;Tepidisphaerales;Tepidisphaeraceae;NA
OTU0802	0	0	0	0	0	Bacteria;Planctomycetes;Planctomycetacia;Planctomycetales;Planctomycetaceae;Gemmata
OTU0066	0	0	0	0	0	Bacteria;Proteobacteria;Alphaproteobacteria;Caulobacterales;Caulobacteraceae;Brevundimonas
OTU0215	0	0	0	0	0	Bacteria;Proteobacteria;Alphaproteobacteria;Caulobacterales;Caulobacteraceae;Brevundimonas
OTU0693	0	0	0	0	0	Bacteria;Proteobacteria;Alphaproteobacteria;Caulobacterales;Caulobacteraceae;Brevundimonas
OTU0798	0	0	12	0	0	Bacteria;Proteobacteria;Alphaproteobacteria;Caulobacterales;Caulobacteraceae;NA
OTU0212	478	0	0	0	0	Bacteria;Proteobacteria;Alphaproteobacteria;Caulobacterales;Caulobacteraceae;Phenylobacterium
OTU0878	0	0	43	0	0	Bacteria;Proteobacteria;Alphaproteobacteria;Caulobacterales;Hyphomonadaceae;Hirschia
OTU1058	0	0	27	0	0	Bacteria;Proteobacteria;Alphaproteobacteria;Caulobacterales;Hyphomonadaceae;Woodsholea
OTU0071	0	0	0	0	0	Bacteria;Proteobacteria;Alphaproteobacteria;Rhizobiales;Aurantimonadaceae;Aureimonas
OTU0377	0	0	69	0	0	Bacteria;Proteobacteria;Alphaproteobacteria;Rhizobiales;Bradyrhizobiaceae;Bradyrhizobium
OTU0443	0	0	0	0	0	Bacteria;Proteobacteria;Alphaproteobacteria;Rhizobiales;Bradyrhizobiaceae;Bradyrhizobium
OTU0483	0	0	37	0	0	Bacteria;Proteobacteria;Alphaproteobacteria;Rhizobiales;Bradyrhizobiaceae;NA
OTU0133	344	412	0	264	0	Bacteria;Proteobacteria;Alphaproteobacteria;Rhizobiales;Brucellaceae;Brucella
OTU0812	0	0	50	0	0	Bacteria;Proteobacteria;Alphaproteobacteria;Rhizobiales;Hyphomicrobiaceae;Devosia
OTU0360	0	0	0	226	0	Bacteria;Proteobacteria;Alphaproteobacteria;Rhizobiales;Methylobacteriaceae;Methylobacterium
OTU0579	0	0	0	0	0	Bacteria;Proteobacteria;Alphaproteobacteria;Rhizobiales;Methylobacteriaceae;Methylobacterium
OTU1119	0	0	20	0	0	Bacteria;Proteobacteria;Alphaproteobacteria;Rhizobiales;Methylobacteriaceae;Methylobacterium
OTU0851	0	0	0	0	0	Bacteria;Proteobacteria;Alphaproteobacteria;Rhizobiales;NA;NA
OTU0569	0	0	0	0	0	Bacteria;Proteobacteria;Alphaproteobacteria;Rhizobiales;Rhizobiaceae;Neorhizobium
OTU0532	0	0	0	0	0	Bacteria;Proteobacteria;Alphaproteobacteria;Rhizobiales;Rhizobiaceae;Rhizobium
OTU0993	0	0	0	0	0	Bacteria;Proteobacteria;Alphaproteobacteria;Rhizobiales;Rhizobiaceae;Shinella
OTU0757	0	0	57	0	0	Bacteria;Proteobacteria;Alphaproteobacteria;Rhizobiales;Xanthobacteraceae;Pseudolabrys
OTU0350	0	0	0	0	0	Bacteria;Proteobacteria;Alphaproteobacteria;Rhodobacterales;Rhodobacteraceae;Amaricoccus
OTU0740	0	0	0	0	0	Bacteria;Proteobacteria;Alphaproteobacteria;Rhodobacterales;Rhodobacteraceae;NA
OTU1078	0	0	0	0	0	Bacteria;Proteobacteria;Alphaproteobacteria;Rhodobacterales;Rhodobacteraceae;NA
OTU0041	0	0	58	834	0	Bacteria;Proteobacteria;Alphaproteobacteria;Rhodobacterales;Rhodobacteraceae;Paracoccus
OTU0048	0	0	0	0	0	Bacteria;Proteobacteria;Alphaproteobacteria;Rhodobacterales;Rhodobacteraceae;Paracoccus
OTU0070	0	0	0	0	0	Bacteria;Proteobacteria;Alphaproteobacteria;Rhodobacterales;Rhodobacteraceae;Paracoccus
OTU0203	0	0	0	0	0	Bacteria;Proteobacteria;Alphaproteobacteria;Rhodobacterales;Rhodobacteraceae;Paracoccus
OTU0250	0	0	236	0	0	Bacteria;Proteobacteria;Alphaproteobacteria;Rhodobacterales;Rhodobacteraceae;Paracoccus
OTU0239	0	0	0	0	0	Bacteria;Proteobacteria;Alphaproteobacteria;Rhodobacterales;Rhodobacteraceae;Paracoccus
OTU0927	0	0	0	0	0	Bacteria;Proteobacteria;Alphaproteobacteria;Rhodobacterales;Rhodobacteraceae;Paracoccus
OTU0321	0	0	0	257	0	Bacteria;Proteobacteria;Alphaproteobacteria;Rhodobacterales;Rhodobacteraceae;Rubellimicrobium
OTU0806	0	0	0	51	0	Bacteria;Proteobacteria;Alphaproteobacteria;Rhodobacterales;Rhodobacteraceae;Rubellimicrobium
OTU0093	0	0	0	0	0	Bacteria;Proteobacteria;Alphaproteobacteria;Rhodospirillales;Acetobacteraceae;Roseomonas
OTU0345	0	0	0	0	0	Bacteria;Proteobacteria;Alphaproteobacteria;Rhodospirillales;Acetobacteraceae;Roseomonas
OTU0610	0	0	0	0	0	Bacteria;Proteobacteria;Alphaproteobacteria;Rhodospirillales;Acetobacteraceae;Roseomonas
OTU1072	0	0	26	0	0	Bacteria;Proteobacteria;Alphaproteobacteria;Rhodospirillales;Acetobacteraceae;Roseomonas
OTU0973	0	0	0	0	0	Bacteria;Proteobacteria;Alphaproteobacteria;Rhodospirillales;Rhodospirillaceae;Azospirillum
OTU0136	0	0	0	0	493	Bacteria;Proteobacteria;Alphaproteobacteria;Rhodospirillales;Rhodospirillaceae;NA
OTU0618	0	0	0	0	31	Bacteria;Proteobacteria;Alphaproteobacteria;Rhodospirillales;Rhodospirillaceae;NA
OTU1149	0	0	18	0	0	Bacteria;Proteobacteria;Alphaproteobacteria;Rhodospirillales;Rhodospirillaceae;Skermanella
OTU0492	0	0	0	0	0	Bacteria;Proteobacteria;Alphaproteobacteria;Rhodospirillales;Rhodospirillales_Incertae_Sedis;Geminicoccus
OTU0141	0	0	0	653	0	Bacteria;Proteobacteria;Alphaproteobacteria;Rickettsiales;Mitochondria;NA
OTU0797	0	0	0	52	0	Bacteria;Proteobacteria;Alphaproteobacteria;Rickettsiales;Mitochondria;NA
OTU0888	0	0	42	0	0	Bacteria;Proteobacteria;Alphaproteobacteria;Rickettsiales;Mitochondria;NA
OTU0879	0	0	43	0	0	Bacteria;Proteobacteria;Alphaproteobacteria;Sphingomonadales;Erythrobacteraceae;Altererythrobacter
OTU1025	0	0	30	0	0	Bacteria;Proteobacteria;Alphaproteobacteria;Sphingomonadales;Erythrobacteraceae;NA
OTU0217	0	0	0	406	0	Bacteria;Proteobacteria;Alphaproteobacteria;Sphingomonadales;Sphingomonadaceae;Sphingomonas
OTU0340	0	0	29	0	0	Bacteria;Proteobacteria;Alphaproteobacteria;Sphingomonadales;Sphingomonadaceae;Sphingomonas
OTU0427	0	0	0	170	0	Bacteria;Proteobacteria;Alphaproteobacteria;Sphingomonadales;Sphingomonadaceae;Sphingomonas
OTU0596	0	0	0	0	0	Bacteria;Proteobacteria;Alphaproteobacteria;Sphingomonadales;Sphingomonadaceae;Sphingomonas
OTU0625	0	0	0	0	0	Bacteria;Proteobacteria;Alphaproteobacteria;Sphingomonadales;Sphingomonadaceae;Sphingomonas
OTU0860	0	0	0	45	0	Bacteria;Proteobacteria;Alphaproteobacteria;Sphingomonadales;Sphingomonadaceae;Sphingomonas
OTU0871	0	0	0	0	0	Bacteria;Proteobacteria;Alphaproteobacteria;Sphingomonadales;Sphingomonadaceae;Sphingomonas
OTU0872	0	0	0	0	0	Bacteria;Proteobacteria;Alphaproteobacteria;Sphingomonadales;Sphingomonadaceae;Sphingomonas
OTU0614	0	0	0	0	0	Bacteria;Proteobacteria;Alphaproteobacteria;Sphingomonadales;Sphingomonadaceae;Zymomonas
OTU0675	0	0	0	0	34	Bacteria;Proteobacteria;Betaproteobacteria;Burkholderiales;Alcaligenaceae;Parasutterella
OTU0079	0	0	0	0	799	Bacteria;Proteobacteria;Betaproteobacteria;Burkholderiales;Alcaligenaceae;Sutterella
OTU0716	0	0	0	0	0	Bacteria;Proteobacteria;Betaproteobacteria;Burkholderiales;Alcaligenaceae;Sutterella
OTU0720	0	0	35	0	0	Bacteria;Proteobacteria;Betaproteobacteria;Burkholderiales;Burkholderiaceae;Burkholderia-Paraburkholderia
OTU0628	0	0	29	0	0	Bacteria;Proteobacteria;Betaproteobacteria;Burkholderiales;Burkholderiaceae;Burkholderia-Paraburkholderia
OTU0058	1834	0	0	0	0	Bacteria;Proteobacteria;Betaproteobacteria;Burkholderiales;Burkholderiaceae;Lautropia
OTU0637	0	0	0	0	0	Bacteria;Proteobacteria;Betaproteobacteria;Burkholderiales;Burkholderiaceae;Lautropia
OTU0597	0	0	0	0	0	Bacteria;Proteobacteria;Betaproteobacteria;Burkholderiales;Comamonadaceae;Comamonas
OTU0311	271	0	0	0	0	Bacteria;Proteobacteria;Betaproteobacteria;Burkholderiales;Comamonadaceae;Diaphorobacter
OTU0516	0	0	0	0	0	Bacteria;Proteobacteria;Betaproteobacteria;Burkholderiales;Comamonadaceae;NA
OTU0301	0	0	30	0	0	Bacteria;Proteobacteria;Betaproteobacteria;Burkholderiales;Comamonadaceae;NA
OTU1004	0	0	32	0	0	Bacteria;Proteobacteria;Betaproteobacteria;Burkholderiales;Comamonadaceae;Piscinibacter
OTU0156	296	0	0	0	0	Bacteria;Proteobacteria;Betaproteobacteria;Burkholderiales;Comamonadaceae;Tepidicella
OTU0584	0	0	8	0	0	Bacteria;Proteobacteria;Betaproteobacteria;Burkholderiales;Comamonadaceae;Tepidimonas
OTU1163	0	0	17	0	0	Bacteria;Proteobacteria;Betaproteobacteria;Burkholderiales;Oxalobacteraceae;Janthinobacterium
OTU0450	0	0	90	0	0	Bacteria;Proteobacteria;Betaproteobacteria;Burkholderiales;Oxalobacteraceae;Massilia
OTU0464	0	0	0	0	0	Bacteria;Proteobacteria;Betaproteobacteria;Burkholderiales;Oxalobacteraceae;Massilia
OTU0445	0	0	0	0	0	Bacteria;Proteobacteria;Betaproteobacteria;Burkholderiales;Oxalobacteraceae;Massilia
OTU1037	0	0	29	0	0	Bacteria;Proteobacteria;Betaproteobacteria;Burkholderiales;Oxalobacteraceae;Massilia
OTU0867	0	0	44	0	0	Bacteria;Proteobacteria;Betaproteobacteria;Burkholderiales;Oxalobacteraceae;NA
OTU0844	0	0	0	0	19	Bacteria;Proteobacteria;Betaproteobacteria;Burkholderiales;Oxalobacteraceae;Oxalobacter
OTU1266	0	0	10	0	0	Bacteria;Proteobacteria;Betaproteobacteria;Hydrogenophilales;Hydrogenophilaceae;Hydrogenophilus
OTU0789	0	0	52	0	0	Bacteria;Proteobacteria;Betaproteobacteria;Methylophilales;Methylophilaceae;Methylophilus
OTU0097	855	0	0	142	0	Bacteria;Proteobacteria;Betaproteobacteria;Neisseriales;Neisseriaceae;Kingella
OTU0527	116	0	0	0	0	Bacteria;Proteobacteria;Betaproteobacteria;Neisseriales;Neisseriaceae;Kingella
OTU0950	0	0	36	0	0	Bacteria;Proteobacteria;Betaproteobacteria;Neisseriales;Neisseriaceae;NA
OTU0030	2202	0	0	1115	0	Bacteria;Proteobacteria;Betaproteobacteria;Neisseriales;Neisseriaceae;Neisseria
OTU0090	0	0	39	1523	0	Bacteria;Proteobacteria;Betaproteobacteria;Neisseriales;Neisseriaceae;Neisseria
OTU0515	0	0	50	0	0	Bacteria;Proteobacteria;Betaproteobacteria;Neisseriales;Neisseriaceae;Vogesella
OTU1103	0	0	23	0	0	Bacteria;Proteobacteria;Betaproteobacteria;Nitrosomonadales;Gallionellaceae;NA
OTU0546	0	0	0	0	0	Bacteria;Proteobacteria;Betaproteobacteria;Rhodocyclales;Rhodocyclaceae;Dechloromonas
OTU0407	0	0	0	0	18	Bacteria;Proteobacteria;Deltaproteobacteria;Desulfovibrionales;Desulfovibrionaceae;Bilophila
OTU0539	0	0	0	0	0	Bacteria;Proteobacteria;Deltaproteobacteria;Desulfurellales;Desulfurellaceae;H16
OTU0914	0	0	39	0	0	Bacteria;Proteobacteria;Deltaproteobacteria;Desulfurellales;Desulfurellaceae;H16
OTU1098	0	0	0	0	0	Bacteria;Proteobacteria;Deltaproteobacteria;Myxococcales;Archangiaceae;Melittangium
OTU1182	0	0	15	0	0	Bacteria;Proteobacteria;Deltaproteobacteria;Oligoflexales;0319-6G20;NA
OTU0164	0	0	0	753	0	Bacteria;Proteobacteria;Epsilonproteobacteria;Campylobacterales;Campylobacteraceae;Campylobacter
OTU0226	0	0	0	463	0	Bacteria;Proteobacteria;Epsilonproteobacteria;Campylobacterales;Campylobacteraceae;Sulfurospirillum
OTU0639	0	0	17	0	0	Bacteria;Proteobacteria;Gammaproteobacteria;Enterobacteriales;Enterobacteriaceae;Citrobacter
OTU0104	0	0	0	434	0	Bacteria;Proteobacteria;Gammaproteobacteria;Enterobacteriales;Enterobacteriaceae;NA
OTU0524	0	0	39	0	0	Bacteria;Proteobacteria;Gammaproteobacteria;Enterobacteriales;Enterobacteriaceae;Pantoea
OTU1104	0	0	23	0	0	Bacteria;Proteobacteria;Gammaproteobacteria;Enterobacteriales;Enterobacteriaceae;Providencia
OTU0773	0	0	0	0	0	Bacteria;Proteobacteria;Gammaproteobacteria;Enterobacteriales;Enterobacteriaceae;Serratia
OTU1247	0	0	11	0	0	Bacteria;Proteobacteria;Gammaproteobacteria;Legionellales;Legionellaceae;Legionella
OTU0920	0	0	38	0	0	Bacteria;Proteobacteria;Gammaproteobacteria;Oceanospirillales;Saccharospirillaceae;Saccharospirillum
OTU0609	19	0	19	0	0	Bacteria;Proteobacteria;Gammaproteobacteria;Pasteurellales;Pasteurellaceae;Actinobacillus
OTU0577	98	0	0	0	0	Bacteria;Proteobacteria;Gammaproteobacteria;Pasteurellales;Pasteurellaceae;Aggregatibacter
OTU0026	3564	0	18	527	0	Bacteria;Proteobacteria;Gammaproteobacteria;Pasteurellales;Pasteurellaceae;Haemophilus
OTU0044	1868	0	0	0	0	Bacteria;Proteobacteria;Gammaproteobacteria;Pasteurellales;Pasteurellaceae;Haemophilus
OTU0247	0	0	0	368	0	Bacteria;Proteobacteria;Gammaproteobacteria;Pasteurellales;Pasteurellaceae;Haemophilus
OTU1123	0	0	0	20	0	Bacteria;Proteobacteria;Gammaproteobacteria;Pasteurellales;Pasteurellaceae;Haemophilus
OTU0304	0	0	0	281	0	Bacteria;Proteobacteria;Gammaproteobacteria;Pasteurellales;Pasteurellaceae;NA
OTU0144	0	0	67	657	0	Bacteria;Proteobacteria;Gammaproteobacteria;Pseudomonadales;Moraxellaceae;Acinetobacter
OTU0190	0	0	0	0	0	Bacteria;Proteobacteria;Gammaproteobacteria;Pseudomonadales;Moraxellaceae;Acinetobacter
OTU0307	0	0	129	0	0	Bacteria;Proteobacteria;Gammaproteobacteria;Pseudomonadales;Moraxellaceae;Acinetobacter
OTU0432	0	0	49	0	0	Bacteria;Proteobacteria;Gammaproteobacteria;Pseudomonadales;Moraxellaceae;Acinetobacter
OTU0013	0	0	53	3862	0	Bacteria;Proteobacteria;Gammaproteobacteria;Pseudomonadales;Moraxellaceae;Enhydrobacter
OTU0673	0	0	0	74	0	Bacteria;Proteobacteria;Gammaproteobacteria;Pseudomonadales;Moraxellaceae;Enhydrobacter
OTU1071	0	0	26	0	0	Bacteria;Proteobacteria;Gammaproteobacteria;Pseudomonadales;Moraxellaceae;Perlucidibaca
OTU1003	0	0	32	0	0	Bacteria;Proteobacteria;Gammaproteobacteria;Pseudomonadales;Moraxellaceae;Psychrobacter
OTU0712	0	0	0	0	0	Bacteria;Proteobacteria;Gammaproteobacteria;Pseudomonadales;Pseudomonadaceae;Azomonas
OTU0290	0	0	0	0	0	Bacteria;Proteobacteria;Gammaproteobacteria;Pseudomonadales;Pseudomonadaceae;Pseudomonas
OTU0522	0	0	0	119	0	Bacteria;Proteobacteria;Gammaproteobacteria;Pseudomonadales;Pseudomonadaceae;Pseudomonas
OTU0640	0	82	0	0	0	Bacteria;Proteobacteria;Gammaproteobacteria;Pseudomonadales;Pseudomonadaceae;Pseudomonas
OTU0909	0	0	0	0	0	Bacteria;Proteobacteria;Gammaproteobacteria;Pseudomonadales;Pseudomonadaceae;Pseudomonas
OTU0652	0	0	0	0	0	Bacteria;Proteobacteria;Gammaproteobacteria;Pseudomonadales;Pseudomonadaceae;Pseudomonas
OTU1047	0	0	28	0	0	Bacteria;Proteobacteria;Gammaproteobacteria;Pseudomonadales;Pseudomonadaceae;Pseudomonas
OTU0629	0	0	55	0	0	Bacteria;Proteobacteria;Gammaproteobacteria;Xanthomonadales;Xanthomonadaceae;Luteibacter
OTU1175	0	0	16	0	0	Bacteria;Proteobacteria;Gammaproteobacteria;Xanthomonadales;Xanthomonadaceae;Lysobacter
OTU0055	0	0	0	0	0	Bacteria;Proteobacteria;Gammaproteobacteria;Xanthomonadales;Xanthomonadaceae;Pseudoxanthomonas
OTU1122	0	0	0	0	0	Bacteria;Proteobacteria;Gammaproteobacteria;Xanthomonadales;Xanthomonadaceae;Pseudoxanthomonas
OTU0873	0	0	0	0	0	Bacteria;Proteobacteria;Gammaproteobacteria;Xanthomonadales;Xanthomonadaceae;Rehaibacterium
OTU0910	0	0	0	0	0	Bacteria;Proteobacteria;Gammaproteobacteria;Xanthomonadales;Xanthomonadaceae;Rhodanobacter
OTU0575	0	0	0	99	0	Bacteria;Saccharibacteria;NA;NA;NA;NA
OTU0846	46	0	0	0	0	Bacteria;Saccharibacteria;NA;NA;NA;NA
OTU1135	0	0	0	0	0	Bacteria;Saccharibacteria;NA;NA;NA;NA
OTU1073	0	0	26	0	0	Bacteria;Spirochaetae;Spirochaetes;Spirochaetales;Spirochaetaceae;Treponema_2
OTU0624	0	86	0	0	0	Bacteria;Synergistetes;Synergistia;Synergistales;Synergistaceae;Pyramidobacter
OTU0818	0	49	0	0	0	Bacteria;Synergistetes;Synergistia;Synergistales;Synergistaceae;Pyramidobacter
OTU0077	0	0	0	0	958	Bacteria;Tenericutes;Mollicutes;Mollicutes_RF9;NA;NA
OTU0998	0	0	0	0	33	Bacteria;Tenericutes;Mollicutes;Mollicutes_RF9;NA;NA
OTU0281	0	0	0	0	142	Bacteria;Tenericutes;Mollicutes;NB1-n;NA;NA
OTU1131	0	0	19	0	0	Bacteria;Verrucomicrobia;Opitutae;Opitutales;Opitutaceae;Opitutus
OTU1319	5	0	0	0	0	Bacteria;Verrucomicrobia;Opitutae;Opitutales;Opitutaceae;Opitutus
OTU0774	0	0	54	0	0	Bacteria;Verrucomicrobia;Spartobacteria;Chthoniobacterales;Xiphinematobacteraceae;Candidatus_Xiphinematobacter
OTU1199	0	0	14	0	0	Bacteria;Verrucomicrobia;Verrucomicrobiae;Verrucomicrobiales;Verrucomicrobiaceae;Luteolibacter
OTU1232	0	0	12	0	0	Bacteria;Verrucomicrobia;Verrucomicrobiae;Verrucomicrobiales;Verrucomicrobiaceae;Luteolibacter
OTU1183	0	0	15	0	0	Bacteria;Verrucomicrobia;Verrucomicrobiae;Verrucomicrobiales;Verrucomicrobiaceae;Verrucomicrobium
OTU0448	0	9	6	0	0	Eukaryota;Euglenozoa;Euglenida;Aphagea;Aphagea_fa;Distigma
OTU0087	0	1106	0	0	0	Eukaryota;NA;NA;NA;NA;NA
OTU0534	0	112	0	0	0	Eukaryota;NA;NA;NA;NA;NA
OTU0704	0	66	0	0	0	Eukaryota;NA;NA;NA;NA;NA
OTU0809	0	50	0	0	0	Eukaryota;NA;NA;NA;NA;NA
OTU0877	0	43	0	0	0	Eukaryota;NA;NA;NA;NA;NA
OTU1084	0	25	0	0	0	Eukaryota;NA;NA;NA;NA;NA
OTU1085	0	25	0	0	0	Eukaryota;NA;NA;NA;NA;NA
OTU1171	0	16	0	0	0	Eukaryota;NA;NA;NA;NA;NA
OTU1216	0	13	0	0	0	Eukaryota;NA;NA;NA;NA;NA
OTU1259	0	10	0	0	0	Eukaryota;NA;NA;NA;NA;NA
OTU1284	0	8	0	0	0	Eukaryota;NA;NA;NA;NA;NA
OTU1301	0	7	0	0	0	Eukaryota;NA;NA;NA;NA;NA
OTU0715	0	0	6	0	0	Eukaryota;NA;NA;NA;NA;NA
OTU0295	0	0	0	296	0	NA;NA;NA;NA;NA;NA
OTU0412	0	184	0	0	0	NA;NA;NA;NA;NA;NA
OTU0478	0	0	0	141	0	NA;NA;NA;NA;NA;NA
OTU0778	0	53	0	0	0	NA;NA;NA;NA;NA;NA
OTU0895	0	41	0	0	0	NA;NA;NA;NA;NA;NA
OTU1143	0	18	0	0	0	NA;NA;NA;NA;NA;NA
OTU1315	0	0	0	6	0	NA;NA;NA;NA;NA;NA

## Sheet: biom_PCR10
Supplementary table 1f - biom table obtained after DADA2 analysis from the primer pair 519F-806R
#OTU ID	oral-10	appendix-10	nose-10	skin-10	stool-10	taxonomy
OTU0096	0	0	0	0	270	Archaea;Euryarchaeota;Methanobacteria;Methanobacteriales;Methanobacteriaceae;Methanobrevibacter
OTU0333	0	0	0	0	0	Archaea;Euryarchaeota;Methanobacteria;Methanobacteriales;Methanobacteriaceae;Methanobrevibacter
OTU0243	0	0	0	0	420	Archaea;Euryarchaeota;Methanobacteria;Methanobacteriales;Methanobacteriaceae;Methanosphaera
OTU1109	22	0	0	0	0	Archaea;Thaumarchaeota;South_African_Gold_Mine_Gp_1(SAGMCG-1);NA;NA;NA
OTU0207	0	0	0	0	0	Bacteria;Acidobacteria;Blastocatellia;Blastocatellales;Blastocatellaceae_(Subgroup_4);NA
OTU0324	0	0	254	0	0	Bacteria;Acidobacteria;Subgroup_6;NA;NA;NA
OTU0348	0	0	235	0	0	Bacteria;Acidobacteria;Subgroup_6;NA;NA;NA
OTU0361	0	0	225	0	0	Bacteria;Acidobacteria;Subgroup_6;Unknown_Order;Unknown_Family;Vicinamibacter
OTU0472	0	0	144	0	0	Bacteria;Acidobacteria;Subgroup_6;Unknown_Order;Unknown_Family;Vicinamibacter
OTU0603	0	0	92	0	0	Bacteria;Acidobacteria;Subgroup_6;Unknown_Order;Unknown_Family;Vicinamibacter
OTU0294	104	0	58	136	0	Bacteria;Actinobacteria;Actinobacteria;Actinomycetales;Actinomycetaceae;Actinomyces
OTU0714	0	0	0	3	0	Bacteria;Actinobacteria;Actinobacteria;Actinomycetales;Actinomycetaceae;Actinomyces
OTU0753	0	0	0	58	0	Bacteria;Actinobacteria;Actinobacteria;Actinomycetales;Actinomycetaceae;Actinomyces
OTU1090	0	0	0	0	0	Bacteria;Actinobacteria;Actinobacteria;Bifidobacteriales;Bifidobacteriaceae;Bifidobacterium
OTU0063	0	0	0	2471	0	Bacteria;Actinobacteria;Actinobacteria;Corynebacteriales;Corynebacteriaceae;Corynebacterium_1
OTU0240	0	0	0	0	0	Bacteria;Actinobacteria;Actinobacteria;Corynebacteriales;Corynebacteriaceae;Corynebacterium_1
OTU0296	0	0	0	0	0	Bacteria;Actinobacteria;Actinobacteria;Corynebacteriales;Corynebacteriaceae;Corynebacterium_1
OTU0302	0	0	0	283	0	Bacteria;Actinobacteria;Actinobacteria;Corynebacteriales;Corynebacteriaceae;Corynebacterium_1
OTU0354	0	0	0	0	0	Bacteria;Actinobacteria;Actinobacteria;Corynebacteriales;Corynebacteriaceae;Corynebacterium_1
OTU0382	0	0	208	0	0	Bacteria;Actinobacteria;Actinobacteria;Corynebacteriales;Corynebacteriaceae;Corynebacterium_1
OTU0617	0	0	87	0	0	Bacteria;Actinobacteria;Actinobacteria;Corynebacteriales;Corynebacteriaceae;Corynebacterium_1
OTU0760	0	0	0	0	0	Bacteria;Actinobacteria;Actinobacteria;Corynebacteriales;Corynebacteriaceae;Corynebacterium_1
OTU0384	0	0	0	0	0	Bacteria;Actinobacteria;Actinobacteria;Corynebacteriales;Nocardiaceae;Rhodococcus
OTU1207	0	0	0	14	0	Bacteria;Actinobacteria;Actinobacteria;Corynebacteriales;Nocardiaceae;Rhodococcus
OTU1052	0	0	0	0	0	Bacteria;Actinobacteria;Actinobacteria;Kineosporiales;Kineosporiaceae;Kineosporia
OTU0103	0	0	0	0	0	Bacteria;Actinobacteria;Actinobacteria;Micrococcales;Brevibacteriaceae;Brevibacterium
OTU0272	0	0	0	0	0	Bacteria;Actinobacteria;Actinobacteria;Micrococcales;Brevibacteriaceae;Brevibacterium
OTU0413	0	0	0	0	0	Bacteria;Actinobacteria;Actinobacteria;Micrococcales;Brevibacteriaceae;Brevibacterium
OTU1106	0	0	23	0	0	Bacteria;Actinobacteria;Actinobacteria;Micrococcales;Cellulomonadaceae;NA
OTU1206	0	0	0	0	0	Bacteria;Actinobacteria;Actinobacteria;Micrococcales;Dermacoccaceae;Demetria
OTU1165	0	0	17	0	0	Bacteria;Actinobacteria;Actinobacteria;Micrococcales;Dermatophilaceae;NA
OTU0747	58	0	0	0	0	Bacteria;Actinobacteria;Actinobacteria;Micrococcales;Microbacteriaceae;Leucobacter
OTU0453	0	0	0	0	0	Bacteria;Actinobacteria;Actinobacteria;Micrococcales;Microbacteriaceae;Zimmermannella
OTU0282	0	0	0	314	0	Bacteria;Actinobacteria;Actinobacteria;Micrococcales;Micrococcaceae;Kocuria
OTU0224	0	0	0	0	0	Bacteria;Actinobacteria;Actinobacteria;Micrococcales;Micrococcaceae;Kocuria
OTU0189	0	0	0	619	0	Bacteria;Actinobacteria;Actinobacteria;Propionibacteriales;Nocardioidaceae;Kribbella
OTU0677	0	0	0	73	0	Bacteria;Actinobacteria;Actinobacteria;Propionibacteriales;Nocardioidaceae;Nocardioides
OTU0941	0	0	0	0	0	Bacteria;Actinobacteria;Actinobacteria;Propionibacteriales;Nocardioidaceae;Nocardioides
OTU0429	0	0	0	0	0	Bacteria;Actinobacteria;Actinobacteria;Propionibacteriales;Propionibacteriaceae;Propionibacterium
OTU0502	0	0	0	0	129	Bacteria;Actinobacteria;Coriobacteriia;Coriobacteriales;Coriobacteriaceae;Adlercreutzia
OTU1118	0	0	0	0	21	Bacteria;Actinobacteria;Coriobacteriia;Coriobacteriales;Coriobacteriaceae;Senegalimassilia
OTU1226	0	0	0	0	13	Bacteria;Actinobacteria;Coriobacteriia;Coriobacteriales;Coriobacteriaceae;Senegalimassilia
OTU0571	0	0	0	100	0	Bacteria;Actinobacteria;Rubrobacteria;Rubrobacterales;Rubrobacteriaceae;Rubrobacter
OTU0581	0	0	0	98	0	Bacteria;Actinobacteria;Rubrobacteria;Rubrobacterales;Rubrobacteriaceae;Rubrobacter
OTU1009	0	0	0	0	0	Bacteria;Armatimonadetes;Armatimonadia;Armatimonadales;NA;NA
OTU0964	0	0	0	0	0	Bacteria;Bacteroidetes;Bacteroidetes_Incertae_Sedis;Order_II;Rhodothermaceae;Rubrivirga
OTU0142	0	0	0	540	403	Bacteria;Bacteroidetes;Bacteroidia;Bacteroidales;Bacteroidaceae;Bacteroides
OTU0147	0	0	0	202	0	Bacteria;Bacteroidetes;Bacteroidia;Bacteroidales;Bacteroidaceae;Bacteroides
OTU0175	0	0	0	0	0	Bacteria;Bacteroidetes;Bacteroidia;Bacteroidales;Bacteroidaceae;Bacteroides
OTU0291	0	0	0	303	0	Bacteria;Bacteroidetes;Bacteroidia;Bacteroidales;Bacteroidaceae;Bacteroides
OTU0086	19	0	0	0	0	Bacteria;Bacteroidetes;Bacteroidia;Bacteroidales;Bacteroidaceae;Bacteroides
OTU1214	0	0	0	0	14	Bacteria;Bacteroidetes;Bacteroidia;Bacteroidales;Bacteroidaceae;Bacteroides
OTU0378	0	0	12	0	0	Bacteria;Bacteroidetes;Bacteroidia;Bacteroidales;Bacteroidaceae;Bacteroides
OTU0576	0	0	0	99	0	Bacteria;Bacteroidetes;Bacteroidia;Bacteroidales;Bacteroidales_S24-7_group;NA
OTU0661	16	23	17	0	0	Bacteria;Bacteroidetes;Bacteroidia;Bacteroidales;Bacteroidales_S24-7_group;NA
OTU0746	0	0	0	0	59	Bacteria;Bacteroidetes;Bacteroidia;Bacteroidales;Bacteroidales_S24-7_group;NA
OTU1346	0	0	0	0	2	Bacteria;Bacteroidetes;Bacteroidia;Bacteroidales;Bacteroidales_S24-7_group;NA
OTU0894	0	0	0	0	42	Bacteria;Bacteroidetes;Bacteroidia;Bacteroidales;Porphyromonadaceae;Butyricimonas
OTU1345	0	0	0	0	0	Bacteria;Bacteroidetes;Bacteroidia;Bacteroidales;Porphyromonadaceae;Butyricimonas
OTU1312	0	0	0	0	7	Bacteria;Bacteroidetes;Bacteroidia;Bacteroidales;Porphyromonadaceae;NA
OTU0737	0	0	0	0	61	Bacteria;Bacteroidetes;Bacteroidia;Bacteroidales;Porphyromonadaceae;Odoribacter
OTU0727	62	0	0	0	0	Bacteria;Bacteroidetes;Bacteroidia;Bacteroidales;Porphyromonadaceae;Porphyromonas
OTU0488	0	0	0	0	0	Bacteria;Bacteroidetes;Bacteroidia;Bacteroidales;Porphyromonadaceae;Proteiniphilum
OTU1282	8	0	0	0	0	Bacteria;Bacteroidetes;Bacteroidia;Bacteroidales;Prevotellaceae;Alloprevotella
OTU0246	0	0	0	0	419	Bacteria;Bacteroidetes;Bacteroidia;Bacteroidales;Prevotellaceae;NA
OTU0171	0	0	0	709	0	Bacteria;Bacteroidetes;Bacteroidia;Bacteroidales;Rikenellaceae;Alistipes
OTU1288	0	0	8	0	0	Bacteria;Bacteroidetes;Cytophagia;Cytophagales;Cyclobacteriaceae;Algoriphagus
OTU1333	0	0	4	0	0	Bacteria;Bacteroidetes;Cytophagia;Cytophagales;Cytophagaceae;Cytophaga
OTU0174	0	0	0	694	0	Bacteria;Bacteroidetes;Cytophagia;Cytophagales;Cytophagaceae;Hymenobacter
OTU0186	0	0	0	0	0	Bacteria;Bacteroidetes;Cytophagia;Cytophagales;Cytophagaceae;Hymenobacter
OTU0408	0	0	0	186	0	Bacteria;Bacteroidetes;Cytophagia;Cytophagales;Cytophagaceae;Hymenobacter
OTU0091	1596	0	0	0	0	Bacteria;Bacteroidetes;Flavobacteriia;Flavobacteriales;Flavobacteriaceae;Capnocytophaga
OTU0170	710	0	0	0	0	Bacteria;Bacteroidetes;Flavobacteriia;Flavobacteriales;Flavobacteriaceae;Capnocytophaga
OTU0280	318	0	0	0	0	Bacteria;Bacteroidetes;Flavobacteriia;Flavobacteriales;Flavobacteriaceae;Capnocytophaga
OTU0654	78	0	0	0	0	Bacteria;Bacteroidetes;Flavobacteriia;Flavobacteriales;Flavobacteriaceae;Capnocytophaga
OTU0684	70	0	0	0	0	Bacteria;Bacteroidetes;Flavobacteriia;Flavobacteriales;Flavobacteriaceae;Capnocytophaga
OTU0611	0	0	0	0	0	Bacteria;Bacteroidetes;Flavobacteriia;Flavobacteriales;Flavobacteriaceae;Epilithonimonas
OTU1323	0	0	5	0	0	Bacteria;Bacteroidetes;Flavobacteriia;Flavobacteriales;Flavobacteriaceae;Flavobacterium
OTU1202	0	0	14	0	0	Bacteria;Bacteroidetes;Sphingobacteriia;Sphingobacteriales;Chitinophagaceae;NA
OTU0179	0	0	0	667	0	Bacteria;Bacteroidetes;Sphingobacteriia;Sphingobacteriales;Chitinophagaceae;Sediminibacterium
OTU0658	0	0	77	0	0	Bacteria;Bacteroidetes;Sphingobacteriia;Sphingobacteriales;Chitinophagaceae;Sediminibacterium
OTU1079	0	0	0	0	0	Bacteria;Bacteroidetes;Sphingobacteriia;Sphingobacteriales;Chitinophagaceae;Sediminibacterium
OTU0496	0	130	0	0	0	Bacteria;Bacteroidetes;Sphingobacteriia;Sphingobacteriales;env.OPS_17;NA
OTU1286	0	0	8	0	0	Bacteria;Bacteroidetes;Sphingobacteriia;Sphingobacteriales;env.OPS_17;NA
OTU1027	0	0	30	0	0	Bacteria;Bacteroidetes;Sphingobacteriia;Sphingobacteriales;Sphingobacteriaceae;Pedobacter
OTU0505	0	0	0	0	0	Bacteria;Chloroflexi;Ktedonobacteria;C0119;NA;NA
OTU0615	0	0	0	0	0	Bacteria;Chloroflexi;Thermomicrobia;JG30-KF-CM45;NA;NA
OTU0916	0	0	0	0	0	Bacteria;Chloroflexi;Thermomicrobia;JG30-KF-CM45;NA;NA
OTU0393	0	0	199	0	0	Bacteria;Chloroflexi;TK10;NA;NA;NA
OTU0383	0	0	205	0	0	Bacteria;Cyanobacteria;Cyanobacteria;SubsectionI;FamilyI;Synechococcus
OTU0438	0	0	161	0	0	Bacteria;Cyanobacteria;Cyanobacteria;SubsectionI;FamilyI;Synechococcus
OTU0921	0	0	38	0	0	Bacteria;Cyanobacteria;Cyanobacteria;SubsectionI;FamilyI;Synechococcus
OTU0917	0	0	0	0	39	Bacteria;Cyanobacteria;Melainabacteria;Gastranaerophilales;NA;NA
OTU0184	0	0	0	0	0	Bacteria;Deinococcus-Thermus;Deinococci;Deinococcales;Deinococcaceae;Deinococcus
OTU0233	0	0	0	0	0	Bacteria;Deinococcus-Thermus;Deinococci;Deinococcales;Deinococcaceae;Deinococcus
OTU0369	0	0	217	0	0	Bacteria;Deinococcus-Thermus;Deinococci;Deinococcales;Trueperaceae;Truepera
OTU1020	0	0	31	0	0	Bacteria;FBP;NA;NA;NA;NA
OTU1176	0	0	0	0	0	Bacteria;Firmicutes;Bacilli;Bacillales;Bacillaceae;Bacillus
OTU0834	0	0	47	0	0	Bacteria;Firmicutes;Bacilli;Bacillales;Bacillaceae;NA
OTU0137	0	0	0	0	0	Bacteria;Firmicutes;Bacilli;Bacillales;Family_XI;Gemella
OTU0805	0	0	0	0	0	Bacteria;Firmicutes;Bacilli;Bacillales;Family_XI;Gemella
OTU1249	0	0	11	0	0	Bacteria;Firmicutes;Bacilli;Bacillales;Paenibacillaceae;Paenibacillus
OTU0706	0	0	0	0	0	Bacteria;Firmicutes;Bacilli;Bacillales;Planococcaceae;NA
OTU0106	0	0	1044	120	0	Bacteria;Firmicutes;Bacilli;Bacillales;Staphylococcaceae;Staphylococcus
OTU0573	0	0	6	0	0	Bacteria;Firmicutes;Bacilli;Lactobacillales;Aerococcaceae;Aerococcus
OTU0112	0	0	0	0	0	Bacteria;Firmicutes;Bacilli;Lactobacillales;Carnobacteriaceae;Alkalibacterium
OTU0315	0	0	0	0	0	Bacteria;Firmicutes;Bacilli;Lactobacillales;Carnobacteriaceae;Atopostipes
OTU0257	0	0	0	0	0	Bacteria;Firmicutes;Bacilli;Lactobacillales;Lactobacillaceae;Lactobacillus
OTU0402	194	0	0	0	0	Bacteria;Firmicutes;Bacilli;Lactobacillales;Lactobacillaceae;Lactobacillus
OTU1205	0	0	0	0	0	Bacteria;Firmicutes;Bacilli;Lactobacillales;Lactobacillaceae;Lactobacillus
OTU0986	0	0	33	0	0	Bacteria;Firmicutes;Bacilli;Lactobacillales;Streptococcaceae;Lactococcus
OTU0418	180	0	0	0	0	Bacteria;Firmicutes;Bacilli;Lactobacillales;Streptococcaceae;Streptococcus
OTU0447	0	0	0	157	0	Bacteria;Firmicutes;Bacilli;Lactobacillales;Streptococcaceae;Streptococcus
OTU0955	0	0	0	0	0	Bacteria;Firmicutes;Bacilli;Lactobacillales;Streptococcaceae;Streptococcus
OTU1305	0	0	7	0	0	Bacteria;Firmicutes;Bacilli;Lactobacillales;Streptococcaceae;Streptococcus
OTU0957	10	11	0	0	0	Bacteria;Firmicutes;Clostridia;Clostridiales;Christensenellaceae;Christensenellaceae_R-7_group
OTU1257	0	0	0	0	11	Bacteria;Firmicutes;Clostridia;Clostridiales;Christensenellaceae;Christensenellaceae_R-7_group
OTU0554	0	0	0	0	0	Bacteria;Firmicutes;Clostridia;Clostridiales;Clostridiaceae_1;Clostridium_sensu_stricto_18
OTU1330	0	4	0	0	0	Bacteria;Firmicutes;Clostridia;Clostridiales;Defluviitaleaceae;Defluviitaleaceae_UCG-011
OTU1338	3	0	0	0	0	Bacteria;Firmicutes;Clostridia;Clostridiales;Lachnospiraceae;Coprococcus_2
OTU0886	0	0	0	0	43	Bacteria;Firmicutes;Clostridia;Clostridiales;Lachnospiraceae;Dorea
OTU0787	0	52	0	0	0	Bacteria;Firmicutes;Clostridia;Clostridiales;Lachnospiraceae;Howardella
OTU0113	10	0	0	0	0	Bacteria;Firmicutes;Clostridia;Clostridiales;Lachnospiraceae;Lachnospira
OTU1141	0	0	0	0	19	Bacteria;Firmicutes;Clostridia;Clostridiales;Lachnospiraceae;Lachnospiraceae_FCS020_group
OTU0691	0	69	0	0	0	Bacteria;Firmicutes;Clostridia;Clostridiales;Lachnospiraceae;Lachnospiraceae_NK4A136_group
OTU0807	0	0	0	0	51	Bacteria;Firmicutes;Clostridia;Clostridiales;Lachnospiraceae;Marvinbryantia
OTU1242	0	0	0	0	12	Bacteria;Firmicutes;Clostridia;Clostridiales;Lachnospiraceae;Marvinbryantia
OTU0913	0	0	0	0	40	Bacteria;Firmicutes;Clostridia;Clostridiales;Lachnospiraceae;NA
OTU0424	0	0	0	0	175	Bacteria;Firmicutes;Clostridia;Clostridiales;Lachnospiraceae;Roseburia
OTU0863	0	0	0	0	45	Bacteria;Firmicutes;Clostridia;Clostridiales;NA;NA
OTU1044	0	0	0	0	29	Bacteria;Firmicutes;Clostridia;Clostridiales;Peptococcaceae;Dehalobacterium
OTU1241	0	0	0	0	12	Bacteria;Firmicutes;Clostridia;Clostridiales;Peptococcaceae;NA
OTU1280	0	0	0	0	9	Bacteria;Firmicutes;Clostridia;Clostridiales;Peptococcaceae;NA
OTU0813	0	0	50	0	0	Bacteria;Firmicutes;Clostridia;Clostridiales;Peptostreptococcaceae;Paeniclostridium
OTU0754	0	0	0	0	58	Bacteria;Firmicutes;Clostridia;Clostridiales;Ruminococcaceae;Acetanaerobacterium
OTU0775	0	0	7	0	0	Bacteria;Firmicutes;Clostridia;Clostridiales;Ruminococcaceae;Anaerotruncus
OTU0563	0	0	2	0	0	Bacteria;Firmicutes;Clostridia;Clostridiales;Ruminococcaceae;Butyricicoccus
OTU1043	0	0	0	0	29	Bacteria;Firmicutes;Clostridia;Clostridiales;Ruminococcaceae;NA
OTU1281	0	0	0	0	9	Bacteria;Firmicutes;Clostridia;Clostridiales;Ruminococcaceae;NA
OTU1142	0	0	0	0	19	Bacteria;Firmicutes;Clostridia;Clostridiales;Ruminococcaceae;Oscillibacter
OTU1256	0	0	0	0	11	Bacteria;Firmicutes;Clostridia;Clostridiales;Ruminococcaceae;Oscillibacter
OTU1243	0	0	0	0	12	Bacteria;Firmicutes;Clostridia;Clostridiales;Ruminococcaceae;Ruminiclostridium
OTU1014	0	0	0	0	32	Bacteria;Firmicutes;Clostridia;Clostridiales;Ruminococcaceae;Ruminiclostridium_5
OTU1318	0	0	0	0	6	Bacteria;Firmicutes;Clostridia;Clostridiales;Ruminococcaceae;Ruminiclostridium_9
OTU0862	0	0	0	0	45	Bacteria;Firmicutes;Clostridia;Clostridiales;Ruminococcaceae;Ruminococcaceae_NK4A214_group
OTU1157	0	0	0	0	18	Bacteria;Firmicutes;Clostridia;Clostridiales;Ruminococcaceae;Ruminococcaceae_UCG-003
OTU0194	8	0	0	0	0	Bacteria;Firmicutes;Clostridia;Clostridiales;Ruminococcaceae;Ruminococcaceae_UCG-005
OTU1260	0	10	0	0	0	Bacteria;Firmicutes;Clostridia;Clostridiales;Ruminococcaceae;Ruminococcus_2
OTU1313	0	0	0	0	7	Bacteria;Firmicutes;NA;NA;NA;NA
OTU0204	0	0	0	0	0	Bacteria;Firmicutes;Negativicutes;Selenomonadales;Acidaminococcaceae;Acidaminococcus
OTU0080	0	0	0	0	1734	Bacteria;Firmicutes;Negativicutes;Selenomonadales;Acidaminococcaceae;Phascolarctobacterium
OTU0116	0	0	0	0	1225	Bacteria;Firmicutes;Negativicutes;Selenomonadales;Acidaminococcaceae;Phascolarctobacterium
OTU0014	9584	0	0	0	0	Bacteria;Firmicutes;Negativicutes;Selenomonadales;Veillonellaceae;Veillonella
OTU0028	6659	0	0	0	0	Bacteria;Firmicutes;Negativicutes;Selenomonadales;Veillonellaceae;Veillonella
OTU0074	0	0	0	2012	0	Bacteria;Firmicutes;Negativicutes;Selenomonadales;Veillonellaceae;Veillonella
OTU0111	1295	0	0	0	0	Bacteria;Firmicutes;Negativicutes;Selenomonadales;Veillonellaceae;Veillonella
OTU0339	243	0	0	0	0	Bacteria;Firmicutes;Negativicutes;Selenomonadales;Veillonellaceae;Veillonella
OTU0420	178	0	0	0	0	Bacteria;Firmicutes;Negativicutes;Selenomonadales;Veillonellaceae;Veillonella
OTU0037	0	0	0	3241	0	Bacteria;Firmicutes;Negativicutes;Selenomonadales;Veillonellaceae;Zymophilus
OTU0462	0	147	0	0	0	Bacteria;Fusobacteria;Fusobacteriia;Fusobacteriales;Fusobacteriaceae;Fusobacterium
OTU0627	0	85	0	0	0	Bacteria;Fusobacteria;Fusobacteriia;Fusobacteriales;Fusobacteriaceae;Fusobacterium
OTU0470	145	0	0	0	0	Bacteria;Fusobacteria;Fusobacteriia;Fusobacteriales;Leptotrichiaceae;Leptotrichia
OTU0623	86	0	0	0	0	Bacteria;Fusobacteria;Fusobacteriia;Fusobacteriales;Leptotrichiaceae;Leptotrichia
OTU0717	0	0	0	0	0	Bacteria;Gemmatimonadetes;Gemmatimonadetes;Gemmatimonadales;Gemmatimonadaceae;NA
OTU0605	0	0	91	0	0	Bacteria;Gracilibacteria;NA;NA;NA;NA
OTU0278	0	0	322	0	0	Bacteria;Planctomycetes;Planctomycetacia;Planctomycetales;Planctomycetaceae;NA
OTU0200	0	0	0	0	0	Bacteria;Planctomycetes;Planctomycetacia;Planctomycetales;Planctomycetaceae;Planctomyces
OTU0907	0	0	40	0	0	Bacteria;Proteobacteria;Alphaproteobacteria;Caulobacterales;Caulobacteraceae;Brevundimonas
OTU1185	0	0	15	0	0	Bacteria;Proteobacteria;Alphaproteobacteria;Caulobacterales;Caulobacteraceae;NA
OTU1168	0	0	0	0	0	Bacteria;Proteobacteria;Alphaproteobacteria;Rhizobiales;Aurantimonadaceae;NA
OTU0698	0	0	0	0	0	Bacteria;Proteobacteria;Alphaproteobacteria;Rhizobiales;Bradyrhizobiaceae;Nitrobacter
OTU0868	0	0	44	0	0	Bacteria;Proteobacteria;Alphaproteobacteria;Rhizobiales;Hyphomicrobiaceae;Devosia
OTU0415	0	0	0	0	0	Bacteria;Proteobacteria;Alphaproteobacteria;Rhizobiales;Methylobacteriaceae;Methylobacterium
OTU0594	0	0	13	0	0	Bacteria;Proteobacteria;Alphaproteobacteria;Rhizobiales;Methylobacteriaceae;Methylobacterium
OTU0852	0	0	0	0	0	Bacteria;Proteobacteria;Alphaproteobacteria;Rhizobiales;Methylobacteriaceae;Methylobacterium
OTU1097	0	0	24	0	0	Bacteria;Proteobacteria;Alphaproteobacteria;Rhizobiales;Methylobacteriaceae;Methylobacterium
OTU0466	0	0	0	5	0	Bacteria;Proteobacteria;Alphaproteobacteria;Rhizobiales;Xanthobacteraceae;NA
OTU0574	0	0	0	0	0	Bacteria;Proteobacteria;Alphaproteobacteria;Rhizobiales;Xanthobacteraceae;Pseudolabrys
OTU0158	0	0	0	0	0	Bacteria;Proteobacteria;Alphaproteobacteria;Rhodobacterales;Rhodobacteraceae;Haematobacter
OTU0425	0	0	0	0	0	Bacteria;Proteobacteria;Alphaproteobacteria;Rhodobacterales;Rhodobacteraceae;NA
OTU0883	0	0	0	0	0	Bacteria;Proteobacteria;Alphaproteobacteria;Rhodobacterales;Rhodobacteraceae;NA
OTU1184	0	0	15	0	0	Bacteria;Proteobacteria;Alphaproteobacteria;Rhodobacterales;Rhodobacteraceae;NA
OTU0293	0	0	0	0	0	Bacteria;Proteobacteria;Alphaproteobacteria;Rhodobacterales;Rhodobacteraceae;Paracoccus
OTU0441	0	0	0	0	0	Bacteria;Proteobacteria;Alphaproteobacteria;Rhodobacterales;Rhodobacteraceae;Paracoccus
OTU0549	0	0	0	0	0	Bacteria;Proteobacteria;Alphaproteobacteria;Rhodobacterales;Rhodobacteraceae;Paracoccus
OTU0188	0	0	0	0	0	Bacteria;Proteobacteria;Alphaproteobacteria;Rhodospirillales;Acetobacteraceae;Acidiphilium
OTU1034	0	5	5	0	0	Bacteria;Proteobacteria;Alphaproteobacteria;Rhodospirillales;Rhodospirillaceae;NA
OTU1252	0	0	0	11	0	Bacteria;Proteobacteria;Alphaproteobacteria;Rhodospirillales;Rhodospirillales_Incertae_Sedis;Reyranella
OTU0398	0	0	0	197	0	Bacteria;Proteobacteria;Alphaproteobacteria;Rickettsiales;Mitochondria;NA
OTU0700	0	0	33	0	0	Bacteria;Proteobacteria;Alphaproteobacteria;Rickettsiales;Mitochondria;NA
OTU0885	0	0	0	43	0	Bacteria;Proteobacteria;Alphaproteobacteria;Rickettsiales;Mitochondria;NA
OTU0976	0	0	0	34	0	Bacteria;Proteobacteria;Alphaproteobacteria;Rickettsiales;Mitochondria;NA
OTU1295	0	0	0	8	0	Bacteria;Proteobacteria;Alphaproteobacteria;Rickettsiales;Mitochondria;NA
OTU1233	0	0	12	0	0	Bacteria;Proteobacteria;Alphaproteobacteria;Sphingomonadales;Ellin6055;NA
OTU0521	0	0	0	0	0	Bacteria;Proteobacteria;Alphaproteobacteria;Sphingomonadales;Sphingomonadaceae;Sphingomonas
OTU1107	0	0	23	0	0	Bacteria;Proteobacteria;Alphaproteobacteria;Sphingomonadales;Sphingomonadaceae;Sphingorhabdus
OTU0386	0	0	203	0	0	Bacteria;Proteobacteria;Betaproteobacteria;Burkholderiales;Burkholderiaceae;Burkholderia-Paraburkholderia
OTU1287	0	0	8	0	0	Bacteria;Proteobacteria;Betaproteobacteria;Burkholderiales;Burkholderiaceae;Burkholderia-Paraburkholderia
OTU0457	149	0	0	0	0	Bacteria;Proteobacteria;Betaproteobacteria;Burkholderiales;Burkholderiaceae;Lautropia
OTU0696	0	0	68	0	0	Bacteria;Proteobacteria;Betaproteobacteria;Burkholderiales;Burkholderiaceae;Ralstonia
OTU0198	0	0	573	0	0	Bacteria;Proteobacteria;Betaproteobacteria;Burkholderiales;Comamonadaceae;Aquabacterium
OTU0649	0	0	80	0	0	Bacteria;Proteobacteria;Betaproteobacteria;Burkholderiales;Comamonadaceae;Comamonas
OTU0653	0	0	0	79	0	Bacteria;Proteobacteria;Betaproteobacteria;Burkholderiales;Comamonadaceae;Hydrogenophaga
OTU0724	0	0	0	63	0	Bacteria;Proteobacteria;Betaproteobacteria;Burkholderiales;Comamonadaceae;Pelomonas
OTU0351	0	0	0	0	0	Bacteria;Proteobacteria;Betaproteobacteria;Burkholderiales;Comamonadaceae;Pseudorhodoferax
OTU0963	0	0	0	0	0	Bacteria;Proteobacteria;Betaproteobacteria;Burkholderiales;Comamonadaceae;Pseudorhodoferax
OTU0319	0	0	0	0	0	Bacteria;Proteobacteria;Betaproteobacteria;Burkholderiales;Oxalobacteraceae;Massilia
OTU1225	0	0	0	0	13	Bacteria;Proteobacteria;Betaproteobacteria;Burkholderiales;Oxalobacteraceae;Oxalobacter
OTU0918	38	0	0	0	0	Bacteria;Proteobacteria;Betaproteobacteria;Burkholderiales;Oxalobacteraceae;Undibacterium
OTU1006	0	0	32	0	0	Bacteria;Proteobacteria;Betaproteobacteria;Neisseriales;Neisseriaceae;Conchiformibius
OTU0283	0	0	0	188	0	Bacteria;Proteobacteria;Betaproteobacteria;Neisseriales;Neisseriaceae;Paludibacterium
OTU1237	0	0	0	0	0	Bacteria;Proteobacteria;Deltaproteobacteria;Myxococcales;Phaselicystidaceae;Phaselicystis
OTU1169	0	0	0	0	0	Bacteria;Proteobacteria;Deltaproteobacteria;Oligoflexales;0319-6G20;NA
OTU1342	0	2	0	0	0	Bacteria;Proteobacteria;Gammaproteobacteria;Aeromonadales;Aeromonadaceae;Aeromonas
OTU0208	0	0	0	0	0	Bacteria;Proteobacteria;Gammaproteobacteria;Alteromonadales;Alteromonadaceae;Alishewanella
OTU1194	14	0	0	0	0	Bacteria;Proteobacteria;Gammaproteobacteria;Alteromonadales;Alteromonadaceae;Alishewanella
OTU0525	0	0	117	0	0	Bacteria;Proteobacteria;Gammaproteobacteria;Alteromonadales;Pseudoalteromonadaceae;Pseudoalteromonas
OTU0650	0	0	80	0	0	Bacteria;Proteobacteria;Gammaproteobacteria;Alteromonadales;Pseudoalteromonadaceae;Pseudoalteromonas
OTU0229	0	0	0	471	0	Bacteria;Proteobacteria;Gammaproteobacteria;Enterobacteriales;Enterobacteriaceae;Esherichica/Shigella
OTU0331	0	0	0	246	0	Bacteria;Proteobacteria;Gammaproteobacteria;Enterobacteriales;Enterobacteriaceae;Esherichica/Shigella
OTU0127	0	0	672	0	0	Bacteria;Proteobacteria;Gammaproteobacteria;Enterobacteriales;Enterobacteriaceae;Klebsiella
OTU0648	0	0	0	0	0	Bacteria;Proteobacteria;Gammaproteobacteria;Enterobacteriales;Enterobacteriaceae;NA
OTU0182	0	0	0	168	0	Bacteria;Proteobacteria;Gammaproteobacteria;Enterobacteriales;Enterobacteriaceae;Yersinia
OTU0367	0	0	0	0	0	Bacteria;Proteobacteria;Gammaproteobacteria;Enterobacteriales;Enterobacteriaceae;Yersinia
OTU1304	0	0	7	0	0	Bacteria;Proteobacteria;Gammaproteobacteria;KI89A_clade;NA;NA
OTU0238	0	0	0	445	0	Bacteria;Proteobacteria;Gammaproteobacteria;Oceanospirillales;Alcanivoracaceae;Alcanivorax
OTU0253	0	0	0	395	0	Bacteria;Proteobacteria;Gammaproteobacteria;Oceanospirillales;Alcanivoracaceae;Alcanivorax
OTU0463	0	0	0	147	0	Bacteria;Proteobacteria;Gammaproteobacteria;Oceanospirillales;Alcanivoracaceae;Alcanivorax
OTU0540	0	0	0	110	0	Bacteria;Proteobacteria;Gammaproteobacteria;Oceanospirillales;Alcanivoracaceae;Alcanivorax
OTU0667	0	0	0	0	0	Bacteria;Proteobacteria;Gammaproteobacteria;Oceanospirillales;Alcanivoracaceae;Alcanivorax
OTU0669	0	0	0	75	0	Bacteria;Proteobacteria;Gammaproteobacteria;Oceanospirillales;Alcanivoracaceae;Alcanivorax
OTU0683	0	0	0	71	0	Bacteria;Proteobacteria;Gammaproteobacteria;Oceanospirillales;Alcanivoracaceae;Alcanivorax
OTU0177	6	0	0	0	0	Bacteria;Proteobacteria;Gammaproteobacteria;Oceanospirillales;Halomonadaceae;Halomonas
OTU0395	0	0	0	0	0	Bacteria;Proteobacteria;Gammaproteobacteria;Pasteurellales;Pasteurellaceae;Haemophilus
OTU0520	119	0	0	0	0	Bacteria;Proteobacteria;Gammaproteobacteria;Pasteurellales;Pasteurellaceae;Haemophilus
OTU0084	0	0	0	1655	0	Bacteria;Proteobacteria;Gammaproteobacteria;Pseudomonadales;Moraxellaceae;Acinetobacter
OTU0159	0	0	0	0	0	Bacteria;Proteobacteria;Gammaproteobacteria;Pseudomonadales;Moraxellaceae;Acinetobacter
OTU0347	0	0	0	0	0	Bacteria;Proteobacteria;Gammaproteobacteria;Pseudomonadales;Moraxellaceae;Acinetobacter
OTU0370	0	0	0	0	0	Bacteria;Proteobacteria;Gammaproteobacteria;Pseudomonadales;Moraxellaceae;Acinetobacter
OTU0511	0	0	0	0	0	Bacteria;Proteobacteria;Gammaproteobacteria;Pseudomonadales;Moraxellaceae;Acinetobacter
OTU1201	0	0	14	0	0	Bacteria;Proteobacteria;Gammaproteobacteria;Pseudomonadales;Moraxellaceae;Acinetobacter
OTU0236	0	0	0	459	0	Bacteria;Proteobacteria;Gammaproteobacteria;Pseudomonadales;Moraxellaceae;Alkanindiges
OTU0078	0	0	0	1049	0	Bacteria;Proteobacteria;Gammaproteobacteria;Pseudomonadales;Moraxellaceae;Enhydrobacter
OTU0220	0	0	0	495	0	Bacteria;Proteobacteria;Gammaproteobacteria;Pseudomonadales;Moraxellaceae;Enhydrobacter
OTU0380	0	0	0	0	0	Bacteria;Proteobacteria;Gammaproteobacteria;Pseudomonadales;Moraxellaceae;Enhydrobacter
OTU0419	0	0	0	179	0	Bacteria;Proteobacteria;Gammaproteobacteria;Pseudomonadales;Moraxellaceae;Enhydrobacter
OTU0551	0	0	0	106	0	Bacteria;Proteobacteria;Gammaproteobacteria;Pseudomonadales;Moraxellaceae;Enhydrobacter
OTU0631	0	0	0	0	0	Bacteria;Proteobacteria;Gammaproteobacteria;Pseudomonadales;Moraxellaceae;Psychrobacter
OTU0799	0	0	51	0	0	Bacteria;Proteobacteria;Gammaproteobacteria;Pseudomonadales;Moraxellaceae;Psychrobacter
OTU0172	0	0	0	708	0	Bacteria;Proteobacteria;Gammaproteobacteria;Pseudomonadales;Pseudomonadaceae;Pseudomonas
OTU0202	542	0	0	0	0	Bacteria;Proteobacteria;Gammaproteobacteria;Pseudomonadales;Pseudomonadaceae;Pseudomonas
OTU0306	0	0	0	280	0	Bacteria;Proteobacteria;Gammaproteobacteria;Pseudomonadales;Pseudomonadaceae;Pseudomonas
OTU0493	132	0	0	0	0	Bacteria;Proteobacteria;Gammaproteobacteria;Pseudomonadales;Pseudomonadaceae;Pseudomonas
OTU0506	0	0	0	125	0	Bacteria;Proteobacteria;Gammaproteobacteria;Pseudomonadales;Pseudomonadaceae;Pseudomonas
OTU0509	0	0	0	0	0	Bacteria;Proteobacteria;Gammaproteobacteria;Pseudomonadales;Pseudomonadaceae;Pseudomonas
OTU0325	0	0	0	0	0	Bacteria;Proteobacteria;Gammaproteobacteria;Salinisphaerales;Salinisphaeraceae;Salinisphaera
OTU0748	0	0	58	0	0	Bacteria;Proteobacteria;Gammaproteobacteria;Xanthomonadales;Xanthomonadaceae;Fulvimonas
OTU0674	0	0	0	74	0	Bacteria;Proteobacteria;Gammaproteobacteria;Xanthomonadales;Xanthomonadaceae;Lysobacter
OTU1328	0	0	0	0	0	Bacteria;Proteobacteria;Gammaproteobacteria;Xanthomonadales;Xanthomonadaceae;NA
OTU0248	0	0	0	0	0	Bacteria;Proteobacteria;Gammaproteobacteria;Xanthomonadales;Xanthomonadaceae;Pseudoxanthomonas
OTU0935	0	0	37	0	0	Bacteria;Proteobacteria;Gammaproteobacteria;Xanthomonadales;Xanthomonadaceae;Pseudoxanthomonas
OTU0763	0	0	56	0	0	Bacteria;Proteobacteria;Gammaproteobacteria;Xanthomonadales;Xanthomonadaceae;Thermomonas
OTU0426	0	0	15	155	0	Bacteria;Proteobacteria;Gammaproteobacteria;Xanthomonadales;Xanthomonadaceae;Xanthomonas
OTU0874	0	0	0	0	0	Bacteria;Proteobacteria;Gammaproteobacteria;Xanthomonadales;Xanthomonadales_Incertae_Sedis;Acidibacter
OTU0980	33	0	0	0	0	Bacteria;Proteobacteria;Gammaproteobacteria;Xanthomonadales;Xanthomonadales_Incertae_Sedis;Acidibacter
OTU0580	0	0	0	0	0	Bacteria;Saccharibacteria;NA;NA;NA;NA
OTU1039	0	0	29	0	0	Bacteria;Saccharibacteria;NA;NA;NA;NA
OTU1152	0	0	0	18	0	Bacteria;Saccharibacteria;NA;NA;NA;NA
OTU0060	0	2825	0	0	0	Bacteria;Synergistetes;Synergistia;Synergistales;Synergistaceae;Pyramidobacter
OTU0586	0	96	0	0	0	Bacteria;Synergistetes;Synergistia;Synergistales;Synergistaceae;Pyramidobacter
OTU0036	0	0	0	0	4726	Bacteria;Verrucomicrobia;Opitutae;NA;NA;NA
OTU0167	0	0	0	0	738	Bacteria;Verrucomicrobia;Opitutae;NA;NA;NA
OTU1347	0	0	0	0	2	Bacteria;Verrucomicrobia;Opitutae;NA;NA;NA
OTU0020	0	0	0	0	8183	Bacteria;Verrucomicrobia;Verrucomicrobiae;Verrucomicrobiales;Verrucomicrobiaceae;Akkermansia
OTU0417	0	0	0	0	181	Bacteria;Verrucomicrobia;Verrucomicrobiae;Verrucomicrobiales;Verrucomicrobiaceae;Akkermansia
OTU0205	0	0	0	0	0	Bacteria;Verrucomicrobia;Verrucomicrobiae;Verrucomicrobiales;Verrucomicrobiaceae;NA
OTU0987	0	0	33	0	0	Eukaryota;NA;NA;NA;NA;NA
OTU1320	0	5	0	0	0	Eukaryota;NA;NA;NA;NA;NA
OTU0213	0	518	0	0	0	NA;NA;NA;NA;NA;NA
OTU0490	0	0	133	0	0	NA;NA;NA;NA;NA;NA
	0	523	166	0	0

## Sheet: biom_PCR11
Supplementary table 1g - biom table obtained after DADA2 analysis from the primer pair 519F-785R
#OTU ID	oral-11	appendix-11	nose-11	skin-11	stool-11	taxonomy
OTU238	0	0	0	0	96	Archaea;Euryarchaeota;Methanobacteria;Methanobacteriales;Methanobacteriaceae;Methanobrevibacter
OTU248	0	0	0	0	88	Archaea;Euryarchaeota;Methanobacteria;Methanobacteriales;Methanobacteriaceae;Methanosphaera
OTU441	0	0	0	0	0	Archaea;Euryarchaeota;Methanomicrobia;Methanosarcinales;Methanosarcinaceae;Methanosarcina
OTU258	0	0	83	0	0	Archaea;Thaumarchaeota;Soil_Crenarchaeotic_Group(SCG);NA;NA;NA
OTU418	0	0	0	0	0	Archaea;Thaumarchaeota;Soil_Crenarchaeotic_Group(SCG);NA;NA;NA
OTU435	0	0	0	8	0	Bacteria;Acidobacteria;Blastocatellia;Blastocatellales;Blastocatellaceae_(Subgroup_4);Blastocatella
OTU146	0	0	235	0	0	Bacteria;Acidobacteria;Subgroup_17;NA;NA;NA
OTU242	0	0	92	0	0	Bacteria;Acidobacteria;Subgroup_2;NA;NA;NA
OTU271	0	0	75	0	0	Bacteria;Acidobacteria;Subgroup_6;NA;NA;NA
OTU388	0	0	17	0	0	Bacteria;Acidobacteria;Subgroup_6;NA;NA;NA
OTU136	266	0	0	0	0	Bacteria;Actinobacteria;Actinobacteria;Actinomycetales;Actinomycetaceae;Actinomyces
OTU285	62	0	0	0	0	Bacteria;Actinobacteria;Actinobacteria;Actinomycetales;Actinomycetaceae;Actinomyces
OTU331	40	0	0	0	0	Bacteria;Actinobacteria;Actinobacteria;Actinomycetales;Actinomycetaceae;Actinomyces
OTU366	0	0	0	23	0	Bacteria;Actinobacteria;Actinobacteria;Actinomycetales;Actinomycetaceae;Actinomyces
OTU005	0	0	0	0	6100	Bacteria;Actinobacteria;Actinobacteria;Bifidobacteriales;Bifidobacteriaceae;Bifidobacterium
OTU032	0	0	0	0	1460	Bacteria;Actinobacteria;Actinobacteria;Bifidobacteriales;Bifidobacteriaceae;Bifidobacterium
OTU053	0	0	0	0	965	Bacteria;Actinobacteria;Actinobacteria;Bifidobacteriales;Bifidobacteriaceae;Bifidobacterium
OTU183	0	0	0	0	167	Bacteria;Actinobacteria;Actinobacteria;Bifidobacteriales;Bifidobacteriaceae;Bifidobacterium
OTU337	0	0	0	0	38	Bacteria;Actinobacteria;Actinobacteria;Bifidobacteriales;Bifidobacteriaceae;Bifidobacterium
OTU002	0	0	8812	0	0	Bacteria;Actinobacteria;Actinobacteria;Corynebacteriales;Corynebacteriaceae;Corynebacterium_1
OTU003	0	0	0	0	0	Bacteria;Actinobacteria;Actinobacteria;Corynebacteriales;Corynebacteriaceae;Corynebacterium_1
OTU004	0	0	5734	0	0	Bacteria;Actinobacteria;Actinobacteria;Corynebacteriales;Corynebacteriaceae;Corynebacterium_1
OTU157	0	0	212	0	0	Bacteria;Actinobacteria;Actinobacteria;Corynebacteriales;Corynebacteriaceae;Corynebacterium_1
OTU198	0	0	146	0	0	Bacteria;Actinobacteria;Actinobacteria;Corynebacteriales;Corynebacteriaceae;Corynebacterium_1
OTU292	0	0	0	0	0	Bacteria;Actinobacteria;Actinobacteria;Corynebacteriales;Corynebacteriaceae;Corynebacterium_1
OTU411	0	0	13	0	0	Bacteria;Actinobacteria;Actinobacteria;Corynebacteriales;Corynebacteriaceae;Corynebacterium_1
OTU001	0	0	8418	48	0	Bacteria;Actinobacteria;Actinobacteria;Corynebacteriales;Corynebacteriaceae;Lawsonella
OTU144	0	0	237	0	0	Bacteria;Actinobacteria;Actinobacteria;Corynebacteriales;Corynebacteriaceae;Lawsonella
OTU389	0	0	17	0	0	Bacteria;Actinobacteria;Actinobacteria;Corynebacteriales;Mycobacteriaceae;Mycobacterium
OTU296	0	0	0	0	0	Bacteria;Actinobacteria;Actinobacteria;Frankiales;Geodermatophilaceae;Geodermatophilus
OTU332	0	0	0	0	0	Bacteria;Actinobacteria;Actinobacteria;Frankiales;Nakamurellaceae;Nakamurella
OTU010	0	0	0	0	0	Bacteria;Actinobacteria;Actinobacteria;Micrococcales;Brevibacteriaceae;Brevibacterium
OTU228	0	0	0	0	0	Bacteria;Actinobacteria;Actinobacteria;Micrococcales;Brevibacteriaceae;Brevibacterium
OTU364	0	0	0	0	0	Bacteria;Actinobacteria;Actinobacteria;Micrococcales;Brevibacteriaceae;Brevibacterium
OTU297	0	0	0	0	0	Bacteria;Actinobacteria;Actinobacteria;Micrococcales;Dermabacteraceae;Brachybacterium
OTU307	0	0	0	0	0	Bacteria;Actinobacteria;Actinobacteria;Micrococcales;Dermabacteraceae;Brachybacterium
OTU360	0	0	25	0	0	Bacteria;Actinobacteria;Actinobacteria;Micrococcales;Dermabacteraceae;Dermabacter
OTU025	0	0	0	0	0	Bacteria;Actinobacteria;Actinobacteria;Micrococcales;Dermacoccaceae;NA
OTU129	0	0	49	0	0	Bacteria;Actinobacteria;Actinobacteria;Micrococcales;Intrasporangiaceae;Janibacter
OTU041	0	0	0	0	0	Bacteria;Actinobacteria;Actinobacteria;Micrococcales;Microbacteriaceae;Zimmermannella
OTU259	0	0	0	83	0	Bacteria;Actinobacteria;Actinobacteria;Micrococcales;Micrococcaceae;Kocuria
OTU062	0	0	81	495	0	Bacteria;Actinobacteria;Actinobacteria;Micrococcales;Micrococcaceae;Micrococcus
OTU204	0	0	0	132	0	Bacteria;Actinobacteria;Actinobacteria;Micrococcales;Micrococcaceae;Micrococcus
OTU197	0	0	0	0	0	Bacteria;Actinobacteria;Actinobacteria;Micrococcales;Micrococcaceae;NA
OTU203	0	0	0	132	0	Bacteria;Actinobacteria;Actinobacteria;Micrococcales;Micrococcaceae;Rothia
OTU308	0	0	0	0	0	Bacteria;Actinobacteria;Actinobacteria;Micrococcales;Micrococcaceae;Rothia
OTU340	0	0	36	0	0	Bacteria;Actinobacteria;Actinobacteria;Micrococcales;Micrococcaceae;Rothia
OTU310	0	0	47	0	0	Bacteria;Actinobacteria;Actinobacteria;Propionibacteriales;Nocardioidaceae;Marmoricola
OTU265	0	0	79	0	0	Bacteria;Actinobacteria;Actinobacteria;Propionibacteriales;Nocardioidaceae;Nocardioides
OTU275	0	0	63	0	0	Bacteria;Actinobacteria;Actinobacteria;Propionibacteriales;Propionibacteriaceae;Propionibacterium
OTU282	0	0	0	0	67	Bacteria;Actinobacteria;Coriobacteriia;Coriobacteriales;Coriobacteriaceae;Adlercreutzia
OTU132	0	0	0	0	276	Bacteria;Actinobacteria;Coriobacteriia;Coriobacteriales;Coriobacteriaceae;Collinsella
OTU455	2	0	0	0	0	Bacteria;Actinobacteria;Coriobacteriia;Coriobacteriales;Coriobacteriaceae;Collinsella
OTU135	0	0	0	0	267	Bacteria;Actinobacteria;Coriobacteriia;Coriobacteriales;Coriobacteriaceae;NA
OTU380	0	0	0	0	19	Bacteria;Actinobacteria;Coriobacteriia;Coriobacteriales;Coriobacteriaceae;NA
OTU446	0	0	0	0	5	Bacteria;Actinobacteria;Coriobacteriia;Coriobacteriales;Coriobacteriaceae;NA
OTU401	0	0	0	0	16	Bacteria;Actinobacteria;Coriobacteriia;Coriobacteriales;Coriobacteriaceae;Senegalimassilia
OTU367	0	0	0	7	0	Bacteria;Actinobacteria;Rubrobacteria;Rubrobacterales;Rubrobacteriaceae;Rubrobacter
OTU030	0	0	0	0	1513	Bacteria;Bacteroidetes;Bacteroidia;Bacteroidales;Bacteroidaceae;Bacteroides
OTU034	0	0	0	0	1426	Bacteria;Bacteroidetes;Bacteroidia;Bacteroidales;Bacteroidaceae;Bacteroides
OTU047	0	0	0	0	0	Bacteria;Bacteroidetes;Bacteroidia;Bacteroidales;Bacteroidaceae;Bacteroides
OTU052	0	0	0	0	966	Bacteria;Bacteroidetes;Bacteroidia;Bacteroidales;Bacteroidaceae;Bacteroides
OTU071	0	0	0	0	599	Bacteria;Bacteroidetes;Bacteroidia;Bacteroidales;Bacteroidaceae;Bacteroides
OTU072	0	0	0	0	592	Bacteria;Bacteroidetes;Bacteroidia;Bacteroidales;Bacteroidaceae;Bacteroides
OTU074	0	0	0	0	589	Bacteria;Bacteroidetes;Bacteroidia;Bacteroidales;Bacteroidaceae;Bacteroides
OTU077	0	0	0	0	578	Bacteria;Bacteroidetes;Bacteroidia;Bacteroidales;Bacteroidaceae;Bacteroides
OTU080	0	0	0	0	551	Bacteria;Bacteroidetes;Bacteroidia;Bacteroidales;Bacteroidaceae;Bacteroides
OTU102	0	0	0	0	372	Bacteria;Bacteroidetes;Bacteroidia;Bacteroidales;Bacteroidaceae;Bacteroides
OTU122	0	0	0	0	292	Bacteria;Bacteroidetes;Bacteroidia;Bacteroidales;Bacteroidaceae;Bacteroides
OTU141	0	0	0	0	253	Bacteria;Bacteroidetes;Bacteroidia;Bacteroidales;Bacteroidaceae;Bacteroides
OTU158	0	0	0	19	0	Bacteria;Bacteroidetes;Bacteroidia;Bacteroidales;Bacteroidaceae;Bacteroides
OTU161	0	0	0	0	210	Bacteria;Bacteroidetes;Bacteroidia;Bacteroidales;Bacteroidaceae;Bacteroides
OTU227	0	0	0	0	0	Bacteria;Bacteroidetes;Bacteroidia;Bacteroidales;Bacteroidaceae;Bacteroides
OTU235	0	0	0	0	101	Bacteria;Bacteroidetes;Bacteroidia;Bacteroidales;Bacteroidaceae;Bacteroides
OTU278	0	0	0	0	69	Bacteria;Bacteroidetes;Bacteroidia;Bacteroidales;Bacteroidaceae;Bacteroides
OTU300	0	0	0	0	0	Bacteria;Bacteroidetes;Bacteroidia;Bacteroidales;Bacteroidaceae;Bacteroides
OTU305	0	48	0	0	0	Bacteria;Bacteroidetes;Bacteroidia;Bacteroidales;Bacteroidaceae;Bacteroides
OTU316	0	0	0	0	45	Bacteria;Bacteroidetes;Bacteroidia;Bacteroidales;Bacteroidaceae;Bacteroides
OTU424	0	0	0	0	11	Bacteria;Bacteroidetes;Bacteroidia;Bacteroidales;Bacteroidaceae;Bacteroides
OTU459	0	0	0	0	2	Bacteria;Bacteroidetes;Bacteroidia;Bacteroidales;Bacteroidaceae;Bacteroides
OTU037	0	0	0	0	1383	Bacteria;Bacteroidetes;Bacteroidia;Bacteroidales;Bacteroidales_S24-7_group;NA
OTU084	0	0	0	0	530	Bacteria;Bacteroidetes;Bacteroidia;Bacteroidales;Bacteroidales_S24-7_group;NA
OTU162	0	0	0	0	209	Bacteria;Bacteroidetes;Bacteroidia;Bacteroidales;Bacteroidales_S24-7_group;NA
OTU225	0	0	0	0	108	Bacteria;Bacteroidetes;Bacteroidia;Bacteroidales;Bacteroidales_S24-7_group;NA
OTU211	0	0	0	0	125	Bacteria;Bacteroidetes;Bacteroidia;Bacteroidales;Porphyromonadaceae;Butyricimonas
OTU212	0	0	0	0	124	Bacteria;Bacteroidetes;Bacteroidia;Bacteroidales;Porphyromonadaceae;Butyricimonas
OTU428	0	0	0	0	10	Bacteria;Bacteroidetes;Bacteroidia;Bacteroidales;Porphyromonadaceae;NA
OTU240	0	0	0	0	95	Bacteria;Bacteroidetes;Bacteroidia;Bacteroidales;Porphyromonadaceae;Odoribacter
OTU063	0	0	0	0	758	Bacteria;Bacteroidetes;Bacteroidia;Bacteroidales;Porphyromonadaceae;Parabacteroides
OTU167	0	0	0	0	200	Bacteria;Bacteroidetes;Bacteroidia;Bacteroidales;Porphyromonadaceae;Parabacteroides
OTU250	0	0	0	0	88	Bacteria;Bacteroidetes;Bacteroidia;Bacteroidales;Porphyromonadaceae;Parabacteroides
OTU315	0	0	0	0	45	Bacteria;Bacteroidetes;Bacteroidia;Bacteroidales;Porphyromonadaceae;Parabacteroides
OTU312	45	0	0	0	0	Bacteria;Bacteroidetes;Bacteroidia;Bacteroidales;Porphyromonadaceae;Porphyromonas
OTU402	0	15	0	0	0	Bacteria;Bacteroidetes;Bacteroidia;Bacteroidales;Porphyromonadaceae;Tannerella
OTU266	0	77	0	0	0	Bacteria;Bacteroidetes;Bacteroidia;Bacteroidales;Prevotellaceae;Alloprevotella
OTU075	0	0	0	0	588	Bacteria;Bacteroidetes;Bacteroidia;Bacteroidales;Prevotellaceae;NA
OTU209	0	0	0	0	126	Bacteria;Bacteroidetes;Bacteroidia;Bacteroidales;Prevotellaceae;NA
OTU120	0	0	0	297	0	Bacteria;Bacteroidetes;Bacteroidia;Bacteroidales;Prevotellaceae;Prevotella_7
OTU069	0	0	0	0	646	Bacteria;Bacteroidetes;Bacteroidia;Bacteroidales;Rikenellaceae;Alistipes
OTU110	0	0	0	0	338	Bacteria;Bacteroidetes;Bacteroidia;Bacteroidales;Rikenellaceae;Alistipes
OTU124	0	0	0	0	290	Bacteria;Bacteroidetes;Bacteroidia;Bacteroidales;Rikenellaceae;Alistipes
OTU153	0	0	0	0	216	Bacteria;Bacteroidetes;Bacteroidia;Bacteroidales;Rikenellaceae;Alistipes
OTU172	0	0	0	0	187	Bacteria;Bacteroidetes;Bacteroidia;Bacteroidales;Rikenellaceae;Alistipes
OTU184	0	0	0	0	166	Bacteria;Bacteroidetes;Bacteroidia;Bacteroidales;Rikenellaceae;Alistipes
OTU192	0	0	0	0	155	Bacteria;Bacteroidetes;Bacteroidia;Bacteroidales;Rikenellaceae;Alistipes
OTU202	0	0	0	0	134	Bacteria;Bacteroidetes;Bacteroidia;Bacteroidales;Rikenellaceae;Alistipes
OTU280	0	0	0	0	68	Bacteria;Bacteroidetes;Bacteroidia;Bacteroidales;Rikenellaceae;Alistipes
OTU430	0	0	0	0	0	Bacteria;Bacteroidetes;Bacteroidia;Bacteroidales;Rikenellaceae;Alistipes
OTU438	6	0	0	0	0	Bacteria;Bacteroidetes;Bacteroidia;Bacteroidales;Rikenellaceae;Alistipes
OTU374	0	0	0	0	0	Bacteria;Bacteroidetes;Cytophagia;Cytophagales;Cytophagaceae;Adhaeribacter
OTU221	108	0	0	0	0	Bacteria;Bacteroidetes;Flavobacteriia;Flavobacteriales;Flavobacteriaceae;Capnocytophaga
OTU277	70	0	0	0	0	Bacteria;Bacteroidetes;Flavobacteriia;Flavobacteriales;Flavobacteriaceae;Capnocytophaga
OTU281	0	0	0	67	0	Bacteria;Bacteroidetes;Flavobacteriia;Flavobacteriales;Flavobacteriaceae;Capnocytophaga
OTU417	12	0	0	0	0	Bacteria;Bacteroidetes;Flavobacteriia;Flavobacteriales;Flavobacteriaceae;Capnocytophaga
OTU050	0	0	0	1014	0	Bacteria;Bacteroidetes;Flavobacteriia;Flavobacteriales;Flavobacteriaceae;Chryseobacterium
OTU436	0	0	0	8	0	Bacteria;Bacteroidetes;Flavobacteriia;Flavobacteriales;Flavobacteriaceae;Chryseobacterium
OTU254	0	0	0	0	85	Bacteria;Bacteroidetes;Flavobacteriia;Flavobacteriales;NA;NA
OTU336	0	0	38	0	0	Bacteria;Bacteroidetes;Sphingobacteriia;Sphingobacteriales;Sphingobacteriaceae;Sphingobacterium
OTU130	0	0	0	100	0	Bacteria;Cyanobacteria;Chloroplast;NA;NA;NA
OTU191	0	0	0	0	0	Bacteria;Cyanobacteria;Chloroplast;NA;NA;NA
OTU324	0	0	0	42	0	Bacteria;Cyanobacteria;Chloroplast;NA;NA;NA
OTU139	0	0	0	260	0	Bacteria;Cyanobacteria;Cyanobacteria;SubsectionII;FamilyII;Chroococcidiopsis
OTU143	0	0	0	0	245	Bacteria;Cyanobacteria;Melainabacteria;Gastranaerophilales;NA;NA
OTU422	0	0	0	0	12	Bacteria;Cyanobacteria;Melainabacteria;Gastranaerophilales;NA;NA
OTU193	0	0	0	0	0	Bacteria;Deinococcus-Thermus;Deinococci;Deinococcales;Deinococcaceae;Deinococcus
OTU083	23	0	0	509	0	Bacteria;Firmicutes;Bacilli;Bacillales;Family_XI;Gemella
OTU214	0	0	0	120	0	Bacteria;Firmicutes;Bacilli;Bacillales;Planococcaceae;Lysinibacillus
OTU006	0	0	5199	29	0	Bacteria;Firmicutes;Bacilli;Bacillales;Staphylococcaceae;Staphylococcus
OTU045	0	0	914	0	0	Bacteria;Firmicutes;Bacilli;Bacillales;Staphylococcaceae;Staphylococcus
OTU115	0	0	316	0	0	Bacteria;Firmicutes;Bacilli;Bacillales;Staphylococcaceae;Staphylococcus
OTU123	0	0	291	0	0	Bacteria;Firmicutes;Bacilli;Bacillales;Staphylococcaceae;Staphylococcus
OTU181	0	0	169	0	0	Bacteria;Firmicutes;Bacilli;Bacillales;Staphylococcaceae;Staphylococcus
OTU188	0	0	161	0	0	Bacteria;Firmicutes;Bacilli;Bacillales;Staphylococcaceae;Staphylococcus
OTU014	0	0	0	2840	0	Bacteria;Firmicutes;Bacilli;Lactobacillales;Carnobacteriaceae;Alkalibacterium
OTU114	0	0	0	253	0	Bacteria;Firmicutes;Bacilli;Lactobacillales;Carnobacteriaceae;Alkalibacterium
OTU208	0	0	0	127	0	Bacteria;Firmicutes;Bacilli;Lactobacillales;Carnobacteriaceae;Alkalibacterium
OTU222	0	0	108	0	0	Bacteria;Firmicutes;Bacilli;Lactobacillales;Carnobacteriaceae;Dolosigranulum
OTU234	0	0	0	101	0	Bacteria;Firmicutes;Bacilli;Lactobacillales;Carnobacteriaceae;Granulicatella
OTU256	84	0	0	0	0	Bacteria;Firmicutes;Bacilli;Lactobacillales;Carnobacteriaceae;Granulicatella
OTU089	0	0	0	0	492	Bacteria;Firmicutes;Bacilli;Lactobacillales;Enterococcaceae;Enterococcus
OTU298	51	0	0	0	0	Bacteria;Firmicutes;Bacilli;Lactobacillales;Enterococcaceae;Enterococcus
OTU035	0	0	113	0	0	Bacteria;Firmicutes;Bacilli;Lactobacillales;Lactobacillaceae;Lactobacillus
OTU186	0	0	0	164	0	Bacteria;Firmicutes;Bacilli;Lactobacillales;Lactobacillaceae;Lactobacillus
OTU253	0	0	0	0	0	Bacteria;Firmicutes;Bacilli;Lactobacillales;Lactobacillaceae;Lactobacillus
OTU267	0	0	0	0	0	Bacteria;Firmicutes;Bacilli;Lactobacillales;Lactobacillaceae;Lactobacillus
OTU363	0	0	24	0	0	Bacteria;Firmicutes;Bacilli;Lactobacillales;Lactobacillaceae;Lactobacillus
OTU134	0	0	268	0	0	Bacteria;Firmicutes;Bacilli;Lactobacillales;Streptococcaceae;Lactococcus
OTU205	0	0	131	0	0	Bacteria;Firmicutes;Bacilli;Lactobacillales;Streptococcaceae;Lactococcus
OTU031	1327	0	133	30	0	Bacteria;Firmicutes;Bacilli;Lactobacillales;Streptococcaceae;Streptococcus
OTU043	0	0	0	0	0	Bacteria;Firmicutes;Bacilli;Lactobacillales;Streptococcaceae;Streptococcus
OTU133	268	0	0	0	0	Bacteria;Firmicutes;Bacilli;Lactobacillales;Streptococcaceae;Streptococcus
OTU200	0	0	0	0	138	Bacteria;Firmicutes;Bacilli;Lactobacillales;Streptococcaceae;Streptococcus
OTU263	0	0	0	0	0	Bacteria;Firmicutes;Bacilli;Lactobacillales;Streptococcaceae;Streptococcus
OTU290	57	0	0	0	0	Bacteria;Firmicutes;Bacilli;Lactobacillales;Streptococcaceae;Streptococcus
OTU150	0	0	0	0	222	Bacteria;Firmicutes;Clostridia;Clostridiales;Christensenellaceae;Christensenellaceae_R-7_group
OTU334	0	0	0	0	39	Bacteria;Firmicutes;Clostridia;Clostridiales;Christensenellaceae;Christensenellaceae_R-7_group
OTU400	0	0	0	0	16	Bacteria;Firmicutes;Clostridia;Clostridiales;Christensenellaceae;Christensenellaceae_R-7_group
OTU406	0	0	0	0	15	Bacteria;Firmicutes;Clostridia;Clostridiales;Christensenellaceae;Christensenellaceae_R-7_group
OTU373	0	0	0	4	0	Bacteria;Firmicutes;Clostridia;Clostridiales;Christensenellaceae;Christensenellaceae_R-7_group
OTU138	0	0	0	0	261	Bacteria;Firmicutes;Clostridia;Clostridiales;Christensenellaceae;NA
OTU421	0	0	0	0	12	Bacteria;Firmicutes;Clostridia;Clostridiales;Christensenellaceae;NA
OTU362	0	0	24	0	0	Bacteria;Firmicutes;Clostridia;Clostridiales;Clostridiaceae_1;Clostridium_sensu_stricto_1
OTU444	5	0	0	0	0	Bacteria;Firmicutes;Clostridia;Clostridiales;Clostridiaceae_2;Alkaliphilus
OTU107	0	0	0	0	346	Bacteria;Firmicutes;Clostridia;Clostridiales;Clostridiales_vadinBB60_group;NA
OTU379	0	0	0	0	19	Bacteria;Firmicutes;Clostridia;Clostridiales;Clostridiales_vadinBB60_group;NA
OTU048	0	0	0	0	0	Bacteria;Firmicutes;Clostridia;Clostridiales;Family_XI;Anaerococcus
OTU051	0	0	0	0	0	Bacteria;Firmicutes;Clostridia;Clostridiales;Family_XI;Anaerococcus
OTU261	0	0	82	0	0	Bacteria;Firmicutes;Clostridia;Clostridiales;Family_XI;Anaerococcus
OTU287	0	0	0	0	0	Bacteria;Firmicutes;Clostridia;Clostridiales;Family_XI;Anaerococcus
OTU306	0	0	19	0	0	Bacteria;Firmicutes;Clostridia;Clostridiales;Family_XI;Finegoldia
OTU058	0	0	869	0	0	Bacteria;Firmicutes;Clostridia;Clostridiales;Family_XI;Peptoniphilus
OTU325	0	0	0	0	42	Bacteria;Firmicutes;Clostridia;Clostridiales;Family_XIII;Family_XIII_AD3011_group
OTU343	0	0	0	0	36	Bacteria;Firmicutes;Clostridia;Clostridiales;Family_XIII;Family_XIII_AD3011_group
OTU393	0	0	0	0	17	Bacteria;Firmicutes;Clostridia;Clostridiales;Family_XIII;Family_XIII_AD3011_group
OTU416	0	0	0	0	13	Bacteria;Firmicutes;Clostridia;Clostridiales;Family_XIII;Family_XIII_AD3011_group
OTU283	0	0	0	0	65	Bacteria;Firmicutes;Clostridia;Clostridiales;Family_XIII;Family_XIII_UCG-001
OTU044	0	0	0	0	1108	Bacteria;Firmicutes;Clostridia;Clostridiales;Lachnospiraceae;Anaerostipes
OTU085	0	0	0	0	525	Bacteria;Firmicutes;Clostridia;Clostridiales;Lachnospiraceae;Anaerostipes
OTU056	0	0	0	0	940	Bacteria;Firmicutes;Clostridia;Clostridiales;Lachnospiraceae;Blautia
OTU117	0	0	0	0	313	Bacteria;Firmicutes;Clostridia;Clostridiales;Lachnospiraceae;Blautia
OTU118	0	0	0	0	304	Bacteria;Firmicutes;Clostridia;Clostridiales;Lachnospiraceae;Blautia
OTU180	0	0	0	0	170	Bacteria;Firmicutes;Clostridia;Clostridiales;Lachnospiraceae;Blautia
OTU217	0	0	0	0	114	Bacteria;Firmicutes;Clostridia;Clostridiales;Lachnospiraceae;Blautia
OTU231	0	0	0	0	102	Bacteria;Firmicutes;Clostridia;Clostridiales;Lachnospiraceae;Blautia
OTU255	0	0	0	0	85	Bacteria;Firmicutes;Clostridia;Clostridiales;Lachnospiraceae;Blautia
OTU274	0	0	0	74	0	Bacteria;Firmicutes;Clostridia;Clostridiales;Lachnospiraceae;Catonella
OTU177	0	0	0	0	176	Bacteria;Firmicutes;Clostridia;Clostridiales;Lachnospiraceae;Coprococcus_1
OTU284	0	0	0	0	63	Bacteria;Firmicutes;Clostridia;Clostridiales;Lachnospiraceae;Coprococcus_1
OTU426	0	0	0	10	0	Bacteria;Firmicutes;Clostridia;Clostridiales;Lachnospiraceae;Coprococcus_2
OTU128	0	0	0	0	287	Bacteria;Firmicutes;Clostridia;Clostridiales;Lachnospiraceae;Coprococcus_3
OTU170	0	0	0	0	196	Bacteria;Firmicutes;Clostridia;Clostridiales;Lachnospiraceae;Dorea
OTU301	0	0	0	0	50	Bacteria;Firmicutes;Clostridia;Clostridiales;Lachnospiraceae;Dorea
OTU097	0	0	0	0	427	Bacteria;Firmicutes;Clostridia;Clostridiales;Lachnospiraceae;Fusicatenibacter
OTU207	0	0	0	0	130	Bacteria;Firmicutes;Clostridia;Clostridiales;Lachnospiraceae;Fusicatenibacter
OTU425	10	0	0	0	0	Bacteria;Firmicutes;Clostridia;Clostridiales;Lachnospiraceae;Johnsonella
OTU061	0	0	0	0	790	Bacteria;Firmicutes;Clostridia;Clostridiales;Lachnospiraceae;Lachnospira
OTU131	0	0	0	0	276	Bacteria;Firmicutes;Clostridia;Clostridiales;Lachnospiraceae;Lachnospira
OTU210	0	0	0	0	126	Bacteria;Firmicutes;Clostridia;Clostridiales;Lachnospiraceae;Lachnospira
OTU246	0	0	0	0	90	Bacteria;Firmicutes;Clostridia;Clostridiales;Lachnospiraceae;Lachnospiraceae_FCS020_group
OTU335	0	0	0	0	39	Bacteria;Firmicutes;Clostridia;Clostridiales;Lachnospiraceae;Lachnospiraceae_FCS020_group
OTU432	0	0	0	0	9	Bacteria;Firmicutes;Clostridia;Clostridiales;Lachnospiraceae;Lachnospiraceae_FCS020_group
OTU113	0	0	0	0	330	Bacteria;Firmicutes;Clostridia;Clostridiales;Lachnospiraceae;Lachnospiraceae_ND3007_group
OTU094	0	0	0	0	471	Bacteria;Firmicutes;Clostridia;Clostridiales;Lachnospiraceae;Lachnospiraceae_NK4A136_group
OTU179	0	0	0	0	172	Bacteria;Firmicutes;Clostridia;Clostridiales;Lachnospiraceae;Lachnospiraceae_NK4A136_group
OTU194	0	0	0	0	154	Bacteria;Firmicutes;Clostridia;Clostridiales;Lachnospiraceae;Lachnospiraceae_NK4A136_group
OTU429	0	0	0	0	10	Bacteria;Firmicutes;Clostridia;Clostridiales;Lachnospiraceae;Lachnospiraceae_NK4A136_group
OTU392	0	0	0	0	17	Bacteria;Firmicutes;Clostridia;Clostridiales;Lachnospiraceae;Lachnospiraceae_NK4B4_group
OTU152	0	0	0	0	218	Bacteria;Firmicutes;Clostridia;Clostridiales;Lachnospiraceae;Lachnospiraceae_UCG-001
OTU408	0	0	0	0	14	Bacteria;Firmicutes;Clostridia;Clostridiales;Lachnospiraceae;Lachnospiraceae_UCG-004
OTU142	0	0	0	0	248	Bacteria;Firmicutes;Clostridia;Clostridiales;Lachnospiraceae;Marvinbryantia
OTU156	0	0	0	0	214	Bacteria;Firmicutes;Clostridia;Clostridiales;Lachnospiraceae;Marvinbryantia
OTU247	0	0	0	0	90	Bacteria;Firmicutes;Clostridia;Clostridiales;Lachnospiraceae;Marvinbryantia
OTU013	0	0	0	0	2938	Bacteria;Firmicutes;Clostridia;Clostridiales;Lachnospiraceae;NA
OTU081	0	0	0	0	543	Bacteria;Firmicutes;Clostridia;Clostridiales;Lachnospiraceae;NA
OTU137	0	0	0	0	266	Bacteria;Firmicutes;Clostridia;Clostridiales;Lachnospiraceae;NA
OTU159	0	0	0	0	212	Bacteria;Firmicutes;Clostridia;Clostridiales;Lachnospiraceae;NA
OTU163	0	0	0	0	206	Bacteria;Firmicutes;Clostridia;Clostridiales;Lachnospiraceae;NA
OTU164	0	0	0	0	206	Bacteria;Firmicutes;Clostridia;Clostridiales;Lachnospiraceae;NA
OTU226	0	0	0	0	108	Bacteria;Firmicutes;Clostridia;Clostridiales;Lachnospiraceae;NA
OTU260	0	0	0	0	83	Bacteria;Firmicutes;Clostridia;Clostridiales;Lachnospiraceae;NA
OTU318	0	44	0	0	0	Bacteria;Firmicutes;Clostridia;Clostridiales;Lachnospiraceae;NA
OTU328	0	0	0	0	41	Bacteria;Firmicutes;Clostridia;Clostridiales;Lachnospiraceae;NA
OTU338	0	0	0	0	38	Bacteria;Firmicutes;Clostridia;Clostridiales;Lachnospiraceae;NA
OTU378	0	0	0	0	19	Bacteria;Firmicutes;Clostridia;Clostridiales;Lachnospiraceae;NA
OTU407	0	0	0	0	15	Bacteria;Firmicutes;Clostridia;Clostridiales;Lachnospiraceae;NA
OTU420	0	0	0	0	12	Bacteria;Firmicutes;Clostridia;Clostridiales;Lachnospiraceae;NA
OTU028	0	0	0	0	1582	Bacteria;Firmicutes;Clostridia;Clostridiales;Lachnospiraceae;Roseburia
OTU099	0	0	0	0	419	Bacteria;Firmicutes;Clostridia;Clostridiales;Lachnospiraceae;Roseburia
OTU140	0	0	0	0	257	Bacteria;Firmicutes;Clostridia;Clostridiales;Lachnospiraceae;Roseburia
OTU171	0	0	0	0	190	Bacteria;Firmicutes;Clostridia;Clostridiales;Lachnospiraceae;Roseburia
OTU241	0	0	0	0	94	Bacteria;Firmicutes;Clostridia;Clostridiales;Lachnospiraceae;Roseburia
OTU303	0	0	0	0	49	Bacteria;Firmicutes;Clostridia;Clostridiales;Lachnospiraceae;Roseburia
OTU409	0	0	0	0	14	Bacteria;Firmicutes;Clostridia;Clostridiales;Lachnospiraceae;Syntrophococcus
OTU127	0	0	0	0	287	Bacteria;Firmicutes;Clostridia;Clostridiales;NA;NA
OTU326	0	0	0	0	42	Bacteria;Firmicutes;Clostridia;Clostridiales;NA;NA
OTU385	0	0	0	0	18	Bacteria;Firmicutes;Clostridia;Clostridiales;NA;NA
OTU451	0	0	0	0	4	Bacteria;Firmicutes;Clostridia;Clostridiales;NA;NA
OTU397	0	0	0	0	16	Bacteria;Firmicutes;Clostridia;Clostridiales;Peptococcaceae;Dehalobacterium
OTU357	0	0	0	0	26	Bacteria;Firmicutes;Clostridia;Clostridiales;Peptococcaceae;NA
OTU443	0	0	0	0	6	Bacteria;Firmicutes;Clostridia;Clostridiales;Peptostreptococcaceae;Intestinibacter
OTU243	0	0	0	0	92	Bacteria;Firmicutes;Clostridia;Clostridiales;Ruminococcaceae;Acetanaerobacterium
OTU268	0	0	0	0	76	Bacteria;Firmicutes;Clostridia;Clostridiales;Ruminococcaceae;Anaerotruncus
OTU359	0	0	0	0	26	Bacteria;Firmicutes;Clostridia;Clostridiales;Ruminococcaceae;Anaerotruncus
OTU410	0	0	0	0	14	Bacteria;Firmicutes;Clostridia;Clostridiales;Ruminococcaceae;Anaerotruncus
OTU415	0	0	0	0	13	Bacteria;Firmicutes;Clostridia;Clostridiales;Ruminococcaceae;Anaerotruncus
OTU176	0	0	0	0	176	Bacteria;Firmicutes;Clostridia;Clostridiales;Ruminococcaceae;Butyricicoccus
OTU064	0	0	0	0	755	Bacteria;Firmicutes;Clostridia;Clostridiales;Ruminococcaceae;Caproiciproducens
OTU404	0	0	0	0	15	Bacteria;Firmicutes;Clostridia;Clostridiales;Ruminococcaceae;Caproiciproducens
OTU011	0	0	0	0	3124	Bacteria;Firmicutes;Clostridia;Clostridiales;Ruminococcaceae;Faecalibacterium
OTU046	0	0	0	0	1074	Bacteria;Firmicutes;Clostridia;Clostridiales;Ruminococcaceae;Faecalibacterium
OTU073	0	0	0	0	590	Bacteria;Firmicutes;Clostridia;Clostridiales;Ruminococcaceae;Faecalibacterium
OTU101	0	0	0	0	387	Bacteria;Firmicutes;Clostridia;Clostridiales;Ruminococcaceae;Faecalibacterium
OTU168	0	0	0	0	199	Bacteria;Firmicutes;Clostridia;Clostridiales;Ruminococcaceae;Faecalibacterium
OTU309	0	0	0	0	48	Bacteria;Firmicutes;Clostridia;Clostridiales;Ruminococcaceae;Intestinimonas
OTU375	0	0	0	0	20	Bacteria;Firmicutes;Clostridia;Clostridiales;Ruminococcaceae;Intestinimonas
OTU145	0	0	0	0	237	Bacteria;Firmicutes;Clostridia;Clostridiales;Ruminococcaceae;NA
OTU151	0	0	0	0	221	Bacteria;Firmicutes;Clostridia;Clostridiales;Ruminococcaceae;NA
OTU314	0	0	0	0	45	Bacteria;Firmicutes;Clostridia;Clostridiales;Ruminococcaceae;NA
OTU376	0	0	0	0	20	Bacteria;Firmicutes;Clostridia;Clostridiales;Ruminococcaceae;NA
OTU398	0	0	0	0	16	Bacteria;Firmicutes;Clostridia;Clostridiales;Ruminococcaceae;NA
OTU399	0	0	0	0	16	Bacteria;Firmicutes;Clostridia;Clostridiales;Ruminococcaceae;NA
OTU414	0	0	0	0	13	Bacteria;Firmicutes;Clostridia;Clostridiales;Ruminococcaceae;NA
OTU448	4	0	0	0	0	Bacteria;Firmicutes;Clostridia;Clostridiales;Ruminococcaceae;NA
OTU369	0	0	0	0	22	Bacteria;Firmicutes;Clostridia;Clostridiales;Ruminococcaceae;Oscillibacter
OTU427	0	0	0	0	10	Bacteria;Firmicutes;Clostridia;Clostridiales;Ruminococcaceae;Oscillibacter
OTU289	0	0	0	0	61	Bacteria;Firmicutes;Clostridia;Clostridiales;Ruminococcaceae;Ruminiclostridium_5
OTU304	0	0	0	0	49	Bacteria;Firmicutes;Clostridia;Clostridiales;Ruminococcaceae;Ruminiclostridium_5
OTU027	0	0	0	0	1583	Bacteria;Firmicutes;Clostridia;Clostridiales;Ruminococcaceae;Ruminiclostridium_6
OTU245	0	0	0	0	90	Bacteria;Firmicutes;Clostridia;Clostridiales;Ruminococcaceae;Ruminiclostridium_9
OTU345	0	0	0	0	33	Bacteria;Firmicutes;Clostridia;Clostridiales;Ruminococcaceae;Ruminiclostridium_9
OTU196	0	0	0	0	151	Bacteria;Firmicutes;Clostridia;Clostridiales;Ruminococcaceae;Ruminococcaceae_NK4A214_group
OTU199	0	0	0	0	139	Bacteria;Firmicutes;Clostridia;Clostridiales;Ruminococcaceae;Ruminococcaceae_NK4A214_group
OTU249	0	0	0	0	88	Bacteria;Firmicutes;Clostridia;Clostridiales;Ruminococcaceae;Ruminococcaceae_NK4A214_group
OTU288	0	0	0	0	62	Bacteria;Firmicutes;Clostridia;Clostridiales;Ruminococcaceae;Ruminococcaceae_NK4A214_group
OTU317	0	0	0	0	45	Bacteria;Firmicutes;Clostridia;Clostridiales;Ruminococcaceae;Ruminococcaceae_NK4A214_group
OTU384	0	0	0	0	18	Bacteria;Firmicutes;Clostridia;Clostridiales;Ruminococcaceae;Ruminococcaceae_NK4A214_group
OTU067	0	0	0	0	714	Bacteria;Firmicutes;Clostridia;Clostridiales;Ruminococcaceae;Ruminococcaceae_UCG-002
OTU125	0	0	0	0	289	Bacteria;Firmicutes;Clostridia;Clostridiales;Ruminococcaceae;Ruminococcaceae_UCG-002
OTU155	0	0	0	0	215	Bacteria;Firmicutes;Clostridia;Clostridiales;Ruminococcaceae;Ruminococcaceae_UCG-002
OTU206	0	0	0	0	131	Bacteria;Firmicutes;Clostridia;Clostridiales;Ruminococcaceae;Ruminococcaceae_UCG-002
OTU311	0	0	0	0	46	Bacteria;Firmicutes;Clostridia;Clostridiales;Ruminococcaceae;Ruminococcaceae_UCG-002
OTU403	0	0	0	0	0	Bacteria;Firmicutes;Clostridia;Clostridiales;Ruminococcaceae;Ruminococcaceae_UCG-002
OTU342	0	0	0	0	36	Bacteria;Firmicutes;Clostridia;Clostridiales;Ruminococcaceae;Ruminococcaceae_UCG-003
OTU079	0	0	0	0	569	Bacteria;Firmicutes;Clostridia;Clostridiales;Ruminococcaceae;Ruminococcaceae_UCG-005
OTU319	0	0	0	0	44	Bacteria;Firmicutes;Clostridia;Clostridiales;Ruminococcaceae;Ruminococcaceae_UCG-005
OTU321	0	0	0	0	43	Bacteria;Firmicutes;Clostridia;Clostridiales;Ruminococcaceae;Ruminococcaceae_UCG-005
OTU346	0	0	0	0	33	Bacteria;Firmicutes;Clostridia;Clostridiales;Ruminococcaceae;Ruminococcaceae_UCG-005
OTU355	0	0	0	0	27	Bacteria;Firmicutes;Clostridia;Clostridiales;Ruminococcaceae;Ruminococcaceae_UCG-005
OTU264	0	0	0	0	81	Bacteria;Firmicutes;Clostridia;Clostridiales;Ruminococcaceae;Ruminococcaceae_UCG-010
OTU329	0	0	0	0	41	Bacteria;Firmicutes;Clostridia;Clostridiales;Ruminococcaceae;Ruminococcaceae_UCG-010
OTU386	0	0	0	0	18	Bacteria;Firmicutes;Clostridia;Clostridiales;Ruminococcaceae;Ruminococcaceae_UCG-010
OTU405	0	0	0	0	15	Bacteria;Firmicutes;Clostridia;Clostridiales;Ruminococcaceae;Ruminococcaceae_UCG-010
OTU413	0	0	0	0	13	Bacteria;Firmicutes;Clostridia;Clostridiales;Ruminococcaceae;Ruminococcaceae_UCG-010
OTU447	0	0	0	0	5	Bacteria;Firmicutes;Clostridia;Clostridiales;Ruminococcaceae;Ruminococcaceae_UCG-010
OTU166	0	0	0	0	201	Bacteria;Firmicutes;Clostridia;Clostridiales;Ruminococcaceae;Ruminococcaceae_UCG-013
OTU361	0	0	0	0	25	Bacteria;Firmicutes;Clostridia;Clostridiales;Ruminococcaceae;Ruminococcaceae_UCG-013
OTU116	0	0	0	0	314	Bacteria;Firmicutes;Clostridia;Clostridiales;Ruminococcaceae;Ruminococcaceae_UCG-014
OTU195	0	0	0	0	153	Bacteria;Firmicutes;Clostridia;Clostridiales;Ruminococcaceae;Ruminococcaceae_UCG-014
OTU215	0	0	0	0	120	Bacteria;Firmicutes;Clostridia;Clostridiales;Ruminococcaceae;Ruminococcaceae_UCG-014
OTU219	0	0	0	0	113	Bacteria;Firmicutes;Clostridia;Clostridiales;Ruminococcaceae;Ruminococcaceae_UCG-014
OTU220	0	0	0	0	112	Bacteria;Firmicutes;Clostridia;Clostridiales;Ruminococcaceae;Ruminococcaceae_UCG-014
OTU229	0	0	0	0	103	Bacteria;Firmicutes;Clostridia;Clostridiales;Ruminococcaceae;Ruminococcaceae_UCG-014
OTU370	0	12	0	0	0	Bacteria;Firmicutes;Clostridia;Clostridiales;Ruminococcaceae;Ruminococcaceae_UCG-014
OTU049	0	0	0	0	1015	Bacteria;Firmicutes;Clostridia;Clostridiales;Ruminococcaceae;Ruminococcus_1
OTU111	0	0	0	0	337	Bacteria;Firmicutes;Clostridia;Clostridiales;Ruminococcaceae;Ruminococcus_1
OTU239	0	0	0	0	95	Bacteria;Firmicutes;Clostridia;Clostridiales;Ruminococcaceae;Ruminococcus_1
OTU382	0	8	0	0	0	Bacteria;Firmicutes;Clostridia;Clostridiales;Ruminococcaceae;Ruminococcus_2
OTU020	0	0	0	0	2093	Bacteria;Firmicutes;Clostridia;Clostridiales;Ruminococcaceae;Subdoligranulum
OTU088	0	0	0	0	492	Bacteria;Firmicutes;Clostridia;Clostridiales;Ruminococcaceae;Subdoligranulum
OTU105	0	0	0	0	362	Bacteria;Firmicutes;Clostridia;Clostridiales;Ruminococcaceae;Subdoligranulum
OTU121	0	0	0	0	296	Bacteria;Firmicutes;Clostridia;Clostridiales;Ruminococcaceae;Subdoligranulum
OTU224	0	0	0	0	108	Bacteria;Firmicutes;Clostridia;NA;NA;NA
OTU087	0	0	0	0	494	Bacteria;Firmicutes;Erysipelotrichia;Erysipelotrichales;Erysipelotrichaceae;Erysipelotrichaceae_UCG-003
OTU431	0	0	0	0	9	Bacteria;Firmicutes;Erysipelotrichia;Erysipelotrichales;Erysipelotrichaceae;Faecalitalea
OTU391	0	0	0	0	17	Bacteria;Firmicutes;Erysipelotrichia;Erysipelotrichales;Erysipelotrichaceae;NA
OTU358	0	0	0	0	26	Bacteria;Firmicutes;Erysipelotrichia;Erysipelotrichales;Erysipelotrichaceae;Turicibacter
OTU437	0	0	0	0	7	Bacteria;Firmicutes;NA;NA;NA;NA
OTU039	0	0	0	0	1311	Bacteria;Firmicutes;Negativicutes;Selenomonadales;Acidaminococcaceae;Phascolarctobacterium
OTU054	0	0	0	0	961	Bacteria;Firmicutes;Negativicutes;Selenomonadales;Acidaminococcaceae;Phascolarctobacterium
OTU341	0	0	0	36	0	Bacteria;Firmicutes;Negativicutes;Selenomonadales;Veillonellaceae;Selenomonas
OTU230	0	0	0	102	0	Bacteria;Firmicutes;Negativicutes;Selenomonadales;Veillonellaceae;Selenomonas_3
OTU320	43	0	0	0	0	Bacteria;Firmicutes;Negativicutes;Selenomonadales;Veillonellaceae;Selenomonas_3
OTU021	2061	0	0	0	0	Bacteria;Firmicutes;Negativicutes;Selenomonadales;Veillonellaceae;Veillonella
OTU055	945	0	0	0	0	Bacteria;Firmicutes;Negativicutes;Selenomonadales;Veillonellaceae;Veillonella
OTU092	237	0	231	13	0	Bacteria;Firmicutes;Negativicutes;Selenomonadales;Veillonellaceae;Veillonella
OTU112	335	0	0	0	0	Bacteria;Firmicutes;Negativicutes;Selenomonadales;Veillonellaceae;Veillonella
OTU276	0	0	0	0	0	Bacteria;Firmicutes;Negativicutes;Selenomonadales;Veillonellaceae;Veillonella
OTU442	0	0	0	0	0	Bacteria;Firmicutes;Negativicutes;Selenomonadales;Veillonellaceae;Zymophilus
OTU082	0	535	0	0	0	Bacteria;Fusobacteria;Fusobacteriia;Fusobacteriales;Fusobacteriaceae;Fusobacterium
OTU232	101	0	0	0	0	Bacteria;Fusobacteria;Fusobacteriia;Fusobacteriales;Fusobacteriaceae;Fusobacterium
OTU458	0	0	0	2	0	Bacteria;Fusobacteria;Fusobacteriia;Fusobacteriales;Fusobacteriaceae;Fusobacterium
OTU383	0	0	18	0	0	Bacteria;Gemmatimonadetes;Longimicrobia;Longimicrobiales;Longimicrobiaceae;NA
OTU182	0	0	0	0	168	Bacteria;Lentisphaerae;Lentisphaeria;Victivallales;Victivallaceae;Victivallis
OTU456	2	0	0	0	0	Bacteria;Lentisphaerae;Lentisphaeria;Victivallales;Victivallaceae;Victivallis
OTU187	0	0	0	0	0	Bacteria;Planctomycetes;Planctomycetacia;Planctomycetales;Planctomycetaceae;Pirellula
OTU078	0	0	0	0	0	Bacteria;Proteobacteria;Alphaproteobacteria;Caulobacterales;Caulobacteraceae;Brevundimonas
OTU160	0	0	0	211	0	Bacteria;Proteobacteria;Alphaproteobacteria;Caulobacterales;Caulobacteraceae;Brevundimonas
OTU412	0	0	13	0	0	Bacteria;Proteobacteria;Alphaproteobacteria;Caulobacterales;Caulobacteraceae;Brevundimonas
OTU252	0	0	86	0	0	Bacteria;Proteobacteria;Alphaproteobacteria;Caulobacterales;Caulobacteraceae;Caulobacter
OTU174	0	0	0	0	0	Bacteria;Proteobacteria;Alphaproteobacteria;Rhizobiales;Aurantimonadaceae;Aureimonas
OTU185	0	0	0	0	0	Bacteria;Proteobacteria;Alphaproteobacteria;Rhizobiales;Aurantimonadaceae;Aureimonas
OTU279	0	0	68	0	0	Bacteria;Proteobacteria;Alphaproteobacteria;Rhizobiales;Bradyrhizobiaceae;Bradyrhizobium
OTU387	17	0	0	0	0	Bacteria;Proteobacteria;Alphaproteobacteria;Rhizobiales;Bradyrhizobiaceae;Bradyrhizobium
OTU396	0	0	0	0	0	Bacteria;Proteobacteria;Alphaproteobacteria;Rhizobiales;Methylobacteriaceae;Methylobacterium
OTU381	18	0	0	0	0	Bacteria;Proteobacteria;Alphaproteobacteria;Rhodobacterales;Rhodobacteraceae;Defluviimonas
OTU368	0	0	0	0	0	Bacteria;Proteobacteria;Alphaproteobacteria;Rhodobacterales;Rhodobacteraceae;Haematobacter
OTU323	0	0	0	0	0	Bacteria;Proteobacteria;Alphaproteobacteria;Rhodobacterales;Rhodobacteraceae;NA
OTU017	0	0	0	0	0	Bacteria;Proteobacteria;Alphaproteobacteria;Rhodobacterales;Rhodobacteraceae;Paracoccus
OTU091	0	0	0	0	0	Bacteria;Proteobacteria;Alphaproteobacteria;Rhodobacterales;Rhodobacteraceae;Paracoccus
OTU148	0	0	223	0	0	Bacteria;Proteobacteria;Alphaproteobacteria;Rhodobacterales;Rhodobacteraceae;Paracoccus
OTU178	0	0	0	0	0	Bacteria;Proteobacteria;Alphaproteobacteria;Rhodobacterales;Rhodobacteraceae;Paracoccus
OTU218	0	0	0	0	0	Bacteria;Proteobacteria;Alphaproteobacteria;Rhodobacterales;Rhodobacteraceae;Paracoccus
OTU273	0	0	0	0	0	Bacteria;Proteobacteria;Alphaproteobacteria;Rhodospirillales;Acetobacteraceae;Acidiphilium
OTU068	0	0	0	0	0	Bacteria;Proteobacteria;Alphaproteobacteria;Rhodospirillales;Acetobacteraceae;Roseomonas
OTU066	0	0	0	0	746	Bacteria;Proteobacteria;Alphaproteobacteria;Rhodospirillales;Rhodospirillaceae;NA
OTU272	0	0	0	0	75	Bacteria;Proteobacteria;Alphaproteobacteria;Rhodospirillales;Rhodospirillaceae;NA
OTU419	0	0	0	0	12	Bacteria;Proteobacteria;Alphaproteobacteria;Rhodospirillales;Rhodospirillaceae;NA
OTU293	0	0	0	0	0	Bacteria;Proteobacteria;Alphaproteobacteria;Rhodospirillales;Rhodospirillales_Incertae_Sedis;Geminicoccus
OTU060	0	0	0	890	0	Bacteria;Proteobacteria;Alphaproteobacteria;Rickettsiales;Mitochondria;NA
OTU106	0	0	0	0	0	Bacteria;Proteobacteria;Alphaproteobacteria;Rickettsiales;SM2D12;NA
OTU294	0	0	55	0	0	Bacteria;Proteobacteria;Alphaproteobacteria;Rickettsiales;SM2D12;NA
OTU449	0	0	4	0	0	Bacteria;Proteobacteria;Alphaproteobacteria;Sphingomonadales;Erythrobacteraceae;Altererythrobacter
OTU365	0	0	0	14	0	Bacteria;Proteobacteria;Alphaproteobacteria;Sphingomonadales;Erythrobacteraceae;NA
OTU313	0	0	45	0	0	Bacteria;Proteobacteria;Alphaproteobacteria;Sphingomonadales;Sphingomonadaceae;Sphingomonas
OTU423	0	0	11	0	0	Bacteria;Proteobacteria;Betaproteobacteria;Burkholderiales;Alcaligenaceae;NA
OTU295	0	0	0	0	55	Bacteria;Proteobacteria;Betaproteobacteria;Burkholderiales;Alcaligenaceae;Parasutterella
OTU036	0	0	0	0	1385	Bacteria;Proteobacteria;Betaproteobacteria;Burkholderiales;Alcaligenaceae;Sutterella
OTU096	440	0	0	0	0	Bacteria;Proteobacteria;Betaproteobacteria;Burkholderiales;Burkholderiaceae;Lautropia
OTU016	0	0	2634	0	0	Bacteria;Proteobacteria;Betaproteobacteria;Burkholderiales;Burkholderiaceae;Ralstonia
OTU057	0	0	922	0	0	Bacteria;Proteobacteria;Betaproteobacteria;Burkholderiales;Burkholderiaceae;Ralstonia
OTU090	0	0	484	0	0	Bacteria;Proteobacteria;Betaproteobacteria;Burkholderiales;Burkholderiaceae;Ralstonia
OTU190	0	0	160	0	0	Bacteria;Proteobacteria;Betaproteobacteria;Burkholderiales;Burkholderiaceae;Ralstonia
OTU262	0	0	81	0	0	Bacteria;Proteobacteria;Betaproteobacteria;Burkholderiales;Burkholderiaceae;Ralstonia
OTU126	0	0	288	0	0	Bacteria;Proteobacteria;Betaproteobacteria;Burkholderiales;Comamonadaceae;Aquabacterium
OTU270	0	15	60	0	0	Bacteria;Proteobacteria;Betaproteobacteria;Burkholderiales;Comamonadaceae;NA
OTU352	0	0	0	0	0	Bacteria;Proteobacteria;Betaproteobacteria;Burkholderiales;Comamonadaceae;NA
OTU216	0	0	116	0	0	Bacteria;Proteobacteria;Betaproteobacteria;Burkholderiales;Comamonadaceae;Schlegelella
OTU394	0	0	16	0	0	Bacteria;Proteobacteria;Betaproteobacteria;Burkholderiales;Oxalobacteraceae;Duganella
OTU390	0	0	0	0	0	Bacteria;Proteobacteria;Betaproteobacteria;Burkholderiales;Oxalobacteraceae;Janthinobacterium
OTU189	0	0	0	0	0	Bacteria;Proteobacteria;Betaproteobacteria;Burkholderiales;Oxalobacteraceae;Massilia
OTU333	0	0	0	0	39	Bacteria;Proteobacteria;Betaproteobacteria;Burkholderiales;Oxalobacteraceae;Oxalobacter
OTU213	123	0	0	0	0	Bacteria;Proteobacteria;Betaproteobacteria;Burkholderiales;Oxalobacteraceae;Undibacterium
OTU454	0	0	0	0	3	Bacteria;Proteobacteria;Betaproteobacteria;Hot_Creek_32;NA;NA
OTU244	0	0	0	0	0	Bacteria;Proteobacteria;Betaproteobacteria;Hydrogenophilales;Hydrogenophilaceae;Hydrogenophilus
OTU434	0	0	0	0	0	Bacteria;Proteobacteria;Betaproteobacteria;Methylophilales;Methylophilaceae;NA
OTU377	0	0	0	0	0	Bacteria;Proteobacteria;Betaproteobacteria;Neisseriales;Neisseriaceae;Kingella
OTU065	0	0	0	753	0	Bacteria;Proteobacteria;Betaproteobacteria;Neisseriales;Neisseriaceae;Neisseria
OTU165	202	0	0	0	0	Bacteria;Proteobacteria;Betaproteobacteria;Neisseriales;Neisseriaceae;Neisseria
OTU349	0	0	0	30	0	Bacteria;Proteobacteria;Betaproteobacteria;Neisseriales;Neisseriaceae;Neisseria
OTU395	0	0	16	0	0	Bacteria;Proteobacteria;Betaproteobacteria;Neisseriales;Neisseriaceae;Neisseria
OTU347	0	0	0	0	0	Bacteria;Proteobacteria;Betaproteobacteria;Neisseriales;Neisseriaceae;Paludibacterium
OTU086	0	0	522	0	0	Bacteria;Proteobacteria;Betaproteobacteria;Neisseriales;Neisseriaceae;Vogesella
OTU372	0	0	20	0	0	Bacteria;Proteobacteria;Betaproteobacteria;SC-I-84;NA;NA
OTU371	0	0	0	0	21	Bacteria;Proteobacteria;Deltaproteobacteria;Desulfovibrionales;Desulfovibrionaceae;Bilophila
OTU350	0	0	0	0	30	Bacteria;Proteobacteria;Deltaproteobacteria;Desulfovibrionales;Desulfovibrionaceae;Desulfovibrio
OTU024	0	0	0	1836	0	Bacteria;Proteobacteria;Gammaproteobacteria;Enterobacteriales;Enterobacteriaceae;Esherichica/Shigella
OTU095	0	0	0	466	0	Bacteria;Proteobacteria;Gammaproteobacteria;Enterobacteriales;Enterobacteriaceae;Esherichica/Shigella
OTU104	0	0	0	366	0	Bacteria;Proteobacteria;Gammaproteobacteria;Enterobacteriales;Enterobacteriaceae;Esherichica/Shigella
OTU070	0	0	611	0	0	Bacteria;Proteobacteria;Gammaproteobacteria;Enterobacteriales;Enterobacteriaceae;Klebsiella
OTU026	0	0	0	1275	370	Bacteria;Proteobacteria;Gammaproteobacteria;Enterobacteriales;Enterobacteriaceae;NA
OTU322	0	0	0	0	0	Bacteria;Proteobacteria;Gammaproteobacteria;Enterobacteriales;Enterobacteriaceae;Yersinia
OTU354	0	0	27	0	0	Bacteria;Proteobacteria;Gammaproteobacteria;NA;NA;NA
OTU233	0	101	0	0	0	Bacteria;Proteobacteria;Gammaproteobacteria;Oceanospirillales;Alcanivoracaceae;Alcanivorax
OTU076	0	0	0	10	0	Bacteria;Proteobacteria;Gammaproteobacteria;Oceanospirillales;Alcanivoracaceae;Alcanivorax
OTU344	0	0	34	0	0	Bacteria;Proteobacteria;Gammaproteobacteria;Oceanospirillales;Halomonadaceae;Halomonas
OTU023	564	0	0	10	66	Bacteria;Proteobacteria;Gammaproteobacteria;Pasteurellales;Pasteurellaceae;Haemophilus
OTU108	110	0	0	0	0	Bacteria;Proteobacteria;Gammaproteobacteria;Pasteurellales;Pasteurellaceae;Haemophilus
OTU251	0	0	0	0	0	Bacteria;Proteobacteria;Gammaproteobacteria;Pasteurellales;Pasteurellaceae;Haemophilus
OTU299	51	0	0	0	0	Bacteria;Proteobacteria;Gammaproteobacteria;Pasteurellales;Pasteurellaceae;Haemophilus
OTU330	0	0	0	0	41	Bacteria;Proteobacteria;Gammaproteobacteria;Pasteurellales;Pasteurellaceae;NA
OTU223	0	0	53	55	0	Bacteria;Proteobacteria;Gammaproteobacteria;Pseudomonadales;Moraxellaceae;Acinetobacter
OTU353	0	0	0	28	0	Bacteria;Proteobacteria;Gammaproteobacteria;Pseudomonadales;Moraxellaceae;Acinetobacter
OTU445	0	0	0	0	0	Bacteria;Proteobacteria;Gammaproteobacteria;Pseudomonadales;Moraxellaceae;Acinetobacter
OTU018	0	0	67	1877	0	Bacteria;Proteobacteria;Gammaproteobacteria;Pseudomonadales;Moraxellaceae;Enhydrobacter
OTU103	0	0	0	343	0	Bacteria;Proteobacteria;Gammaproteobacteria;Pseudomonadales;Moraxellaceae;Enhydrobacter
OTU015	0	194	0	175	0	Bacteria;Proteobacteria;Gammaproteobacteria;Pseudomonadales;Pseudomonadaceae;Pseudomonas
OTU059	0	0	0	0	0	Bacteria;Proteobacteria;Gammaproteobacteria;Pseudomonadales;Pseudomonadaceae;Pseudomonas
OTU098	0	0	0	0	0	Bacteria;Proteobacteria;Gammaproteobacteria;Pseudomonadales;Pseudomonadaceae;Pseudomonas
OTU286	0	0	0	0	0	Bacteria;Proteobacteria;Gammaproteobacteria;Pseudomonadales;Pseudomonadaceae;Pseudomonas
OTU327	0	0	41	0	0	Bacteria;Proteobacteria;Gammaproteobacteria;Pseudomonadales;Pseudomonadaceae;Pseudomonas
OTU351	0	0	29	0	0	Bacteria;Proteobacteria;Gammaproteobacteria;Pseudomonadales;Pseudomonadaceae;Pseudomonas
OTU012	0	0	0	0	0	Bacteria;Proteobacteria;Gammaproteobacteria;Xanthomonadales;Xanthomonadaceae;Pseudoxanthomonas
OTU033	0	0	0	0	0	Bacteria;Proteobacteria;Gammaproteobacteria;Xanthomonadales;Xanthomonadaceae;Pseudoxanthomonas
OTU100	0	0	0	0	0	Bacteria;Proteobacteria;Gammaproteobacteria;Xanthomonadales;Xanthomonadaceae;Pseudoxanthomonas
OTU302	0	0	0	0	0	Bacteria;Proteobacteria;Gammaproteobacteria;Xanthomonadales;Xanthomonadaceae;Pseudoxanthomonas
OTU019	47	0	0	0	0	Bacteria;Proteobacteria;Gammaproteobacteria;Xanthomonadales;Xanthomonadaceae;Stenotrophomonas
OTU457	0	0	2	0	0	Bacteria;Proteobacteria;Gammaproteobacteria;Xanthomonadales;Xanthomonadaceae;Xanthomonas
OTU339	0	0	37	0	0	Bacteria;Saccharibacteria;NA;NA;NA;NA
OTU269	0	75	0	0	0	Bacteria;Synergistetes;Synergistia;Synergistales;Synergistaceae;Pyramidobacter
OTU042	0	0	0	0	1156	Bacteria;Tenericutes;Mollicutes;Mollicutes_RF9;NA;NA
OTU149	0	0	0	0	222	Bacteria;Tenericutes;Mollicutes;Mollicutes_RF9;NA;NA
OTU356	0	0	0	0	26	Bacteria;Tenericutes;Mollicutes;Mollicutes_RF9;NA;NA
OTU119	0	0	0	0	301	Bacteria;Tenericutes;Mollicutes;NB1-n;NA;NA
OTU038	0	0	0	0	1366	Bacteria;Verrucomicrobia;Opitutae;NA;NA;NA
OTU169	0	0	0	0	197	Bacteria;Verrucomicrobia;Opitutae;NA;NA;NA
OTU022	0	0	0	0	1944	Bacteria;Verrucomicrobia;Verrucomicrobiae;Verrucomicrobiales;Verrucomicrobiaceae;Akkermansia
OTU109	0	0	344	0	0	Bacteria;Verrucomicrobia;Verrucomicrobiae;Verrucomicrobiales;Verrucomicrobiaceae;Luteolibacter
OTU009	0	0	3623	0	0	Eukaryota;NA;NA;NA;NA;NA
OTU154	0	0	0	215	0	Eukaryota;NA;NA;NA;NA;NA
OTU452	0	0	3	0	0	Eukaryota;NA;NA;NA;NA;NA
OTU007	0	5266	0	0	0	NA;NA;NA;NA;NA;NA
